# Supplementary material for: Genome-Wide Identification of Expansin Gene Family and Their Response under Hormone Exposure in Ginkgo biloba L
Source: MDPI journal article supplement (doi:10.3390/ijms24065901), 2023-03-21
Supplement: s1 [file s1]

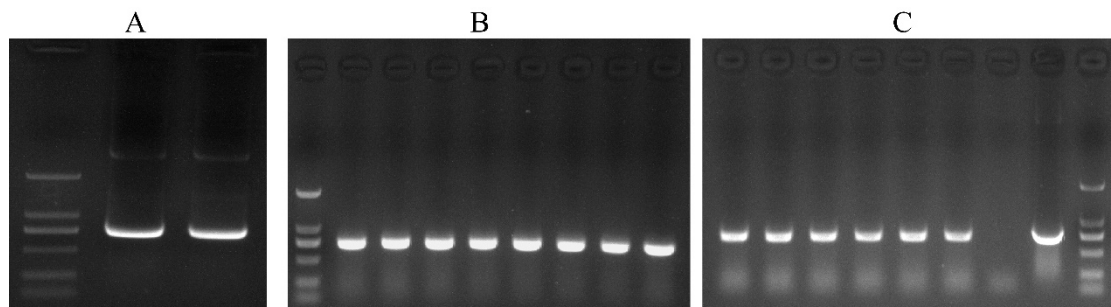

Figure.S1. Identification the positive cloning in vector construction by gel electrophoresis in subcellular localization of *GbEXPA31*. A. CDS full-length amplification of *GbEXPA31* B. Identification the positive cloning of *GbEXPA31* in transformed *Escherichia coli*. C. Identification the positive cloning of *GbEXPA31* in transformed *Agrobacterium tumefaciens*.

|                                     |                                           |     |
|-------------------------------------|-------------------------------------------|-----|
| GbEXPA31+Homologous_splice_sequence | .....TTGGAGAGGACACG                       | 14  |
| GbEXPA31_cloning_1                  | CCCTCTATATAAGGAAGTTCATTTCATTTGGAGAGGACACG | 40  |
| GbEXPA31_cloning_2                  | CCCTCTATATAAGGAAGTTCATTTCATTTGGAGAGGACACG | 40  |
| GbEXPA31_cloning_3                  | CCCTCTATATAAGGAAGTTCATTTCATTTGGAGAGGACACG | 40  |
| Consensus                           | ttggagaggacacg                            |     |
| GbEXPA31+Homologous_splice_sequence | CTCGAGATGGCCAGTTTCTCCAGACATGGGGCTGGACGA   | 54  |
| GbEXPA31_cloning_1                  | CTCGAGATGGCCAGTTTCTCCAGACATGGGGCTGGACGA   | 80  |
| GbEXPA31_cloning_2                  | CTCGAGATGGCCAGTTTCTCCAGACATGGGGCTGGACGA   | 80  |
| GbEXPA31_cloning_3                  | CTCGAGATGGCCAGTTTCTCCAGACATGGGGCTGGACGA   | 80  |
| Consensus                           | ctcgagatggccagtttctccagacatggggctggacga   |     |
| GbEXPA31+Homologous_splice_sequence | ATGCTCATGCAACTTTCTATGGAGGACGAGATGCCACTGG  | 94  |
| GbEXPA31_cloning_1                  | ATGCTCATGCAACTTTCTATGGAGGACGAGATGCCACTGG  | 120 |
| GbEXPA31_cloning_2                  | ATGCTCATGCAACTTTCTATGGAGGACGAGATGCCACTGG  | 120 |
| GbEXPA31_cloning_3                  | ATGCTCATGCAACTTTCTATGGAGGACGAGATGCCACTGG  | 120 |
| Consensus                           | atgctcatgcaactttctatggagggacgagatgccactgg |     |
| GbEXPA31+Homologous_splice_sequence | TACAATGGGCGGCGCGTGTGGGTATGGAAATATGTACAGC  | 134 |
| GbEXPA31_cloning_1                  | TACAATGGGCGGCGCGTGTGGGTATGGAAATATGTACAGC  | 160 |
| GbEXPA31_cloning_2                  | TACAATGGGCGGCGCGTGTGGGTATGGAAATATGTACAGC  | 160 |
| GbEXPA31_cloning_3                  | TACAATGGGCGGCGCGTGTGGGTATGGAAATATGTACAGC  | 160 |
| Consensus                           | tacaatgggcgcgcggtgtgggtatggaaatatgtacagc  |     |
| GbEXPA31+Homologous_splice_sequence | CAAGGATATGGCACGAACACGCGAGCTCTGAGCATGTCTC  | 174 |
| GbEXPA31_cloning_1                  | CAAGGATATGGCACGAACACGCGAGCTCTGAGCATGTCTC  | 200 |
| GbEXPA31_cloning_2                  | CAAGGATATGGCACGAACACGCGAGCTCTGAGCATGTCTC  | 200 |
| GbEXPA31_cloning_3                  | CAAGGATATGGCACGAACACGCGAGCTCTGAGCATGTCTC  | 200 |
| Consensus                           | caaggatatggcacgaacacgcgagctctgagcatgtctc  |     |
| GbEXPA31+Homologous_splice_sequence | TGTTCAACAATGGGCTGAGCTGTGGAGCATGCTATGAAAT  | 214 |
| GbEXPA31_cloning_1                  | TGTTCAACAATGGGCTGAGCTGTGGAGCATGCTATGAAAT  | 240 |
| GbEXPA31_cloning_2                  | TGTTCAACAATGGGCTGAGCTGTGGAGCATGCTATGAAAT  | 240 |
| GbEXPA31_cloning_3                  | TGTTCAACAATGGGCTGAGCTGTGGAGCATGCTATGAAAT  | 240 |
| Consensus                           | tgttcaacaatgggctgagctgtggagcatgctatgaaat  |     |
| GbEXPA31+Homologous_splice_sequence | CAAAATGTACGACGACCCACAGTGGTGTCTGTCCACACACA | 254 |
| GbEXPA31_cloning_1                  | CAAAATGTACGACGACCCACAGTGGTGTCTGTCCACACACA | 280 |
| GbEXPA31_cloning_2                  | CAAAATGTACGACGACCCACAGTGGTGTCTGTCCACACACA | 280 |
| GbEXPA31_cloning_3                  | CAAAATGTACGACGACCCACAGTGGTGTCTGTCCACACACA | 280 |
| Consensus                           | caaatgtaacgacgacccacagtgggtgtctgtccaacaca |     |
| GbEXPA31+Homologous_splice_sequence | ATAGTTGTGACTGCAACGAACCTTCTGCCCGCCCAATCTG  | 294 |
| GbEXPA31_cloning_1                  | ATAGTTGTGACTGCAACGAACCTTCTGCCCGCCCAATCTG  | 320 |
| GbEXPA31_cloning_2                  | ATAGTTGTGACTGCAACGAACCTTCTGCCCGCCCAATCTG  | 320 |
| GbEXPA31_cloning_3                  | ATAGTTGTGACTGCAACGAACCTTCTGCCCGCCCAATCTG  | 320 |
| Consensus                           | atagtttgtactgcaacgaacttctgcccgcccaatctg   |     |
| GbEXPA31+Homologous_splice_sequence | CTCTTCCCAACAATGCGGCGGATGGTCAATCTCCTCTCT   | 334 |
| GbEXPA31_cloning_1                  | CTCTTCCCAACAATGCGGCGGATGGTCAATCTCCTCTCT   | 360 |
| GbEXPA31_cloning_2                  | CTCTTCCCAACAATGCGGCGGATGGTCAATCTCCTCTCT   | 360 |
| GbEXPA31_cloning_3                  | CTCTTCCCAACAATGCGGCGGATGGTCAATCTCCTCTCT   | 360 |
| Consensus                           | ctcttcccaacaatgccggcggaatgggtcaatcctcctct |     |
| GbEXPA31+Homologous_splice_sequence | CCTGCACCTTGTATCTCTCAGAGCCTGTTTTTCAGCATATT | 374 |
| GbEXPA31_cloning_1                  | CCTGCACCTTGTATCTCTCAGAGCCTGTTTTTCAGCATATT | 400 |
| GbEXPA31_cloning_2                  | CCTGCACCTTGTATCTCTCAGAGCCTGTTTTTCAGCATATT | 400 |
| GbEXPA31_cloning_3                  | CCTGCACCTTGTATCTCTCAGAGCCTGTTTTTCAGCATATT | 400 |
| Consensus                           | cctgcaccttgtatctctcagagcctgtttttcagcatatt |     |
| GbEXPA31+Homologous_splice_sequence | GCCAGTTTCAGGGCAGGCAATTGTGCTGTAAATGTACCAA  | 414 |
| GbEXPA31_cloning_1                  | GCCAGTTTCAGGGCAGGCAATTGTGCTGTAAATGTACCAA  | 440 |
| GbEXPA31_cloning_2                  | GCCAGTTTCAGGGCAGGCAATTGTGCTGTAAATGTACCAA  | 440 |
| GbEXPA31_cloning_3                  | GCCAGTTTCAGGGCAGGCAATTGTGCTGTAAATGTACCAA  | 440 |
| Consensus                           | gccagtttcagggcaggcatgtgctgttaattgtaccaaa  |     |
| GbEXPA31+Homologous_splice_sequence | GGGTACCTTGCAGAGAGAGGGGGGATTCGGTTGCACAA    | 454 |
| GbEXPA31_cloning_1                  | GGGTACCTTGCAGAGAGAGGGGGGATTCGGTTGCACAA    | 480 |
| GbEXPA31_cloning_2                  | GGGTACCTTGCAGAGAGAGGGGGGATTCGGTTGCACAA    | 480 |
| GbEXPA31_cloning_3                  | GGGTACCTTGCAGAGAGAGGGGGGATTCGGTTGCACAA    | 480 |
| Consensus                           | gggtaccttgcagaagaagggggattcggttgcacaat    |     |
| GbEXPA31+Homologous_splice_sequence | CAATGGGCATTCACTTCAACCTCGTTCTGTAACCAAC     | 494 |
| GbEXPA31_cloning_1                  | CAATGGGCATTCACTTCAACCTCGTTCTGTAACCAAC     | 520 |
| GbEXPA31_cloning_2                  | CAATGGGCATTCACTTCAACCTCGTTCTGTAACCAAC     | 520 |
| GbEXPA31_cloning_3                  | CAATGGGCATTCACTTCAACCTCGTTCTGTAACCAAC     | 520 |
| Consensus                           | caatgggcatttcaacttcaacctcggtctgtgaaccaac  |     |
| GbEXPA31+Homologous_splice_sequence | GTAGGAGGTGCAGGGGATGTCATGGGGTTTCCATCAAGG   | 534 |
| GbEXPA31_cloning_1                  | GTAGGAGGTGCAGGGGATGTCATGGGGTTTCCATCAAGG   | 560 |
| GbEXPA31_cloning_2                  | GTAGGAGGTGCAGGGGATGTCATGGGGTTTCCATCAAGG   | 560 |
| GbEXPA31_cloning_3                  | GTAGGAGGTGCAGGGGATGTCATGGGGTTTCCATCAAGG   | 560 |
| Consensus                           | gtaggaggtgcaggggatgtcaatggggtttccatcaagg  |     |
| GbEXPA31+Homologous_splice_sequence | GCTCAGGAACCGGGTGGCAGCCATGTCTCGCAACTGGGG   | 574 |
| GbEXPA31_cloning_1                  | GCTCAGGAACCGGGTGGCAGCCATGTCTCGCAACTGGGG   | 600 |
| GbEXPA31_cloning_2                  | GCTCAGGAACCGGGTGGCAGCCATGTCTCGCAACTGGGG   | 600 |
| GbEXPA31_cloning_3                  | GCTCAGGAACCGGGTGGCAGCCATGTCTCGCAACTGGGG   | 600 |
| Consensus                           | gctcaggaaccgggtggcagccaatgtctcgcaactgggg  |     |
| GbEXPA31+Homologous_splice_sequence | CCAAAATTGGCAGAGCAACTCCAACTCAACGGAACAAAGT  | 614 |
| GbEXPA31_cloning_1                  | CCAAAATTGGCAGAGCAACTCCAACTCAACGGAACAAAGT  | 640 |
| GbEXPA31_cloning_2                  | CCAAAATTGGCAGAGCAACTCCAACTCAACGGAACAAAGT  | 640 |
| GbEXPA31_cloning_3                  | CCAAAATTGGCAGAGCAACTCCAACTCAACGGAACAAAGT  | 640 |
| Consensus                           | ccaaaattggcagagcaactccaaactcaacgggacaaagt |     |
| GbEXPA31+Homologous_splice_sequence | CTCTCCTTCAAGGTCAACCAAGCGATGGACAGACCGTCA   | 654 |
| GbEXPA31_cloning_1                  | CTCTCCTTCAAGGTCAACCAAGCGATGGACAGACCGTCA   | 680 |
| GbEXPA31_cloning_2                  | CTCTCCTTCAAGGTCAACCAAGCGATGGACAGACCGTCA   | 680 |
| GbEXPA31_cloning_3                  | CTCTCCTTCAAGGTCAACCAAGCGATGGACAGACCGTCA   | 680 |
| Consensus                           | ctctccttcaaggtcaccaccagcgatggacagacgctca  |     |
| GbEXPA31+Homologous_splice_sequence | CTTCATACAATGCTGCTCCAGCAACTGGCAATTGGCCA    | 694 |
| GbEXPA31_cloning_1                  | CTTCATACAATGCTGCTCCAGCAACTGGCAATTGGCCA    | 720 |
| GbEXPA31_cloning_2                  | CTTCATACAATGCTGCTCCAGCAACTGGCAATTGGCCA    | 720 |
| GbEXPA31_cloning_3                  | CTTCATACAATGCTGCTCCAGCAACTGGCAATTGGCCA    | 720 |
| Consensus                           | cttcataaatgctgctccagcaactggcaatttggcca    |     |
| GbEXPA31+Homologous_splice_sequence | GACTTTTAGCGAGCCCACTTGGCAATGAATCATGGTG     | 734 |
| GbEXPA31_cloning_1                  | GACTTTTAGCGAGCCCACTTGGCAATGAATCATGGTG     | 760 |
| GbEXPA31_cloning_2                  | GACTTTTAGCGAGCCCACTTGGCAATGAATCATGGTG     | 760 |
| GbEXPA31_cloning_3                  | GACTTTTAGCGAGCCCACTTGGCAATGAATCATGGTG     | 760 |
| Consensus                           | gacttttagcggagcccaacttggcaatgaattcatgttg  |     |
| GbEXPA31+Homologous_splice_sequence | AGCAAGG.....                              | 742 |
| GbEXPA31_cloning_1                  | AGCAAGGCGAGAGCTGTTCACCGGGTGGTG            | 793 |
| GbEXPA31_cloning_2                  | AGCAAGGCGAGAGCTGTTCACCGGGTGGTG            | 793 |
| GbEXPA31_cloning_3                  | AGCAAGGCGAGAGCTGTTCACCGGGTGGTG            | 793 |
| Consensus                           | agcaagg                                   |     |

Figure.S2. Sequence alignment of *GbEXPA31* fusing pART-CAM-EGFP.



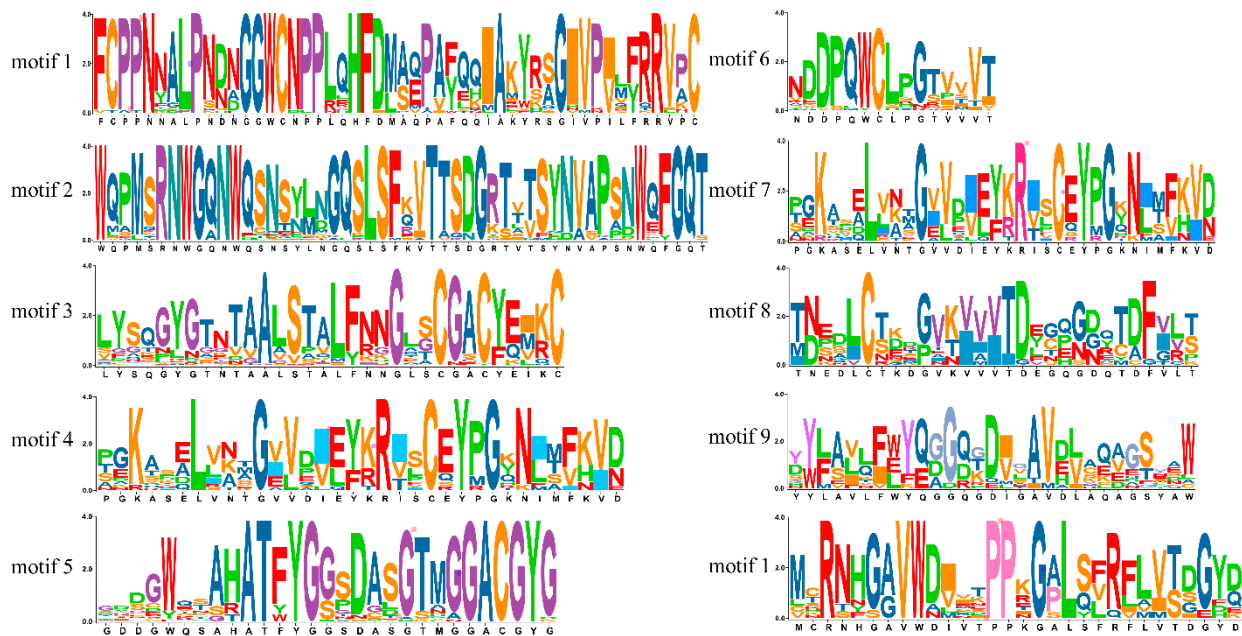

Figure S4. The motif logos in *GbEXP* family.

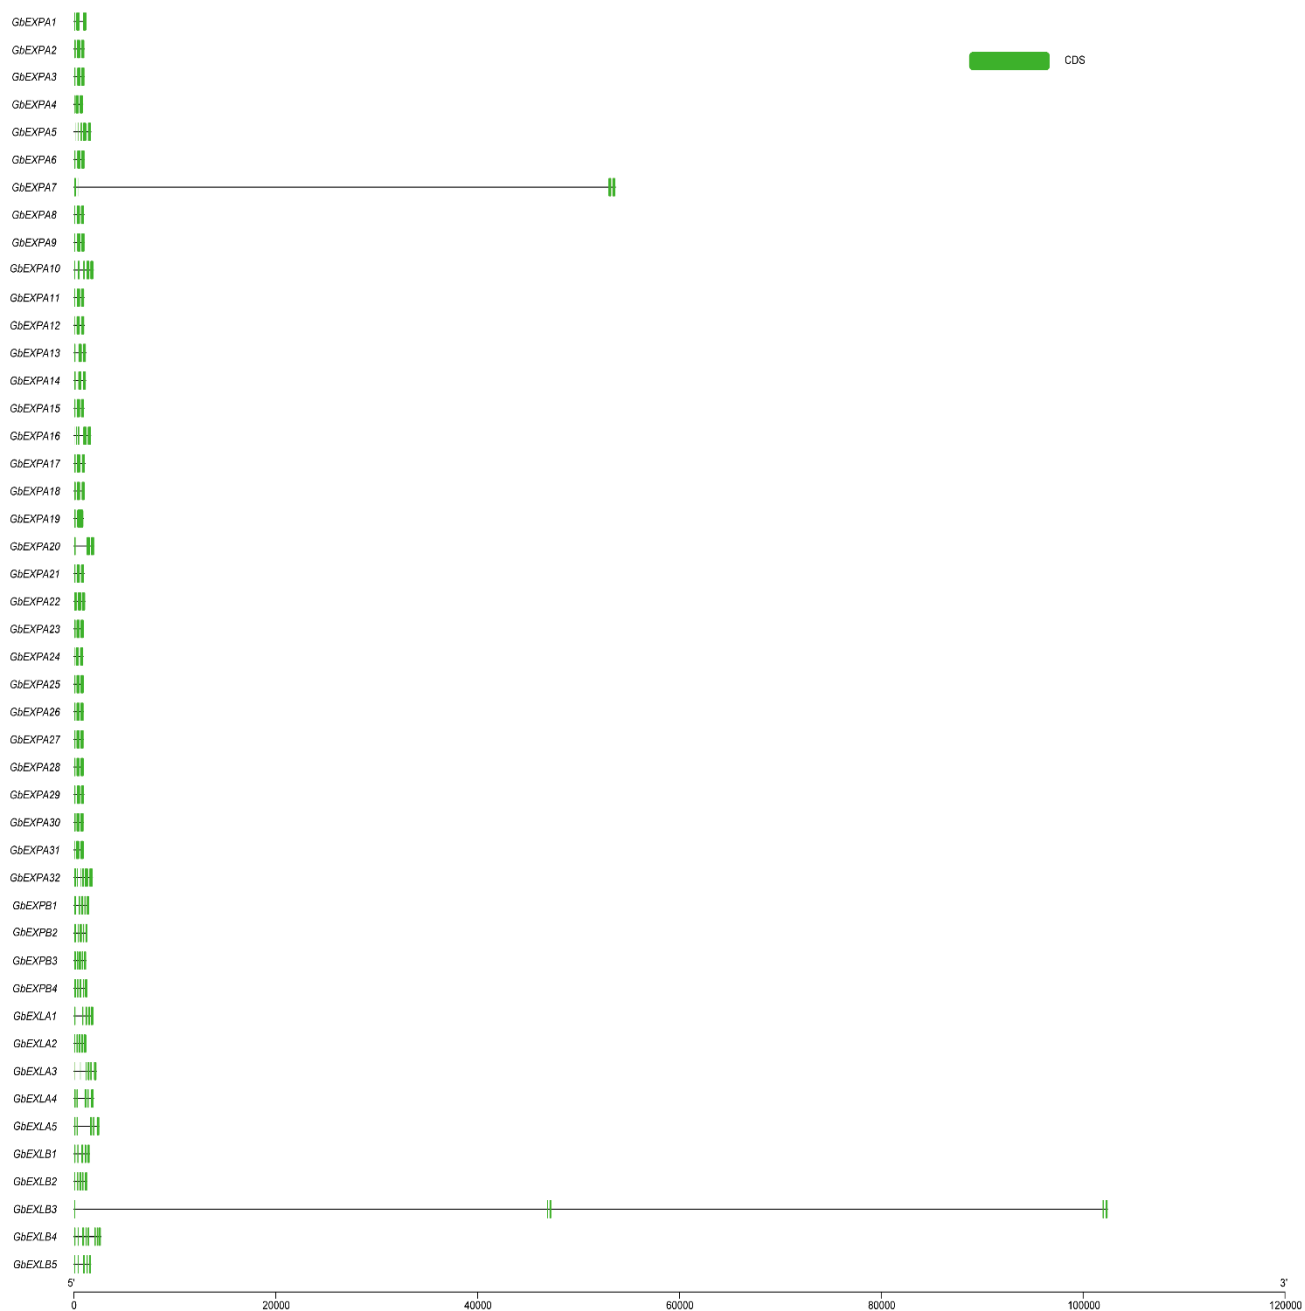

Figure S5. The exon-intron structures of *GbEXP* members.

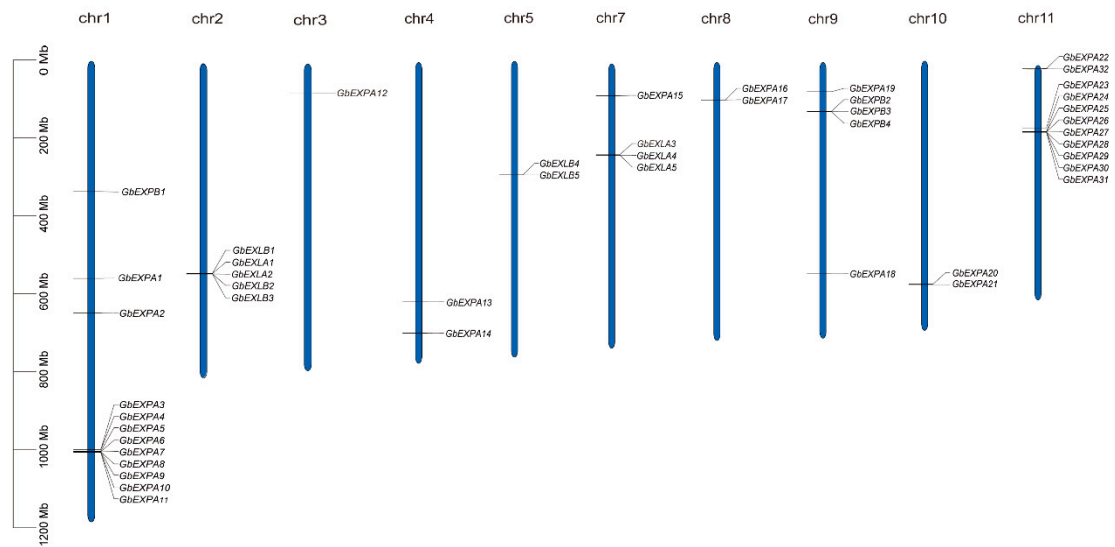

Figure.S6. Physical chromosomal locations of *GbEXPs*

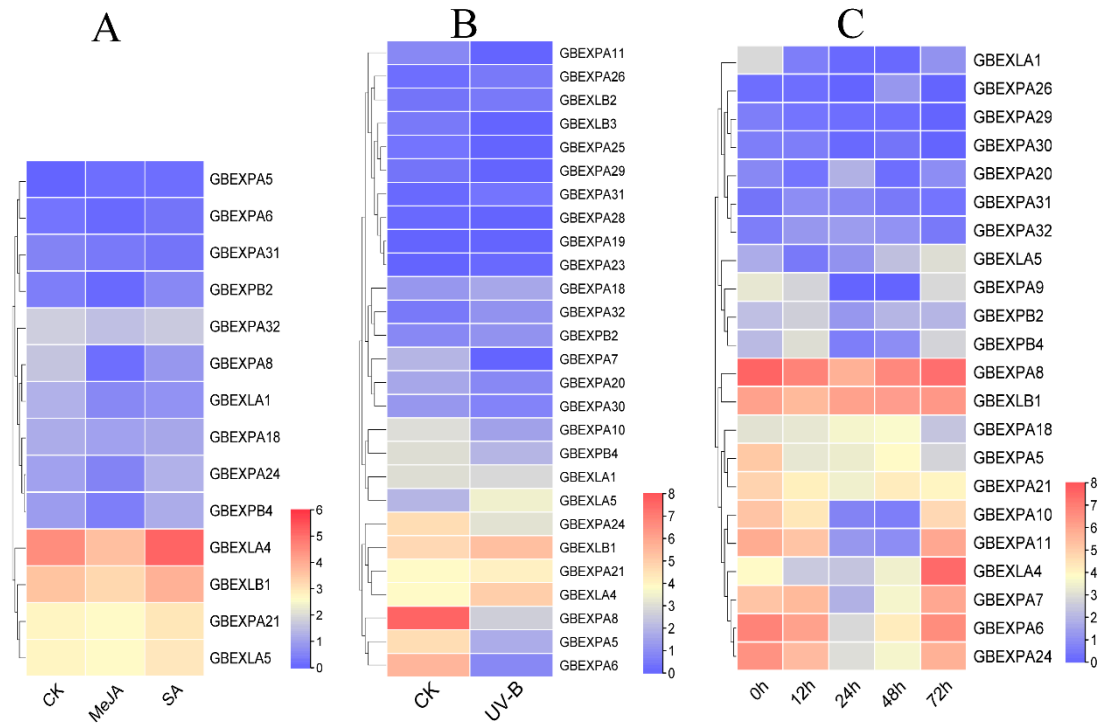

Figure.S7. Heatmap of *GbEXPs* expression in response to abiotic stress. (A) Expression profile of *GbEXPs* under methyl jasmonate (MeJA) and salicylic acid (SA) treatments. (B) Expression profile of *GbEXPs* under UV-B exposure. (C) Expression profile of *GbEXPs* under PEG-6000 stress.
