# Supplementary material for: Genome-Wide Identification of Expansin Gene Family and Their Response under Hormone Exposure in Ginkgo biloba L
Source: MDPI journal article supplement (doi:10.3390/ijms24065901), 2023-03-21
Supplement: s1 [file s1]

|         |                 |              |      |       |
|---------|-----------------|--------------|------|-------|
| GbEXPA1 | Box 4           | ATTAAT       | 740  | 6 +   |
| GbEXPA1 | ARE             | AAACCA       | 150  | 6 +   |
| GbEXPA1 | ARE             | AAACCA       | 652  | 6 -   |
| GbEXPA1 | TCT-motif       | TCTTAC       | 1054 | 6 -   |
| GbEXPA1 | CGTCA-motif     | CGTCA        | 1386 | 5 +   |
| GbEXPA1 | GCN4_motif      | TGAGTCA      | 1330 | 7 +   |
| GbEXPA1 | P-box           | CCTTTTG      | 1678 | 7 +   |
| GbEXPA1 | P-box           | CCTTTTG      | 1832 | 7 +   |
| GbEXPA1 | GT1-motif       | GGTTAA       | 123  | 6 -   |
| GbEXPA1 | GT1-motif       | GGTTAA       | 991  | 6 +   |
| GbEXPA1 | GT1-motif       | GGTTAA       | 1291 | 6 +   |
| GbEXPA1 | AuxRR-core      | GGTCCAT      | 224  | 7 +   |
| GbEXPA1 | ABRE            | ACGTG        | 806  | 5 -   |
| GbEXPA1 | G-box           | TACGTG       | 806  | 6 -   |
| GbEXPA1 | GATA-motif      | AAGGATAAGC   | 1500 | 9 +   |
| GbEXPA1 | MRE             | AACCTAA      | 672  | 7 +   |
| GbEXPA1 | CAAT-box        | CAAT         | 1    | 5 +   |
| GbEXPA1 | TC-rich repeats | GTTTTCTTAC   | 1187 | 9 +   |
| GbEXPA1 | TGACG-motif     | TGACG        | 1386 | 5 -   |
| GbEXPA2 | ACE             | GACACGTATG   | 551  | 9 +   |
| GbEXPA2 | ACE             | GACACGTATG   | 1351 | 9 +   |
| GbEXPA2 | ABRE            | ACGTG        | 1353 | 5 -   |
| GbEXPA2 | ABRE            | CACGTG       | 1426 | 6 -   |
| GbEXPA2 | ABRE            | ACGTG        | 1427 | 5 +   |
| GbEXPA2 | ABRE            | ACGTG        | 1691 | 5 +   |
| GbEXPA2 | P-box           | CCTTTTG      | 39   | 7 -   |
| GbEXPA2 | ATCT-motif      | AATCTAATCC   | 710  | 9 +   |
| GbEXPA2 | G-Box           | CACGTG       | 1426 | 6 -   |
| GbEXPA2 | G-Box           | CACGTT       | 1690 | 6 -   |
| GbEXPA2 | CGTCA-motif     | CGTCA        | 577  | 5 -   |
| GbEXPA2 | TCT-motif       | TCTTAC       | 280  | 6 -   |
| GbEXPA2 | TCT-motif       | TCTTAC       | 588  | 6 -   |
| GbEXPA2 | RY-element      | CATGCATG     | 744  | 8 +   |
| GbEXPA2 | Box 4           | ATTAAT       | 250  | 6 +   |
| GbEXPA2 | Box 4           | ATTAAT       | 1990 | 6 -   |
| GbEXPA2 | HD-Zip 1        | CAAT(A/T)ATT | 1540 | 8.5 - |
| GbEXPA2 | Gap-box         | CAAATGAA(A/  | 1009 | 9.5 + |
| GbEXPA2 | Box II          | TGGTAATAA    | 185  | 9 -   |
| GbEXPA2 | TGACG-motif     | TGACG        | 577  | 5 +   |
| GbEXPA2 | I-box           | cCATATCCAAT  | 1947 | 10 -  |
| GbEXPA2 | TC-rich repeats | GTTTTCTTAC   | 280  | 9 -   |
| GbEXPA2 | TC-rich repeats | GTTTTCTTAC   | 424  | 9 -   |
| GbEXPA2 | AE-box          | AGAAACAA     | 1227 | 8 +   |
| GbEXPA2 | A-box           | CCGTCC       | 1722 | 6 -   |
| GbEXPA2 | MRE             | AACCTAA      | 313  | 7 -   |
| GbEXPA2 | MRE             | AACCTAA      | 457  | 7 -   |

|         |                 |            |      |      |
|---------|-----------------|------------|------|------|
| GbEXPA2 | G-box           | TACGTG     | 1353 | 6 -  |
| GbEXPA2 | G-box           | GCCACGTGGA | 1424 | 9 -  |
| GbEXPA2 | G-box           | CACGTG     | 1426 | 6 -  |
| GbEXPA2 | LTR             | CCGAAA     | 1395 | 6 +  |
| GbEXPA3 | GARE-motif      | TCTGTTG    | 1803 | 7 +  |
| GbEXPA3 | AT-rich element | ATAGAAATCA | 1070 | 10 + |
| GbEXPA3 | G-box           | TAAACGTG   | 1015 | 8 +  |
| GbEXPA3 | G-box           | CACGAC     | 1052 | 6 -  |
| GbEXPA3 | G-box           | CACGTC     | 1181 | 6 +  |
| GbEXPA3 | TC-rich repeats | ATTCTCTAAC | 1965 | 9 +  |
| GbEXPA3 | Box 4           | ATTAAT     | 925  | 6 +  |
| GbEXPA3 | Box 4           | ATTAAT     | 1007 | 6 -  |
| GbEXPA3 | Box 4           | ATTAAT     | 1252 | 6 -  |
| GbEXPA3 | Box 4           | ATTAAT     | 1585 | 6 -  |
| GbEXPA3 | G-Box           | CACGTT     | 639  | 6 -  |
| GbEXPA3 | G-Box           | CACGTT     | 1017 | 6 -  |
| GbEXPA3 | TCA-element     | TCAGAAGAGG | 1095 | 10 - |
| GbEXPA3 | GCN4_motif      | TGAGTCA    | 220  | 7 +  |
| GbEXPA3 | ABRE            | ACGTG      | 640  | 5 +  |
| GbEXPA3 | ABRE            | ACGTG      | 1018 | 5 +  |
| GbEXPA3 | ABRE            | ACGTG      | 1181 | 5 -  |
| GbEXPA3 | ABRE            | GCAACGTGTC | 1352 | 9 -  |
| GbEXPA3 | AuxRR-core      | GGTCCAT    | 7    | 7 +  |
| GbEXPA3 | AuxRR-core      | GGTCCAT    | 12   | 7 -  |
| GbEXPA4 | Box 4           | ATTAAT     | 527  | 6 +  |
| GbEXPA4 | Box 4           | ATTAAT     | 1053 | 6 -  |
| GbEXPA4 | Box 4           | ATTAAT     | 1298 | 6 -  |
| GbEXPA4 | Box 4           | ATTAAT     | 1631 | 6 -  |
| GbEXPA4 | G-Box           | CACGTT     | 802  | 6 -  |
| GbEXPA4 | G-Box           | CACGTT     | 1063 | 6 -  |
| GbEXPA4 | GCN4_motif      | TGAGTCA    | 447  | 7 +  |
| GbEXPA4 | TCA-element     | TCAGAAGAGG | 1141 | 10 - |
| GbEXPA4 | AuxRR-core      | GGTCCAT    | 234  | 7 +  |
| GbEXPA4 | AuxRR-core      | GGTCCAT    | 239  | 7 -  |
| GbEXPA4 | ABRE            | ACGTG      | 803  | 5 +  |
| GbEXPA4 | ABRE            | ACGTG      | 1064 | 5 +  |
| GbEXPA4 | ABRE            | ACGTG      | 1227 | 5 -  |
| GbEXPA4 | ABRE            | GCAACGTGTC | 1398 | 9 -  |
| GbEXPA4 | AT-rich element | ATAGAAATCA | 1116 | 10 + |
| GbEXPA4 | GARE-motif      | TCTGTTG    | 1849 | 7 +  |
| GbEXPA4 | G-box           | TAAACGTG   | 1061 | 8 +  |
| GbEXPA4 | G-box           | CACGAC     | 1098 | 6 -  |
| GbEXPA4 | G-box           | CACGTC     | 1227 | 6 +  |
| GbEXPA4 | A-box           | CCGTCC     | 1280 | 6 -  |
| GbEXPA5 | AE-box          | AGAAACAA   | 1412 | 8 -  |
| GbEXPA5 | A-box           | CCGTCC     | 1730 | 6 +  |

|         |                 |              |      |       |
|---------|-----------------|--------------|------|-------|
| GbEXPA5 | TGACG-motif     | TGACG        | 523  | 5 +   |
| GbEXPA5 | TGACG-motif     | TGACG        | 1660 | 5 +   |
| GbEXPA5 | TGACG-motif     | TGACG        | 1720 | 5 +   |
| GbEXPA5 | G-box           | TACGTG       | 129  | 6 -   |
| GbEXPA5 | chs-CMA1a       | TTACTTAA     | 1535 | 8 +   |
| GbEXPA5 | MRE             | AACCTAA      | 881  | 7 +   |
| GbEXPA5 | TCA-element     | CCATCTTTTT   | 168  | 9 -   |
| GbEXPA5 | ABRE            | ACGTG        | 129  | 5 -   |
| GbEXPA5 | AuxRR-core      | GGTCCAT      | 46   | 7 +   |
| GbEXPA5 | TCT-motif       | TCTTAC       | 39   | 6 -   |
| GbEXPA5 | AT1-motif       | AATTATTTTTT  | 672  | 13 -  |
| GbEXPA5 | ARE             | AAACCA       | 973  | 6 -   |
| GbEXPA5 | ARE             | AAACCA       | 1682 | 6 -   |
| GbEXPA5 | ARE             | AAACCA       | 1994 | 6 -   |
| GbEXPA5 | Box 4           | ATTAAT       | 455  | 6 +   |
| GbEXPA5 | CGTCA-motif     | CGTCA        | 523  | 5 -   |
| GbEXPA5 | CGTCA-motif     | CGTCA        | 1660 | 5 -   |
| GbEXPA5 | CGTCA-motif     | CGTCA        | 1720 | 5 -   |
| GbEXPA5 | MBS             | CAACTG       | 1932 | 6 -   |
| GbEXPA6 | AT-rich element | ATAGAAATCA   | 1261 | 10 -  |
| GbEXPA6 | G-box           | CACGTC       | 471  | 6 -   |
| GbEXPA6 | TGACG-motif     | TGACG        | 641  | 5 +   |
| GbEXPA6 | TGACG-motif     | TGACG        | 832  | 5 +   |
| GbEXPA6 | TGACG-motif     | TGACG        | 1755 | 5 -   |
| GbEXPA6 | TCCC-motif      | TCTCCCT      | 1862 | 7 +   |
| GbEXPA6 | MBS             | CAACTG       | 75   | 6 -   |
| GbEXPA6 | MBS             | CAACTG       | 281  | 6 +   |
| GbEXPA6 | MBS             | CAACTG       | 945  | 6 -   |
| GbEXPA6 | G-Box           | CACGTT       | 1814 | 6 -   |
| GbEXPA6 | CGTCA-motif     | CGTCA        | 641  | 5 -   |
| GbEXPA6 | CGTCA-motif     | CGTCA        | 832  | 5 -   |
| GbEXPA6 | CGTCA-motif     | CGTCA        | 1755 | 5 +   |
| GbEXPA6 | Box 4           | ATTAAT       | 424  | 6 +   |
| GbEXPA6 | Box 4           | ATTAAT       | 548  | 6 +   |
| GbEXPA6 | Box 4           | ATTAAT       | 1158 | 6 -   |
| GbEXPA6 | Box 4           | ATTAAT       | 1220 | 6 -   |
| GbEXPA6 | HD-Zip 1        | CAAT(A/T)ATT | 1083 | 8.5 - |
| GbEXPA6 | ABRE            | ACGTG        | 472  | 5 +   |
| GbEXPA6 | ABRE            | ACGTG        | 1815 | 5 +   |
| GbEXPA6 | P-box           | CCTTTTG      | 17   | 7 -   |
| GbEXPA7 | Box 4           | ATTAAT       | 528  | 6 +   |
| GbEXPA7 | Box 4           | ATTAAT       | 1054 | 6 -   |
| GbEXPA7 | Box 4           | ATTAAT       | 1298 | 6 -   |
| GbEXPA7 | Box 4           | ATTAAT       | 1631 | 6 -   |
| GbEXPA7 | G-Box           | CACGTT       | 803  | 6 -   |
| GbEXPA7 | G-Box           | CACGTT       | 1064 | 6 -   |

|         |             |               |      |       |
|---------|-------------|---------------|------|-------|
| GbEXPA7 | MBS         | CAACTG        | 1680 | 6 -   |
| GbEXPA7 | GCN4_motif  | TGAGTCA       | 448  | 7 +   |
| GbEXPA7 | TCA-element | TCAGAAGAGG    | 1142 | 10 -  |
| GbEXPA7 | AuxRR-core  | GGTCCAT       | 235  | 7 +   |
| GbEXPA7 | AuxRR-core  | GGTCCAT       | 240  | 7 -   |
| GbEXPA7 | ABRE        | ACGTG         | 804  | 5 +   |
| GbEXPA7 | ABRE        | ACGTG         | 1065 | 5 +   |
| GbEXPA7 | ABRE        | ACGTG         | 1228 | 5 -   |
| GbEXPA7 | ABRE        | GCAACGTGTC    | 1398 | 9 -   |
| GbEXPA7 | G-box       | TAAACGTG      | 1062 | 8 +   |
| GbEXPA7 | G-box       | CACGAC        | 1099 | 6 -   |
| GbEXPA7 | G-box       | CACGTC        | 1228 | 6 +   |
| GbEXPA7 | GARE-motif  | TCTGTTG       | 1849 | 7 +   |
| GbEXPA8 | TGACG-motif | TGACG         | 1510 | 5 +   |
| GbEXPA8 | G-box       | CACGTG        | 897  | 6 +   |
| GbEXPA8 | GATA-motif  | AAGGATAAGG    | 1245 | 9 +   |
| GbEXPA8 | GATA-motif  | AAGGATAAGG    | 1422 | 9 -   |
| GbEXPA8 | GARE-motif  | TCTGTTG       | 1833 | 7 +   |
| GbEXPA8 | LTR         | CCGAAA        | 1841 | 6 -   |
| GbEXPA8 | GT1-motif   | GTGTGTGAA     | 584  | 9 -   |
| GbEXPA8 | GT1-motif   | GGTTAA        | 1414 | 6 -   |
| GbEXPA8 | ABRE        | CGTACGTGCA    | 1    | 9 -   |
| GbEXPA8 | ABRE        | CACGTG        | 897  | 6 +   |
| GbEXPA8 | ABRE        | ACGTG         | 898  | 5 +   |
| GbEXPA8 | CGTCA-motif | CGTCA         | 1510 | 5 -   |
| GbEXPA8 | G-Box       | CACGTG        | 897  | 6 +   |
| GbEXPA8 | MBS         | CAACTG        | 741  | 6 +   |
| GbEXPA8 | MBS         | CAACTG        | 1692 | 6 -   |
| GbEXPA8 | O2-site     | GATGA(C/T)(A/ | 1774 | 8.5 - |
| GbEXPA8 | Gap-box     | CAAATGAA(A/   | 1878 | 9.5 - |
| GbEXPA8 | Box 4       | ATTAAT        | 85   | 6 +   |
| GbEXPA8 | Box 4       | ATTAAT        | 239  | 6 +   |
| GbEXPA8 | Box 4       | ATTAAT        | 658  | 6 +   |
| GbEXPA8 | Box 4       | ATTAAT        | 1321 | 6 -   |
| GbEXPA8 | Box 4       | ATTAAT        | 1637 | 6 -   |
| GbEXPA9 | P-box       | TTCCAACAAA(   | 210  | 13 +  |
| GbEXPA9 | AACA_motif  | TAACAAACTC(   | 213  | 11 +  |
| GbEXPA9 | GCN4_motif  | TGAGTCA       | 1192 | 7 -   |
| GbEXPA9 | AuxRR-core  | GGTCCAT       | 396  | 7 -   |
| GbEXPA9 | AuxRR-core  | GGTCCAT       | 1623 | 7 +   |
| GbEXPA9 | GT1-motif   | GGTTAAT       | 304  | 7 -   |
| GbEXPA9 | GT1-motif   | GGTTAA        | 305  | 6 -   |
| GbEXPA9 | ABRE        | ACGTG         | 421  | 5 +   |
| GbEXPA9 | Box 4       | ATTAAT        | 407  | 6 +   |
| GbEXPA9 | CAT-box     | GCCACT        | 817  | 6 +   |
| GbEXPA9 | CGTCA-motif | CGTCA         | 419  | 5 -   |

|          |                 |            |      |      |
|----------|-----------------|------------|------|------|
| GbEXPA9  | CGTCA-motif     | CGTCA      | 1231 | 5 -  |
| GbEXPA9  | CGTCA-motif     | CGTCA      | 1255 | 5 +  |
| GbEXPA9  | TGACG-motif     | TGACG      | 419  | 5 +  |
| GbEXPA9  | TGACG-motif     | TGACG      | 1231 | 5 +  |
| GbEXPA9  | TGACG-motif     | TGACG      | 1255 | 5 -  |
| GbEXPA9  | TC-rich repeats | ATTCTCTAAC | 688  | 9 -  |
| GbEXPA9  | TGA-element     | AACGAC     | 1238 | 6 +  |
| GbEXPA9  | G-box           | CACGTC     | 420  | 6 -  |
| GbEXPA9  | G-box           | CACGAC     | 660  | 6 +  |
| GbEXPA9  | G-box           | CACGAC     | 1166 | 6 -  |
| GbEXPA10 | TGACG-motif     | TGACG      | 284  | 5 +  |
| GbEXPA10 | TGACG-motif     | TGACG      | 1143 | 5 -  |
| GbEXPA10 | TGACG-motif     | TGACG      | 1630 | 5 +  |
| GbEXPA10 | TGA-element     | AACGAC     | 1242 | 6 -  |
| GbEXPA10 | GARE-motif      | TCTGTTG    | 1162 | 7 +  |
| GbEXPA10 | G-box           | TACGTG     | 1708 | 6 +  |
| GbEXPA10 | G-box           | TACGTG     | 1755 | 6 +  |
| GbEXPA10 | P-box           | CCTTTTG    | 392  | 7 +  |
| GbEXPA10 | ACE             | GACACGTATG | 1706 | 9 -  |
| GbEXPA10 | ABRE            | ACGTG      | 904  | 5 +  |
| GbEXPA10 | ABRE            | ACGTG      | 1045 | 5 -  |
| GbEXPA10 | ABRE            | GACACGTACG | 1705 | 10 - |
| GbEXPA10 | ABRE            | TACGTGTC   | 1708 | 8 +  |
| GbEXPA10 | ABRE            | ACGTG      | 1709 | 5 +  |
| GbEXPA10 | ABRE            | ACGTG      | 1756 | 5 +  |
| GbEXPA10 | ABRE            | ACGTG      | 1816 | 5 -  |
| GbEXPA10 | Box 4           | ATTAAT     | 323  | 6 +  |
| GbEXPA10 | Box 4           | ATTAAT     | 561  | 6 +  |
| GbEXPA10 | Box 4           | ATTAAT     | 1482 | 6 -  |
| GbEXPA10 | Box 4           | ATTAAT     | 1740 | 6 -  |
| GbEXPA10 | CAT-box         | GCCACT     | 623  | 6 -  |
| GbEXPA10 | TCT-motif       | TCTTAC     | 158  | 6 +  |
| GbEXPA10 | TCT-motif       | TCTTAC     | 495  | 6 +  |
| GbEXPA10 | ARE             | AAACCA     | 1167 | 6 -  |
| GbEXPA10 | O2-site         | GATGATGTGG | 1468 | 9 -  |
| GbEXPA10 | ATCT-motif      | AATCTAATCC | 1530 | 9 +  |
| GbEXPA10 | ATCT-motif      | AATCTAATCC | 1593 | 9 -  |
| GbEXPA10 | CGTCA-motif     | CGTCA      | 284  | 5 -  |
| GbEXPA10 | CGTCA-motif     | CGTCA      | 1143 | 5 +  |
| GbEXPA10 | CGTCA-motif     | CGTCA      | 1630 | 5 -  |
| GbEXPA10 | G-Box           | CACGTT     | 903  | 6 -  |
| GbEXPA10 | G-Box           | CACGTT     | 1045 | 6 +  |
| GbEXPA10 | G-Box           | CACGTT     | 1816 | 6 +  |
| GbEXPA11 | G-box           | TACGTG     | 331  | 6 -  |
| GbEXPA11 | G-box           | CACGTG     | 497  | 6 +  |
| GbEXPA11 | G-box           | TAAACGTG   | 667  | 8 +  |

|          |             |            |      |     |
|----------|-------------|------------|------|-----|
| GbEXPA11 | G-box       | CACGTC     | 690  | 6 - |
| GbEXPA11 | I-box       | GTATAAGGCC | 334  | 9 + |
| GbEXPA11 | I-box       | TGATAATGT  | 1917 | 9 + |
| GbEXPA11 | TGACG-motif | TGACG      | 394  | 5 - |
| GbEXPA11 | TGACG-motif | TGACG      | 559  | 5 + |
| GbEXPA11 | TGACG-motif | TGACG      | 1288 | 5 + |
| GbEXPA11 | Box 4       | ATTAAT     | 1099 | 6 - |
| GbEXPA11 | Box 4       | ATTAAT     | 1103 | 6 - |
| GbEXPA11 | ARE         | AAACCA     | 183  | 6 - |
| GbEXPA11 | ARE         | AAACCA     | 1122 | 6 + |
| GbEXPA11 | ARE         | AAACCA     | 1834 | 6 - |
| GbEXPA11 | CGTCA-motif | CGTCA      | 394  | 5 + |
| GbEXPA11 | CGTCA-motif | CGTCA      | 559  | 5 - |
| GbEXPA11 | CGTCA-motif | CGTCA      | 1288 | 5 - |
| GbEXPA11 | G-Box       | CACGTG     | 497  | 6 + |
| GbEXPA11 | G-Box       | CACGTT     | 669  | 6 - |
| GbEXPA11 | GT1-motif   | GGTTAA     | 137  | 6 - |
| GbEXPA11 | ABRE        | ACGTG      | 331  | 5 - |
| GbEXPA11 | ABRE        | GACACGTGGC | 495  | 9 + |
| GbEXPA11 | ABRE        | CACGTG     | 497  | 6 + |
| GbEXPA11 | ABRE        | ACGTG      | 498  | 5 + |
| GbEXPA11 | ABRE        | ACGTG      | 670  | 5 + |
| GbEXPA11 | ABRE        | ACGTG      | 691  | 5 + |
| GbEXPB1  | O2-site     | GTTGACGTGA | 57   | 9 + |
| GbEXPB1  | O2-site     | GATGACATGG | 351  | 9 + |
| GbEXPB1  | O2-site     | GATGACATGG | 386  | 9 - |
| GbEXPB1  | CAT-box     | GCCACT     | 865  | 6 + |
| GbEXPB1  | RY-element  | CATGCATG   | 1455 | 8 - |
| GbEXPB1  | Box 4       | ATTAAT     | 28   | 6 + |
| GbEXPB1  | Box 4       | ATTAAT     | 168  | 6 + |
| GbEXPB1  | Box 4       | ATTAAT     | 735  | 6 + |
| GbEXPB1  | G-Box       | CACGTT     | 1289 | 6 - |
| GbEXPB1  | G-Box       | CACGTG     | 1757 | 6 - |
| GbEXPB1  | CGTCA-motif | CGTCA      | 1436 | 5 - |
| GbEXPB1  | CGTCA-motif | CGTCA      | 1698 | 5 - |
| GbEXPB1  | CGTCA-motif | CGTCA      | 1754 | 5 + |
| GbEXPB1  | MBS         | CAACTG     | 1432 | 6 - |
| GbEXPB1  | MBS         | CAACTG     | 1825 | 6 - |
| GbEXPB1  | MBS         | CAACTG     | 1832 | 6 - |
| GbEXPB1  | MBS         | CAACTG     | 1914 | 6 + |
| GbEXPB1  | ABRE        | ACGTG      | 1290 | 5 + |
| GbEXPB1  | ABRE        | CACGTG     | 1757 | 6 - |
| GbEXPB1  | ABRE        | ACGTG      | 1758 | 5 + |
| GbEXPB1  | GT1-motif   | GGTTAA     | 49   | 6 + |
| GbEXPB1  | GT1-motif   | GGTTAA     | 85   | 6 - |
| GbEXPB1  | GT1-motif   | GGTTAA     | 109  | 6 + |

|          |                 |            |      |      |
|----------|-----------------|------------|------|------|
| GbEXPB1  | GT1-motif       | GGTTAA     | 198  | 6 -  |
| GbEXPB1  | LTR             | CCGAAA     | 1841 | 6 -  |
| GbEXPB1  | GC-motif        | CCCCCG     | 1529 | 6 +  |
| GbEXPB1  | GC-motif        | CCCCCG     | 1893 | 6 -  |
| GbEXPB1  | G-box           | GCCACGTGGA | 1755 | 9 +  |
| GbEXPB1  | G-box           | CACGTG     | 1757 | 6 -  |
| GbEXPB1  | TGA-element     | AACGAC     | 1507 | 6 -  |
| GbEXPB1  | TGA-element     | AACGAC     | 1547 | 6 +  |
| GbEXPB1  | GATA-motif      | AAGGATAAGG | 1015 | 9 +  |
| GbEXPB1  | A-box           | CCGTCC     | 1402 | 6 +  |
| GbEXPB1  | I-box           | gGATAAGGTG | 1651 | 9 -  |
| GbEXPB1  | TC-rich repeats | ATTCTCTAAC | 773  | 9 +  |
| GbEXPB1  | TC-rich repeats | ATTCTCTAAC | 969  | 9 -  |
| GbEXPB1  | TGACG-motif     | TGACG      | 1436 | 5 +  |
| GbEXPB1  | TGACG-motif     | TGACG      | 1698 | 5 +  |
| GbEXPB1  | TGACG-motif     | TGACG      | 1754 | 5 -  |
| GbEXPA20 | ATC-motif       | AGCTATCCA  | 761  | 9 +  |
| GbEXPA20 | CAG-motif       | GAAAGGCAGA | 170  | 10 + |
| GbEXPA20 | chs-CMA1a       | TTACTTAA   | 819  | 8 +  |
| GbEXPA20 | G-box           | CACGTC     | 774  | 6 +  |
| GbEXPA20 | G-box           | CACGTG     | 1835 | 6 -  |
| GbEXPA20 | GATA-motif      | AAGGATAAGG | 1673 | 9 +  |
| GbEXPA20 | TGA-element     | AACGAC     | 777  | 6 -  |
| GbEXPA20 | TCA-element     | CCATCTTTTT | 1    | 9 +  |
| GbEXPA20 | P-box           | CCTTTTG    | 1361 | 7 -  |
| GbEXPA20 | GT1-motif       | GGTTAA     | 1876 | 6 +  |
| GbEXPA20 | ABRE            | ACGTG      | 774  | 5 -  |
| GbEXPA20 | ABRE            | CACGTG     | 1835 | 6 -  |
| GbEXPA20 | ABRE            | ACGTG      | 1836 | 5 +  |
| GbEXPA20 | O2-site         | GATGATGTGG | 863  | 9 -  |
| GbEXPA20 | Box 4           | ATTAAT     | 941  | 6 +  |
| GbEXPA20 | Box 4           | ATTAAT     | 1503 | 6 -  |
| GbEXPA20 | CAT-box         | GCCACT     | 1223 | 6 +  |
| GbEXPA20 | CAT-box         | GCCACT     | 1657 | 6 -  |
| GbEXPA20 | TCT-motif       | TCTTAC     | 981  | 6 +  |
| GbEXPA20 | G-Box           | CACGTG     | 1835 | 6 -  |
| GbEXPA21 | TCCC-motif      | TCTCCCT    | 330  | 7 +  |
| GbEXPA21 | TGACG-motif     | TGACG      | 1487 | 5 +  |
| GbEXPA21 | TC-rich repeats | ATTCTCTAAC | 1193 | 9 -  |
| GbEXPA21 | LTR             | CCGAAA     | 885  | 6 +  |
| GbEXPA21 | LTR             | CCGAAA     | 1500 | 6 -  |
| GbEXPA21 | TGA-element     | AACGAC     | 1982 | 6 -  |
| GbEXPA21 | G-box           | CACGAC     | 1391 | 6 -  |
| GbEXPA21 | P-box           | CCTTTTG    | 201  | 7 +  |
| GbEXPA21 | AuxRR-core      | GGTCCAT    | 1744 | 7 -  |
| GbEXPA21 | ABRE            | ACGTG      | 1715 | 5 +  |

|          |                 |             |      |      |
|----------|-----------------|-------------|------|------|
| GbEXPA21 | Box 4           | ATTAAT      | 126  | 6 +  |
| GbEXPA21 | CAT-box         | GCCACT      | 1413 | 6 +  |
| GbEXPA21 | CGTCA-motif     | CGTCA       | 1487 | 5 -  |
| GbEXPA21 | G-Box           | CACGTT      | 1714 | 6 -  |
| GbEXPA22 | G-box           | TACGTG      | 1149 | 6 +  |
| GbEXPA22 | TGACG-motif     | TGACG       | 1260 | 5 +  |
| GbEXPA22 | TC-rich repeats | ATTCTCTAAC  | 998  | 9 +  |
| GbEXPA22 | I-box           | cCATATCCAAT | 97   | 10 + |
| GbEXPA22 | CGTCA-motif     | CGTCA       | 1260 | 5 -  |
| GbEXPA22 | Box 4           | ATTAAT      | 2    | 6 +  |
| GbEXPA22 | Box 4           | ATTAAT      | 342  | 6 +  |
| GbEXPA22 | Box 4           | ATTAAT      | 490  | 6 +  |
| GbEXPA22 | Box 4           | ATTAAT      | 550  | 6 +  |
| GbEXPA22 | Box 4           | ATTAAT      | 953  | 6 +  |
| GbEXPA22 | CAT-box         | GCCACT      | 779  | 6 -  |
| GbEXPA22 | CAT-box         | GCCACT      | 1529 | 6 +  |
| GbEXPA22 | O2-site         | GATGATGTGG  | 1446 | 9 -  |
| GbEXPA22 | GT1-motif       | GGTTAAT     | 939  | 7 -  |
| GbEXPA22 | GT1-motif       | GGTTAA      | 940  | 6 -  |
| GbEXPA22 | ABRE            | GACACGTGGC  | 247  | 9 -  |
| GbEXPA22 | ABRE            | ACGTG       | 1150 | 5 +  |
| GbEXPA22 | GCN4_motif      | TGAGTCA     | 163  | 7 -  |
| GbEXPA23 | CGTCA-motif     | CGTCA       | 887  | 5 +  |
| GbEXPA23 | CGTCA-motif     | CGTCA       | 1227 | 5 +  |
| GbEXPA23 | G-Box           | CACGTG      | 876  | 6 +  |
| GbEXPA23 | G-Box           | CACGTT      | 1688 | 6 -  |
| GbEXPA23 | Box 4           | ATTAAT      | 856  | 6 +  |
| GbEXPA23 | Box 4           | ATTAAT      | 1595 | 6 -  |
| GbEXPA23 | CAT-box         | GCCACT      | 839  | 6 +  |
| GbEXPA23 | GT1-motif       | GGTTAA      | 1684 | 6 +  |
| GbEXPA23 | ABRE            | CACGTG      | 876  | 6 +  |
| GbEXPA23 | ABRE            | ACGTG       | 877  | 5 +  |
| GbEXPA23 | ABRE            | ACGTG       | 1689 | 5 +  |
| GbEXPA23 | Sp1             | GGGCGG      | 517  | 6 -  |
| GbEXPA23 | GATA-motif      | GATAGGG     | 828  | 7 +  |
| GbEXPA23 | G-box           | CACGTG      | 876  | 6 +  |
| GbEXPA23 | TGACG-motif     | TGACG       | 887  | 5 -  |
| GbEXPA23 | TGACG-motif     | TGACG       | 1227 | 5 -  |
| GbEXPA23 | I-box           | gGATAAGGTG  | 1362 | 9 -  |
| GbEXPA24 | GT1-motif       | GGTTAAT     | 1857 | 7 +  |
| GbEXPA24 | ABRE            | ACGTG       | 1525 | 5 -  |
| GbEXPA24 | CGTCA-motif     | CGTCA       | 1290 | 5 -  |
| GbEXPA24 | G-Box           | CACGTT      | 1525 | 6 +  |
| GbEXPA24 | O2-site         | GATGACATGG  | 291  | 9 +  |
| GbEXPA24 | Box 4           | ATTAAT      | 209  | 6 +  |
| GbEXPA24 | Box 4           | ATTAAT      | 1823 | 6 -  |



|          |                    |            |      |      |
|----------|--------------------|------------|------|------|
| GbEXPA24 | TGACG-motif        | TGACG      | 1290 | 5 +  |
| GbEXPA24 | AE-box             | AGAAACTT   | 426  | 8 +  |
| GbEXPA24 | TCCC-motif         | TCTCCCT    | 1201 | 7 -  |
| GbEXPA24 | GATA-motif         | GATAGGG    | 255  | 7 +  |
| GbEXPA24 | TATC-box           | TATCCCA    | 738  | 7 -  |
| GbEXPA25 | TGACG-motif        | TGACG      | 1134 | 5 -  |
| GbEXPA25 | TGACG-motif        | TGACG      | 1140 | 5 -  |
| GbEXPA25 | TGACG-motif        | TGACG      | 1250 | 5 -  |
| GbEXPA25 | 3-AF1 binding site | TAAGAGAGGA | 629  | 10 + |
| GbEXPA25 | TCCC-motif         | TCTCCCT    | 1904 | 7 -  |
| GbEXPA25 | MRE                | AACCTAA    | 100  | 7 +  |
| GbEXPA25 | MRE                | AACCTAA    | 704  | 7 -  |
| GbEXPA25 | G-box              | CACGTC     | 1592 | 6 +  |
| GbEXPA25 | TATC-box           | TATCCCA    | 1839 | 7 +  |
| GbEXPA25 | ABRE               | ACGTG      | 978  | 5 +  |
| GbEXPA25 | ABRE               | ACGTG      | 1592 | 5 -  |
| GbEXPA25 | ACE                | CTAACGTATT | 342  | 9 -  |
| GbEXPA25 | GT1-motif          | GGTTAAT    | 61   | 7 +  |
| GbEXPA25 | GT1-motif          | GGTTAA     | 649  | 6 -  |
| GbEXPA25 | GT1-motif          | GGTTAA     | 707  | 6 +  |
| GbEXPA25 | GT1-motif          | GGTTAA     | 1698 | 6 +  |
| GbEXPA25 | P-box              | CCTTTTG    | 983  | 7 +  |
| GbEXPA25 | MBS                | CAACTG     | 1426 | 6 -  |
| GbEXPA25 | G-Box              | CACGTT     | 977  | 6 -  |
| GbEXPA25 | CGTCA-motif        | CGTCA      | 1134 | 5 +  |
| GbEXPA25 | CGTCA-motif        | CGTCA      | 1140 | 5 +  |
| GbEXPA25 | CGTCA-motif        | CGTCA      | 1250 | 5 +  |
| GbEXPA25 | Box 4              | ATTAAT     | 1578 | 6 -  |
| GbEXPA25 | Box 4              | ATTAAT     | 1916 | 6 -  |
| GbEXPA26 | GC-motif           | CCCCCG     | 1311 | 6 -  |
| GbEXPA26 | LTR                | CCGAAA     | 1308 | 6 -  |
| GbEXPA26 | LTR                | CCGAAA     | 1472 | 6 +  |
| GbEXPA26 | TATC-box           | TATCCCA    | 1839 | 7 +  |
| GbEXPA26 | chs-CMA1a          | TTACTTAA   | 730  | 8 +  |
| GbEXPA26 | chs-CMA1a          | TTACTTAA   | 1250 | 8 +  |
| GbEXPA26 | G-box              | CACGTC     | 1594 | 6 +  |
| GbEXPA26 | GATA-motif         | GATAGGG    | 558  | 7 -  |
| GbEXPA26 | AE-box             | AGAAACAA   | 1556 | 8 -  |
| GbEXPA26 | TCCC-motif         | TCTCCCT    | 1353 | 7 -  |
| GbEXPA26 | TCCC-motif         | TCTCCCT    | 1904 | 7 -  |
| GbEXPA26 | GA-motif           | ATAGATAA   | 958  | 8 +  |
| GbEXPA26 | TGACG-motif        | TGACG      | 1106 | 5 -  |
| GbEXPA26 | TGACG-motif        | TGACG      | 1112 | 5 -  |
| GbEXPA26 | Box 4              | ATTAAT     | 718  | 6 +  |
| GbEXPA26 | Box 4              | ATTAAT     | 1580 | 6 -  |
| GbEXPA26 | Box 4              | ATTAAT     | 1916 | 6 -  |

|          |             |             |      |      |
|----------|-------------|-------------|------|------|
| GbEXPA26 | 4cl-CMA1b   | ATTCCGATAA/ | 1779 | 12 - |
| GbEXPA26 | CAT-box     | GCCACT      | 1460 | 6 -  |
| GbEXPA26 | CGTCA-motif | CGTCA       | 1106 | 5 +  |
| GbEXPA26 | CGTCA-motif | CGTCA       | 1112 | 5 +  |
| GbEXPA26 | G-Box       | CACGTT      | 905  | 6 -  |
| GbEXPA26 | G-Box       | CACGTT      | 936  | 6 -  |
| GbEXPA26 | P-box       | CCTTTTG     | 396  | 7 -  |
| GbEXPA26 | P-box       | CCTTTTG     | 942  | 7 +  |
| GbEXPA26 | GT1-motif   | GGTTAA      | 1700 | 6 +  |
| GbEXPA26 | ABRE        | ACGTG       | 906  | 5 +  |
| GbEXPA26 | ABRE        | ACGTG       | 937  | 5 +  |
| GbEXPA26 | ABRE        | ACGTG       | 1594 | 5 -  |
| GbEXPA26 | ACE         | GACACGTATG  | 1222 | 9 -  |
| GbEXPA27 | AE-box      | AGAAACAA    | 1560 | 8 -  |
| GbEXPA27 | GA-motif    | ATAGATAA    | 673  | 8 +  |
| GbEXPA27 | GA-motif    | ATAGATAA    | 1037 | 8 +  |
| GbEXPA27 | I-box       | cGATAAGGCG  | 944  | 9 +  |
| GbEXPA27 | TGACG-motif | TGACG       | 178  | 5 +  |
| GbEXPA27 | TGACG-motif | TGACG       | 1115 | 5 -  |
| GbEXPA27 | TATC-box    | TATCCCA     | 1842 | 7 +  |
| GbEXPA27 | G-box       | TAAACGTG    | 983  | 8 +  |
| GbEXPA27 | G-box       | CACGTC      | 1598 | 6 +  |
| GbEXPA27 | chs-CMA1a   | TTACTTAA    | 805  | 8 +  |
| GbEXPA27 | chs-CMA1a   | TTACTTAA    | 1259 | 8 +  |
| GbEXPA27 | P-box       | CCTTTTG     | 471  | 7 -  |
| GbEXPA27 | P-box       | CCTTTTG     | 991  | 7 +  |
| GbEXPA27 | P-box       | CCTTTTG     | 1021 | 7 +  |
| GbEXPA27 | ABRE        | ACGTG       | 986  | 5 +  |
| GbEXPA27 | ABRE        | ACGTG       | 1016 | 5 +  |
| GbEXPA27 | ABRE        | TACGGTC     | 1045 | 7 +  |
| GbEXPA27 | ABRE        | ACGTG       | 1598 | 5 -  |
| GbEXPA27 | GT1-motif   | GGTTAA      | 1704 | 6 +  |
| GbEXPA27 | CAT-box     | GCCACT      | 1467 | 6 -  |
| GbEXPA27 | CAT-box     | GCCACT      | 1471 | 6 +  |
| GbEXPA27 | ARE         | AAACCA      | 1206 | 6 -  |
| GbEXPA27 | Box 4       | ATTAAT      | 793  | 6 +  |
| GbEXPA27 | Box 4       | ATTAAT      | 1584 | 6 -  |
| GbEXPA27 | Box 4       | ATTAAT      | 1905 | 6 -  |
| GbEXPA27 | G-Box       | CACGTT      | 985  | 6 -  |
| GbEXPA27 | G-Box       | CACGTT      | 1015 | 6 -  |
| GbEXPA27 | CGTCA-motif | CGTCA       | 178  | 5 -  |
| GbEXPA27 | CGTCA-motif | CGTCA       | 1115 | 5 +  |
| GbEXPA28 | TGACG-motif | TGACG       | 677  | 5 +  |
| GbEXPA28 | TGACG-motif | TGACG       | 1123 | 5 -  |
| GbEXPA28 | TGACG-motif | TGACG       | 1129 | 5 -  |
| GbEXPA28 | A-box       | CCGTCC      | 1055 | 6 +  |

|          |                 |             |      |      |
|----------|-----------------|-------------|------|------|
| GbEXPA28 | TCCC-motif      | TCTCCCT     | 1893 | 7 -  |
| GbEXPA28 | G-box           | CACGAC      | 54   | 6 +  |
| GbEXPA28 | G-box           | CACGTC      | 678  | 6 -  |
| GbEXPA28 | G-box           | CACGTC      | 1583 | 6 +  |
| GbEXPA28 | chs-CMA1a       | TTACTTAA    | 1271 | 8 +  |
| GbEXPA28 | TATC-box        | TATCCCA     | 1830 | 7 +  |
| GbEXPA28 | ABRE            | ACGTG       | 493  | 5 +  |
| GbEXPA28 | ABRE            | ACGTG       | 679  | 5 +  |
| GbEXPA28 | ABRE            | ACGTG       | 938  | 5 +  |
| GbEXPA28 | ABRE            | ACGTG       | 1583 | 5 -  |
| GbEXPA28 | GT1-motif       | GGTTAA      | 1689 | 6 +  |
| GbEXPA28 | TCA-element     | CCATCTTTTT  | 507  | 9 -  |
| GbEXPA28 | TCA-element     | CCATCTTTTT  | 539  | 9 -  |
| GbEXPA28 | P-box           | CCTTTTG     | 973  | 7 +  |
| GbEXPA28 | G-Box           | CACGTT      | 492  | 6 -  |
| GbEXPA28 | G-Box           | CACGTT      | 937  | 6 -  |
| GbEXPA28 | CGTCA-motif     | CGTCA       | 677  | 5 -  |
| GbEXPA28 | CGTCA-motif     | CGTCA       | 1123 | 5 +  |
| GbEXPA28 | CGTCA-motif     | CGTCA       | 1129 | 5 +  |
| GbEXPA28 | MBS             | CAACTG      | 1419 | 6 -  |
| GbEXPA28 | O2-site         | GATGACATGG  | 1982 | 9 -  |
| GbEXPA28 | CAT-box         | GCCACT      | 596  | 6 -  |
| GbEXPA28 | CAT-box         | GCCACT      | 689  | 6 +  |
| GbEXPA28 | Box 4           | ATTAAT      | 46   | 6 +  |
| GbEXPA28 | Box 4           | ATTAAT      | 1569 | 6 -  |
| GbEXPA28 | Box 4           | ATTAAT      | 1905 | 6 -  |
| GbEXPA29 | GA-motif        | ATAGATAA    | 444  | 8 +  |
| GbEXPA29 | I-box           | GTATAAGGCC  | 254  | 9 +  |
| GbEXPA29 | I-box           | cCATATCCAAT | 1718 | 10 + |
| GbEXPA29 | TGA-element     | AACGAC      | 971  | 6 +  |
| GbEXPA29 | TGA-element     | AACGAC      | 1632 | 6 +  |
| GbEXPA29 | AT-rich element | ATAGAAATCA  | 1544 | 10 + |
| GbEXPA29 | GARE-motif      | TCTGTTG     | 665  | 7 -  |
| GbEXPA29 | GARE-motif      | TCTGTTG     | 1768 | 7 +  |
| GbEXPA29 | GATA-motif      | AAGGATAAGG  | 431  | 9 +  |
| GbEXPA29 | GATA-motif      | GATAGGA     | 1529 | 7 +  |
| GbEXPA29 | GATA-motif      | GATAGGA     | 1650 | 7 +  |
| GbEXPA29 | G-box           | TACGTG      | 946  | 6 -  |
| GbEXPA29 | G-box           | CACGTC      | 1063 | 6 +  |
| GbEXPA29 | TCA-element     | CCATCTTTTT  | 87   | 9 +  |
| GbEXPA29 | ABRE            | ACGTG       | 946  | 5 -  |
| GbEXPA29 | ABRE            | ACGTG       | 1063 | 5 -  |
| GbEXPA29 | Box 4           | ATTAAT      | 1200 | 6 -  |
| GbEXPA29 | MBS             | CAACTG      | 1481 | 6 -  |
| GbEXPA29 | ATCT-motif      | AATCTAATCC  | 326  | 9 -  |
| GbEXPA29 | ATCT-motif      | AATCTAATCC  | 1710 | 9 +  |

|          |                    |               |      |      |
|----------|--------------------|---------------|------|------|
| GbEXPA29 | ATCT-motif         | AATCTAATCC    | 1721 | 9 +  |
| GbEXPA30 | ATCT-motif         | AATCTAATCC    | 1198 | 9 +  |
| GbEXPA30 | CGTCA-motif        | CGTCA         | 1181 | 5 +  |
| GbEXPA30 | G-Box              | CACGTT        | 758  | 6 +  |
| GbEXPA30 | G-Box              | CACGTT        | 1017 | 6 -  |
| GbEXPA30 | Box 4              | ATTAAT        | 824  | 6 +  |
| GbEXPA30 | Box 4              | ATTAAT        | 1426 | 6 -  |
| GbEXPA30 | Box 4              | ATTAAT        | 1558 | 6 -  |
| GbEXPA30 | TCT-motif          | TCTTAC        | 628  | 6 -  |
| GbEXPA30 | O2-site            | GATGA(C/T)(A/ | 792  | 8 -  |
| GbEXPA30 | GT1-motif          | GTGTGTGAA     | 914  | 9 +  |
| GbEXPA30 | GT1-motif          | GGTTAA        | 1671 | 6 +  |
| GbEXPA30 | ABRE               | ACGTG         | 758  | 5 -  |
| GbEXPA30 | ABRE               | ACGTG         | 1018 | 5 +  |
| GbEXPA30 | ABRE               | ACGTG         | 1179 | 5 -  |
| GbEXPA30 | TGA-element        | AACGAC        | 293  | 6 -  |
| GbEXPA30 | G-box              | CACGTC        | 1179 | 6 +  |
| GbEXPA30 | 3-AF3 binding site | CACTATCTAAC   | 545  | 10 + |
| GbEXPA30 | TATC-box           | TATCCCA       | 197  | 7 -  |
| GbEXPA30 | Unnamed_1          | GGATTTTACAC   | 1148 | 11 + |
| GbEXPA30 | TGACG-motif        | TGACG         | 1181 | 5 -  |
| GbEXPA30 | GA-motif           | ATAGATAA      | 645  | 8 -  |
| GbEXPA30 | AE-box             | AGAAACAA      | 895  | 8 +  |
| GbEXPA31 | G-box              | CACGAC        | 584  | 6 +  |
| GbEXPA31 | G-box              | CACGTC        | 1033 | 6 +  |
| GbEXPA31 | G-box              | TACGTG        | 1369 | 6 -  |
| GbEXPA31 | G-box              | CACGAC        | 1434 | 6 -  |
| GbEXPA31 | G-box              | TACGTG        | 1669 | 6 -  |
| GbEXPA31 | TGA-box            | TGACGTAA      | 227  | 8 -  |
| GbEXPA31 | TGA-element        | AACGAC        | 1446 | 6 +  |
| GbEXPA31 | LTR                | CCGAAA        | 316  | 6 +  |
| GbEXPA31 | I-box              | AAGATAAGGC    | 292  | 10 + |
| GbEXPA31 | I-box              | cCATATCCAAT   | 793  | 10 + |
| GbEXPA31 | TGACG-motif        | TGACG         | 230  | 5 -  |
| GbEXPA31 | TGACG-motif        | TGACG         | 1035 | 5 -  |
| GbEXPA31 | TGACG-motif        | TGACG         | 1577 | 5 -  |
| GbEXPA31 | CGTCA-motif        | CGTCA         | 230  | 5 +  |
| GbEXPA31 | CGTCA-motif        | CGTCA         | 1035 | 5 +  |
| GbEXPA31 | CGTCA-motif        | CGTCA         | 1577 | 5 +  |
| GbEXPA31 | RY-element         | CATGCATG      | 337  | 8 +  |
| GbEXPA31 | ACE                | CTAACGTATT    | 129  | 9 -  |
| GbEXPA31 | ACE                | GACACGTATG    | 831  | 9 +  |
| GbEXPA31 | ABRE               | ACGTG         | 1033 | 5 -  |
| GbEXPA31 | ABRE               | ACGTG         | 1369 | 5 -  |
| GbEXPA31 | ABRE               | ACGTG         | 1669 | 5 -  |
| GbEXPA32 | GCN4_motif         | TGAGTCA       | 727  | 7 -  |

|          |                 |            |      |     |
|----------|-----------------|------------|------|-----|
| GbEXPA32 | ABRE            | CGCACGTGTC | 1401 | 9 - |
| GbEXPA32 | ABRE            | CACGTG     | 1403 | 6 - |
| GbEXPA32 | ABRE            | ACGTG      | 1404 | 5 + |
| GbEXPA32 | ABRE            | ACGTG      | 1764 | 5 - |
| GbEXPA32 | CAT-box         | GCCACT     | 276  | 6 + |
| GbEXPA32 | TCT-motif       | TCTTAC     | 357  | 6 - |
| GbEXPA32 | TCT-motif       | TCTTAC     | 1380 | 6 - |
| GbEXPA32 | Box 4           | ATTAAT     | 1237 | 6 - |
| GbEXPA32 | G-Box           | CACGTG     | 1403 | 6 - |
| GbEXPA32 | CGTCA-motif     | CGTCA      | 1582 | 5 + |
| GbEXPA32 | ATCT-motif      | AATCTAATCC | 1388 | 9 - |
| GbEXPA32 | TC-rich repeats | ATTCTCTAAC | 534  | 9 + |
| GbEXPA32 | TGACG-motif     | TGACG      | 1582 | 5 - |
| GbEXPA32 | G-box           | CACGTG     | 1403 | 6 - |
| GbEXPA32 | G-box           | TACGTG     | 1764 | 6 - |
| GbEXPA32 | GATA-motif      | GATAGGA    | 632  | 7 + |
| GbEXLB1  | GATA-motif      | GATAGGA    | 1204 | 7 - |
| GbEXLB1  | G-box           | CACGTC     | 1750 | 6 - |
| GbEXLB1  | chs-CMA2a       | TCACTTGA   | 154  | 8 - |
| GbEXLB1  | TGACG-motif     | TGACG      | 1323 | 5 + |
| GbEXLB1  | TGACG-motif     | TGACG      | 1349 | 5 + |
| GbEXLB1  | TGACG-motif     | TGACG      | 1352 | 5 - |
| GbEXLB1  | TGACG-motif     | TGACG      | 1749 | 5 + |
| GbEXLB1  | TC-rich repeats | GTTTTCTTAC | 144  | 9 + |
| GbEXLB1  | TC-rich repeats | ATTCTCTAAC | 250  | 9 + |
| GbEXLB1  | TC-rich repeats | ATTCTCTAAC | 841  | 9 + |
| GbEXLB1  | TC-rich repeats | ATTCTCTAAC | 917  | 9 + |
| GbEXLB1  | MBS             | CAACTG     | 1556 | 6 - |
| GbEXLB1  | G-Box           | CACGTT     | 1490 | 6 - |
| GbEXLB1  | CGTCA-motif     | CGTCA      | 1323 | 5 - |
| GbEXLB1  | CGTCA-motif     | CGTCA      | 1349 | 5 - |
| GbEXLB1  | CGTCA-motif     | CGTCA      | 1352 | 5 + |
| GbEXLB1  | CGTCA-motif     | CGTCA      | 1749 | 5 - |
| GbEXLB1  | CAT-box         | GCCACT     | 74   | 6 + |
| GbEXLB1  | TCT-motif       | TCTTAC     | 148  | 6 + |
| GbEXLB1  | TCT-motif       | TCTTAC     | 1797 | 6 - |
| GbEXLB1  | Box 4           | ATTAAT     | 1245 | 6 - |
| GbEXLB1  | ABRE            | ACGTG      | 1491 | 5 + |
| GbEXLB1  | ABRE            | ACGTG      | 1751 | 5 + |
| GbEXLB1  | GCN4_motif      | TGAGTCA    | 1314 | 7 + |
| GbEXLA1  | TGACG-motif     | TGACG      | 393  | 5 + |
| GbEXLA1  | TGACG-motif     | TGACG      | 1383 | 5 - |
| GbEXLA1  | TGACG-motif     | TGACG      | 1393 | 5 + |
| GbEXLA1  | G-box           | GCCACGTGGA | 778  | 9 - |
| GbEXLA1  | G-box           | TACGTG     | 780  | 6 + |
| GbEXLA1  | G-box           | TACGTG     | 1535 | 6 - |

|         |                 |              |      |      |
|---------|-----------------|--------------|------|------|
| GbEXLA1 | GT1-motif       | GGTTAA       | 682  | 6 -  |
| GbEXLA1 | GT1-motif       | GGTTAA       | 711  | 6 -  |
| GbEXLA1 | ABRE            | TACGGTC      | 584  | 7 -  |
| GbEXLA1 | ABRE            | ACGTG        | 781  | 5 +  |
| GbEXLA1 | ABRE            | ACGTG        | 1535 | 5 -  |
| GbEXLA1 | GTGGC-motif     | CAGCGTGTGG   | 1748 | 10 + |
| GbEXLA1 | A-box           | CCGTCC       | 964  | 6 +  |
| GbEXLA1 | MRE             | AACCTAA      | 331  | 7 +  |
| GbEXLA1 | MRE             | AACCTAA      | 447  | 7 -  |
| GbEXLA1 | TGA-element     | AACGAC       | 1039 | 6 +  |
| GbEXLA1 | TATC-box        | TATCCCA      | 1462 | 7 -  |
| GbEXLA1 | AuxRR-core      | GGTCCAT      | 581  | 7 -  |
| GbEXLA1 | CGTCA-motif     | CGTCA        | 393  | 5 -  |
| GbEXLA1 | CGTCA-motif     | CGTCA        | 1383 | 5 +  |
| GbEXLA1 | CGTCA-motif     | CGTCA        | 1393 | 5 -  |
| GbEXLA1 | Box 4           | ATTAAT       | 292  | 6 +  |
| GbEXLA1 | Box 4           | ATTAAT       | 982  | 6 +  |
| GbEXLA1 | CAT-box         | GCCACT       | 1055 | 6 +  |
| GbEXLA1 | TCT-motif       | TCTTAC       | 381  | 6 +  |
| GbEXLA1 | TCT-motif       | TCTTAC       | 869  | 6 +  |
| GbEXLA2 | TGACG-motif     | TGACG        | 1778 | 5 -  |
| GbEXLA2 | I-box           | cGATAAGGCG   | 1968 | 9 +  |
| GbEXLA2 | TC-rich repeats | GTTTTCTTAC   | 657  | 9 +  |
| GbEXLA2 | G-box           | TAACACGTAG   | 389  | 9 -  |
| GbEXLA2 | G-box           | TAACACGTAG   | 759  | 9 -  |
| GbEXLA2 | G-box           | TAACACGTAG   | 1122 | 9 +  |
| GbEXLA2 | GT1-motif       | GGTTAAT      | 67   | 7 +  |
| GbEXLA2 | TCA-element     | TCAGAAGAGG   | 838  | 9 -  |
| GbEXLA2 | CGTCA-motif     | CGTCA        | 1778 | 5 +  |
| GbEXLA2 | CAT-box         | GCCACT       | 1275 | 6 -  |
| GbEXLA2 | Box 4           | ATTAAT       | 569  | 6 +  |
| GbEXLA2 | Box 4           | ATTAAT       | 1368 | 6 -  |
| GbEXLA2 | Box 4           | ATTAAT       | 1497 | 6 -  |
| GbEXLB2 | ABRE            | GCAACGTGTC   | 1568 | 9 -  |
| GbEXLB2 | ABRE            | ACGTG        | 1570 | 5 -  |
| GbEXLB2 | ABRE            | ACGTG        | 1741 | 5 +  |
| GbEXLB2 | ABRE            | ACGTG        | 1976 | 5 +  |
| GbEXLB2 | P-box           | CCTTTTG      | 692  | 7 -  |
| GbEXLB2 | G-Box           | CACGTT       | 1570 | 6 +  |
| GbEXLB2 | G-Box           | CACGTT       | 1740 | 6 -  |
| GbEXLB2 | HD-Zip 1        | CAAT(A/T)ATT | 1013 | 8 -  |
| GbEXLB2 | CAT-box         | GCCACT       | 1707 | 6 +  |
| GbEXLB2 | Box 4           | ATTAAT       | 211  | 6 +  |
| GbEXLB2 | Box 4           | ATTAAT       | 215  | 6 +  |
| GbEXLB2 | Box 4           | ATTAAT       | 230  | 6 +  |
| GbEXLB2 | Box 4           | ATTAAT       | 669  | 6 +  |

|          |                 |            |      |     |
|----------|-----------------|------------|------|-----|
| GbEXLB2  | Box 4           | ATTAAT     | 714  | 6 + |
| GbEXLB2  | A-box           | CCGTCC     | 702  | 6 + |
| GbEXLB2  | G-box           | TACGTG     | 1975 | 6 + |
| GbEXLB3  | TGACG-motif     | TGACG      | 1076 | 5 - |
| GbEXLB3  | TC-rich repeats | ATTCTCTAAC | 1246 | 9 - |
| GbEXLB3  | TGA-element     | AACGAC     | 544  | 6 - |
| GbEXLB3  | GCN4_motif      | TGAGTCA    | 664  | 7 - |
| GbEXLB3  | GT1-motif       | GGTTAA     | 85   | 6 - |
| GbEXLB3  | GT1-motif       | GGTTAA     | 201  | 6 - |
| GbEXLB3  | GT1-motif       | GGTTAAT    | 362  | 7 - |
| GbEXLB3  | GT1-motif       | GGTTAA     | 363  | 6 - |
| GbEXLB3  | GT1-motif       | GGTTAAT    | 811  | 7 + |
| GbEXLB3  | GT1-motif       | GGTTAAT    | 997  | 7 + |
| GbEXLB3  | AuxRR-core      | GGTCCAT    | 41   | 7 + |
| GbEXLB3  | ABRE            | ACGTG      | 1576 | 5 - |
| GbEXLB3  | ABRE            | ACGTG      | 1742 | 5 + |
| GbEXLB3  | Box 4           | ATTAAT     | 264  | 6 + |
| GbEXLB3  | CAT-box         | GCCACT     | 1708 | 6 + |
| GbEXLB3  | ATCT-motif      | AATCTAATCC | 392  | 9 - |
| GbEXLB3  | CGTCA-motif     | CGTCA      | 1076 | 5 + |
| GbEXLB3  | G-Box           | CACGTT     | 1741 | 6 - |
| GbEXPA12 | TGA-element     | AACGAC     | 1320 | 6 - |
| GbEXPA12 | G-box           | TACGTG     | 78   | 6 - |
| GbEXPA12 | G-box           | CACGTC     | 1185 | 6 + |
| GbEXPA12 | G-box           | CACGTC     | 1379 | 6 + |
| GbEXPA12 | AE-box          | AGAAACTT   | 1365 | 8 + |
| GbEXPA12 | TGACG-motif     | TGACG      | 1187 | 5 - |
| GbEXPA12 | TGACG-motif     | TGACG      | 1627 | 5 + |
| GbEXPA12 | TGACG-motif     | TGACG      | 1664 | 5 - |
| GbEXPA12 | Box 4           | ATTAAT     | 274  | 6 + |
| GbEXPA12 | Box 4           | ATTAAT     | 587  | 6 + |
| GbEXPA12 | Box 4           | ATTAAT     | 961  | 6 + |
| GbEXPA12 | Box 4           | ATTAAT     | 1988 | 6 - |
| GbEXPA12 | G-Box           | CACGTT     | 444  | 6 + |
| GbEXPA12 | G-Box           | CACGTT     | 1916 | 6 - |
| GbEXPA12 | CGTCA-motif     | CGTCA      | 1187 | 5 + |
| GbEXPA12 | CGTCA-motif     | CGTCA      | 1627 | 5 - |
| GbEXPA12 | CGTCA-motif     | CGTCA      | 1664 | 5 + |
| GbEXPA12 | ABRE            | ACGTG      | 78   | 5 - |
| GbEXPA12 | ABRE            | ACGTG      | 444  | 5 - |
| GbEXPA12 | ABRE            | ACGTG      | 1185 | 5 - |
| GbEXPA12 | ABRE            | ACGTG      | 1379 | 5 - |
| GbEXPA12 | ABRE            | ACGTG      | 1917 | 5 + |
| GbEXPA12 | GT1-motif       | GGTTAA     | 1423 | 6 - |
| GbEXPA13 | TCA-element     | CCATCTTTTT | 221  | 9 + |
| GbEXPA13 | P-box           | CCTTTTG    | 532  | 7 + |

|          |             |            |      |     |
|----------|-------------|------------|------|-----|
| GbEXPA13 | ABRE        | ACGTG      | 1693 | 5 - |
| GbEXPA13 | TCT-motif   | TCTTAC     | 1851 | 6 + |
| GbEXPA13 | Box 4       | ATTAAT     | 215  | 6 + |
| GbEXPA13 | Box 4       | ATTAAT     | 690  | 6 + |
| GbEXPA13 | Box 4       | ATTAAT     | 886  | 6 + |
| GbEXPA13 | Box 4       | ATTAAT     | 1017 | 6 - |
| GbEXPA13 | Box 4       | ATTAAT     | 1915 | 6 - |
| GbEXPA13 | G-Box       | CACGTT     | 1693 | 6 + |
| GbEXPA13 | CGTCA-motif | CGTCA      | 238  | 5 - |
| GbEXPA13 | TGACG-motif | TGACG      | 238  | 5 + |
| GbEXPA13 | TGA-element | AACGAC     | 1948 | 6 + |
| GbEXPA13 | MRE         | AACCTAA    | 1090 | 7 + |
| GbEXPA14 | AuxRR-core  | GGTCCAT    | 1076 | 7 - |
| GbEXPA14 | GT1-motif   | GGTTAA     | 742  | 6 - |
| GbEXPA14 | ACE         | CTAACGTATT | 322  | 9 - |
| GbEXPA14 | ABRE        | ACGTG      | 749  | 5 - |
| GbEXPA14 | ABRE        | ACGTG      | 1416 | 5 + |
| GbEXPA14 | GCN4_motif  | TGAGTCA    | 1325 | 7 - |
| GbEXPA14 | Sp1         | GGGCGG     | 1258 | 6 + |
| GbEXPA14 | P-box       | CCTTTTG    | 649  | 7 + |
| GbEXPA14 | CGTCA-motif | CGTCA      | 1374 | 5 + |
| GbEXPA14 | CGTCA-motif | CGTCA      | 1379 | 5 - |
| GbEXPA14 | CGTCA-motif | CGTCA      | 1405 | 5 - |
| GbEXPA14 | CGTCA-motif | CGTCA      | 1411 | 5 + |
| GbEXPA14 | CGTCA-motif | CGTCA      | 1719 | 5 + |
| GbEXPA14 | G-Box       | CACGTT     | 1415 | 6 - |
| GbEXPA14 | Box 4       | ATTAAT     | 641  | 6 + |
| GbEXPA14 | Box 4       | ATTAAT     | 684  | 6 + |
| GbEXPA14 | Box 4       | ATTAAT     | 987  | 6 + |
| GbEXPA14 | Box 4       | ATTAAT     | 1026 | 6 - |
| GbEXPA14 | Box 4       | ATTAAT     | 1976 | 6 - |
| GbEXPA14 | TGACG-motif | TGACG      | 1374 | 5 - |
| GbEXPA14 | TGACG-motif | TGACG      | 1379 | 5 + |
| GbEXPA14 | TGACG-motif | TGACG      | 1405 | 5 + |
| GbEXPA14 | TGACG-motif | TGACG      | 1411 | 5 - |
| GbEXPA14 | TGACG-motif | TGACG      | 1719 | 5 - |
| GbEXPA14 | G-box       | TACGTG     | 749  | 6 - |
| GbEXPA14 | GATA-motif  | AAGGATAAGC | 958  | 9 - |
| GbEXPA14 | TATC-box    | TATCCCA    | 196  | 7 + |
| GbEXLB4  | TGACG-motif | TGACG      | 404  | 5 - |
| GbEXLB4  | TGACG-motif | TGACG      | 1444 | 5 - |
| GbEXLB4  | GA-motif    | ATAGATAA   | 1348 | 8 + |
| GbEXLB4  | G-box       | TAACACGTAG | 195  | 9 + |
| GbEXLB4  | G-box       | CACGAC     | 617  | 6 - |
| GbEXLB4  | TGA-box     | TGACGTAA   | 401  | 8 - |
| GbEXLB4  | chs-CMA2a   | TCACTTGA   | 704  | 8 + |



|          |             |             |      |      |
|----------|-------------|-------------|------|------|
| GbEXLB4  | CGTCA-motif | CGTCA       | 404  | 5 +  |
| GbEXLB4  | CGTCA-motif | CGTCA       | 1444 | 5 +  |
| GbEXLB4  | TCT-motif   | TCTTAC      | 1024 | 6 +  |
| GbEXLB4  | TCT-motif   | TCTTAC      | 1379 | 6 -  |
| GbEXLB4  | TCT-motif   | TCTTAC      | 1784 | 6 +  |
| GbEXLB4  | CAT-box     | GCCACT      | 1436 | 6 -  |
| GbEXLB4  | CAT-box     | GCCACT      | 1566 | 6 -  |
| GbEXLB4  | Box 4       | ATTAAT      | 965  | 6 +  |
| GbEXLB4  | Box 4       | ATTAAT      | 1676 | 6 -  |
| GbEXLB4  | Box 4       | ATTAAT      | 1709 | 6 -  |
| GbEXLB5  | GT1-motif   | GGTTAA      | 638  | 6 -  |
| GbEXLB5  | ABRE        | ACGTG       | 770  | 5 +  |
| GbEXLB5  | ABRE        | GCAACGTGTC  | 1389 | 9 -  |
| GbEXLB5  | ABRE        | ACGTG       | 1391 | 5 -  |
| GbEXLB5  | ABRE        | GCAACGTGTC  | 1428 | 9 -  |
| GbEXLB5  | ABRE        | ACGTG       | 1430 | 5 -  |
| GbEXLB5  | ABRE        | ACGTG       | 1571 | 5 -  |
| GbEXLB5  | AuxRE       | TGTCTCAATAA | 198  | 11 + |
| GbEXLB5  | TCA-element | CCATCTTTTT  | 618  | 9 -  |
| GbEXLB5  | TCA-element | TCAGAAGAGG  | 1329 | 9 +  |
| GbEXLB5  | CGTCA-motif | CGTCA       | 1180 | 5 +  |
| GbEXLB5  | CGTCA-motif | CGTCA       | 1489 | 5 -  |
| GbEXLB5  | CGTCA-motif | CGTCA       | 1543 | 5 +  |
| GbEXLB5  | CGTCA-motif | CGTCA       | 1803 | 5 +  |
| GbEXLB5  | G-Box       | CACGTT      | 1391 | 6 +  |
| GbEXLB5  | G-Box       | CACGTT      | 1430 | 6 +  |
| GbEXLB5  | TCT-motif   | TCTTAC      | 811  | 6 -  |
| GbEXLB5  | TGACG-motif | TGACG       | 1180 | 5 -  |
| GbEXLB5  | TGACG-motif | TGACG       | 1489 | 5 +  |
| GbEXLB5  | TGACG-motif | TGACG       | 1543 | 5 -  |
| GbEXLB5  | TGACG-motif | TGACG       | 1803 | 5 -  |
| GbEXLB5  | G-box       | TACGTG      | 769  | 6 +  |
| GbEXLB5  | G-box       | TAACACGTAG  | 1427 | 9 +  |
| GbEXLB5  | G-box       | CACGTC      | 1571 | 6 +  |
| GbEXPA15 | Box 4       | ATTAAT      | 160  | 6 +  |
| GbEXPA15 | Box 4       | ATTAAT      | 639  | 6 +  |
| GbEXPA15 | Box 4       | ATTAAT      | 919  | 6 +  |
| GbEXPA15 | Box 4       | ATTAAT      | 1209 | 6 -  |
| GbEXPA15 | Box 4       | ATTAAT      | 1219 | 6 -  |
| GbEXPA15 | Box 4       | ATTAAT      | 1657 | 6 -  |
| GbEXPA15 | G-Box       | CACGTT      | 1733 | 6 +  |
| GbEXPA15 | CGTCA-motif | CGTCA       | 1312 | 5 -  |
| GbEXPA15 | CGTCA-motif | CGTCA       | 1749 | 5 -  |
| GbEXPA15 | TCA-element | CCATCTTTTT  | 266  | 9 +  |
| GbEXPA15 | ABRE        | ACGTG       | 1199 | 5 -  |
| GbEXPA15 | ABRE        | ACGTG       | 1733 | 5 -  |

|          |                    |            |      |      |
|----------|--------------------|------------|------|------|
| GbEXPA15 | GT1-motif          | GGTTAAT    | 664  | 7 +  |
| GbEXPA15 | GT1-motif          | GTGTGTGAA  | 1683 | 9 +  |
| GbEXPA15 | G-box              | TACGTG     | 1199 | 6 -  |
| GbEXPA15 | TGA-element        | AACGAC     | 1479 | 6 +  |
| GbEXPA15 | TC-rich repeats    | GTTTTCTTAC | 346  | 9 +  |
| GbEXPA15 | TGACG-motif        | TGACG      | 1312 | 5 +  |
| GbEXPA15 | TGACG-motif        | TGACG      | 1749 | 5 +  |
| GbEXPA15 | 3-AF1 binding site | TAAGAGAGGA | 615  | 10 - |
| GbEXLA3  | GT1-motif          | GGTTAA     | 350  | 6 +  |
| GbEXLA3  | CGTCA-motif        | CGTCA      | 655  | 5 +  |
| GbEXLA3  | TCCC-motif         | TCTCCCT    | 493  | 7 -  |
| GbEXLA3  | TC-rich repeats    | ATTCTCTAAC | 670  | 9 +  |
| GbEXLA3  | TGACG-motif        | TGACG      | 655  | 5 -  |
| GbEXLA4  | TCT-motif          | TCTTAC     | 1117 | 6 +  |
| GbEXLA4  | CGTCA-motif        | CGTCA      | 890  | 5 -  |
| GbEXLA4  | G-Box              | CACGTG     | 1876 | 6 -  |
| GbEXLA4  | P-box              | CCTTTTG    | 412  | 7 -  |
| GbEXLA4  | GCN4_motif         | TGAGTCA    | 100  | 7 +  |
| GbEXLA4  | GT1-motif          | GGTTAA     | 1415 | 6 -  |
| GbEXLA4  | ABRE               | ACGTG      | 1804 | 5 +  |
| GbEXLA4  | ABRE               | GACACGTGGC | 1874 | 9 -  |
| GbEXLA4  | ABRE               | CACGTG     | 1876 | 6 -  |
| GbEXLA4  | ABRE               | ACGTG      | 1877 | 5 +  |
| GbEXLA4  | GATA-motif         | AAGGATAAGG | 1197 | 9 -  |
| GbEXLA4  | G-box              | CACGTC     | 1803 | 6 -  |
| GbEXLA4  | G-box              | ACACGTGGC  | 1874 | 9 -  |
| GbEXLA4  | G-box              | CACGTG     | 1876 | 6 -  |
| GbEXLA4  | TCCC-motif         | TCTCCCT    | 1981 | 7 +  |
| GbEXLA4  | AE-box             | AGAAACTT   | 710  | 8 -  |
| GbEXLA4  | A-box              | CCGTCC     | 815  | 6 +  |
| GbEXLA4  | TGACG-motif        | TGACG      | 890  | 5 +  |
| GbEXLA4  | I-box              | GTATAAGGCC | 452  | 9 -  |
| GbEXLA5  | TCCC-motif         | TCTCCCT    | 304  | 7 -  |
| GbEXLA5  | GA-motif           | ATAGATAA   | 185  | 8 +  |
| GbEXLA5  | TC-rich repeats    | ATTCTCTAAC | 338  | 9 +  |
| GbEXLA5  | TC-rich repeats    | ATTCTCTAAC | 1020 | 10 + |
| GbEXLA5  | TGA-element        | AACGAC     | 721  | 6 -  |
| GbEXLA5  | Box 4              | ATTAAT     | 1423 | 6 -  |
| GbEXLA5  | TCT-motif          | TCTTAC     | 242  | 6 -  |
| GbEXLA5  | CAT-box            | GCCACT     | 498  | 6 -  |
| GbEXLA5  | MBS                | CAACTG     | 951  | 6 -  |
| GbEXLA5  | CGTCA-motif        | CGTCA      | 212  | 5 +  |
| GbEXLA5  | CGTCA-motif        | CGTCA      | 820  | 5 -  |
| GbEXLA5  | CGTCA-motif        | CGTCA      | 1463 | 5 +  |
| GbEXLA5  | TGACG-motif        | TGACG      | 212  | 5 -  |
| GbEXLA5  | TGACG-motif        | TGACG      | 820  | 5 +  |

|          |              |               |      |       |
|----------|--------------|---------------|------|-------|
| GbEXLA5  | TGACG-motif  | TGACG         | 1463 | 5 -   |
| GbEXLA5  | GATA-motif   | AAGGATAAGC    | 1138 | 9 -   |
| GbEXLA5  | GARE-motif   | TCTGTTG       | 1976 | 7 +   |
| GbEXLA5  | G-box        | CACGTC        | 210  | 6 +   |
| GbEXLA5  | G-box        | CACGTC        | 1461 | 6 +   |
| GbEXLA5  | G-box        | ACACGTGGC     | 1830 | 9 -   |
| GbEXLA5  | G-box        | CACGTG        | 1832 | 6 -   |
| GbEXLA5  | P-box        | CCTTTTG       | 924  | 7 -   |
| GbEXLA5  | P-box        | CCTTTTG       | 991  | 7 +   |
| GbEXLA5  | TCA-element  | CCATCTTTTT    | 1240 | 9 -   |
| GbEXLA5  | TCA-element  | CCATCTTTTT    | 1349 | 9 -   |
| GbEXLA5  | TCA-element  | CCATCTTTTT    | 1962 | 9 -   |
| GbEXLA5  | GT1-motif    | GGTTAA        | 1291 | 6 -   |
| GbEXLA5  | GT1-motif    | GGTTAA        | 1400 | 6 -   |
| GbEXLA5  | ABRE         | ACGTG         | 210  | 5 -   |
| GbEXLA5  | ABRE         | ACGTG         | 1461 | 5 -   |
| GbEXLA5  | ABRE         | GACACGTGGC    | 1830 | 9 -   |
| GbEXLA5  | ABRE         | CACGTG        | 1832 | 6 -   |
| GbEXLA5  | ABRE         | ACGTG         | 1833 | 5 +   |
| GbEXLA5  | HD-Zip 1     | CAAT(A/T)ATTG | 626  | 8.5 + |
| GbEXLA5  | G-Box        | CACGTG        | 1832 | 6 -   |
| GbEXPA16 | Sp1          | GGGCGG        | 1638 | 6 -   |
| GbEXPA16 | GCN4_motif   | TGAGTCA       | 870  | 7 -   |
| GbEXPA16 | LAMP-element | CTTTATCA      | 28   | 8 +   |
| GbEXPA16 | ABRE         | ACGTG         | 690  | 5 +   |
| GbEXPA16 | GT1-motif    | GGTTAAT       | 378  | 7 +   |
| GbEXPA16 | GT1-motif    | GTGTGTGAA     | 692  | 9 +   |
| GbEXPA16 | GT1-motif    | GGTTAA        | 1017 | 6 +   |
| GbEXPA16 | TCT-motif    | TCTTAC        | 849  | 6 +   |
| GbEXPA16 | CAT-box      | GCCACT        | 1464 | 6 -   |
| GbEXPA16 | CAT-box      | GCCACT        | 1535 | 6 -   |
| GbEXPA16 | CAT-box      | GCCACT        | 1607 | 6 -   |
| GbEXPA16 | Box 4        | ATTAAT        | 1268 | 6 -   |
| GbEXPA16 | CGTCA-motif  | CGTCA         | 1496 | 5 +   |
| GbEXPA16 | TGACG-motif  | TGACG         | 1496 | 5 -   |
| GbEXPA16 | TGA-element  | AACGAC        | 466  | 6 +   |
| GbEXPA16 | GATA-motif   | AAGGATAAGC    | 737  | 9 -   |
| GbEXPA16 | GATA-motif   | GATAGGA       | 1030 | 7 -   |
| GbEXPA16 | MRE          | AACCTAA       | 344  | 7 +   |
| GbEXPA16 | G-box        | CACGTC        | 689  | 6 -   |
| GbEXPA17 | G-box        | TACGTG        | 1525 | 6 -   |
| GbEXPA17 | ATC-motif    | AGTAATCT      | 1614 | 8 +   |
| GbEXPA17 | ATC-motif    | AGTAATCT      | 1772 | 8 -   |
| GbEXPA17 | TGACG-motif  | TGACG         | 781  | 5 +   |
| GbEXPA17 | TGACG-motif  | TGACG         | 1224 | 5 -   |
| GbEXPA17 | CGTCA-motif  | CGTCA         | 781  | 5 -   |

|          |             |            |      |      |
|----------|-------------|------------|------|------|
| GbEXPA17 | CGTCA-motif | CGTCA      | 1224 | 5 +  |
| GbEXPA17 | CAT-box     | GCCACT     | 517  | 6 -  |
| GbEXPA17 | CAT-box     | GCCACT     | 521  | 6 +  |
| GbEXPA17 | CAT-box     | GCCACT     | 1415 | 6 +  |
| GbEXPA17 | Box 4       | ATTAAT     | 103  | 6 +  |
| GbEXPA17 | Box 4       | ATTAAT     | 1286 | 6 -  |
| GbEXPA17 | ABRE        | CGTACGTGCA | 1523 | 10 - |
| GbEXPA17 | ABRE        | ACGTG      | 1525 | 5 -  |
| GbEXPA17 | GT1-motif   | GGTTAAT    | 1051 | 7 -  |
| GbEXPA17 | GT1-motif   | GGTTAA     | 1052 | 6 -  |
| GbEXPA17 | GT1-motif   | GGTTAAT    | 1192 | 7 -  |
| GbEXPA17 | GT1-motif   | GGTTAA     | 1193 | 6 -  |
| GbEXPA18 | Box 4       | ATTAAT     | 1440 | 6 -  |
| GbEXPA18 | Box 4       | ATTAAT     | 1837 | 6 -  |
| GbEXPA18 | TCT-motif   | TCTTAC     | 203  | 6 +  |
| GbEXPA18 | CGTCA-motif | CGTCA      | 1959 | 5 +  |
| GbEXPA18 | Sp1         | GGGCGG     | 85   | 6 +  |
| GbEXPA18 | ACE         | GACACGTATG | 1218 | 9 -  |
| GbEXPA18 | MRE         | AACCTAA    | 1128 | 7 +  |
| GbEXPA18 | ATC-motif   | AGTAATCT   | 1371 | 8 -  |
| GbEXPB2  | ACE         | GACACGTATG | 793  | 9 -  |
| GbEXPB2  | TATC-box    | TATCCCA    | 466  | 7 +  |
| GbEXPB2  | MRE         | AACCTAA    | 343  | 7 -  |
| GbEXPB2  | G-Box       | CACGTT     | 1023 | 6 +  |
| GbEXPB2  | GCN4_motif  | TGAGTCA    | 349  | 7 +  |
| GbEXPB2  | AACA_motif  | TAACAAACTC | 34   | 11 - |
| GbEXPB2  | AACA_motif  | TAACAAACTC | 970  | 11 + |
| GbEXPB2  | P-box       | CCTTTTG    | 109  | 7 -  |
| GbEXPB2  | ABRE        | ACGTG      | 1023 | 5 -  |
| GbEXPB2  | GT1-motif   | GGTTAA     | 453  | 6 -  |
| GbEXPB2  | GT1-motif   | GGTTAA     | 765  | 6 -  |
| GbEXPB2  | GT1-motif   | GGTTAA     | 1541 | 6 -  |
| GbEXPB2  | G-box       | CACGAC     | 1532 | 6 +  |
| GbEXPB2  | TGACG-motif | TGACG      | 324  | 5 +  |
| GbEXPB2  | TGACG-motif | TGACG      | 714  | 5 -  |
| GbEXPB3  | G-Box       | CACGTG     | 602  | 6 +  |
| GbEXPB3  | G-Box       | CACGTT     | 1419 | 6 +  |
| GbEXPB3  | CGTCA-motif | CGTCA      | 1730 | 5 -  |
| GbEXPB3  | ATCT-motif  | AATCTAATCC | 533  | 9 +  |
| GbEXPB3  | Box 4       | ATTAAT     | 460  | 6 +  |
| GbEXPB3  | RY-element  | CATGCATG   | 971  | 8 +  |
| GbEXPB3  | ABRE        | CACGTG     | 602  | 6 +  |
| GbEXPB3  | ABRE        | ACGTG      | 603  | 5 +  |
| GbEXPB3  | ABRE        | ACGTG      | 915  | 5 -  |
| GbEXPB3  | ABRE        | ACGTG      | 1419 | 5 -  |
| GbEXPB3  | GT1-motif   | GGTTAAT    | 1293 | 7 -  |

|         |                    |            |      |      |
|---------|--------------------|------------|------|------|
| GbEXPB3 | GT1-motif          | GGTTAA     | 1294 | 6 -  |
| GbEXPB3 | TCA-element        | CCATCTTTTT | 755  | 9 -  |
| GbEXPB3 | Sp1                | GGGCGG     | 764  | 6 +  |
| GbEXPB3 | G-box              | CACGTG     | 602  | 6 +  |
| GbEXPB3 | G-box              | TACGTG     | 915  | 6 -  |
| GbEXPB3 | TGA-element        | AACGAC     | 1677 | 6 +  |
| GbEXPB3 | TGA-element        | AACGAC     | 1816 | 6 +  |
| GbEXPB3 | TGACG-motif        | TGACG      | 1730 | 5 +  |
| GbEXPB3 | 3-AF1 binding site | TAAGAGAGGA | 726  | 10 - |
| GbEXPB4 | TATC-box           | TATCCCA    | 1882 | 7 +  |
| GbEXPB4 | TGA-element        | AACGAC     | 1188 | 6 +  |
| GbEXPB4 | G-box              | CACGTC     | 1750 | 6 +  |
| GbEXPB4 | A-box              | CCGTCC     | 748  | 6 -  |
| GbEXPB4 | A-box              | CCGTCC     | 771  | 6 +  |
| GbEXPB4 | TGACG-motif        | TGACG      | 371  | 5 -  |
| GbEXPB4 | TGACG-motif        | TGACG      | 1752 | 5 -  |
| GbEXPB4 | I-box              | GTATAAGGCC | 1760 | 9 +  |
| GbEXPB4 | TCT-motif          | TCTTAC     | 542  | 6 +  |
| GbEXPB4 | CGTCA-motif        | CGTCA      | 371  | 5 +  |
| GbEXPB4 | CGTCA-motif        | CGTCA      | 1752 | 5 +  |
| GbEXPB4 | TCA-element        | CCATCTTTTT | 161  | 9 +  |
| GbEXPB4 | TCA-element        | TCAGAAGAGG | 851  | 9 -  |
| GbEXPB4 | TCA-element        | TCAGAAGAGG | 1677 | 10 - |
| GbEXPB4 | ACE                | CTAACGTATT | 363  | 9 -  |
| GbEXPB4 | ABRE               | ACGTG      | 1750 | 5 -  |
| GbEXPB4 | AuxRR-core         | GGTCCAT    | 1670 | 7 -  |
| GbEXPB4 | GT1-motif          | GGTTAA     | 109  | 6 -  |

|                      |                                                                     |
|----------------------|---------------------------------------------------------------------|
| Petroselinum crispum | part of a conserved DNA module involved in light responsiveness     |
| Zea mays             | cis-acting regulatory element essential for the anaerobic induction |
| Zea mays             | cis-acting regulatory element essential for the anaerobic induction |
| Arabidopsis thaliana | part of a light responsive element                                  |
| Hordeum vulgare      | cis-acting regulatory element involved in the MeJA-responsiveness   |
| Oryza sativa         | cis-regulatory element involved in endosperm expression             |
| Oryza sativa         | gibberellin-responsive element                                      |
| Oryza sativa         | gibberellin-responsive element                                      |
| Arabidopsis thaliana | light responsive element                                            |
| Arabidopsis thaliana | light responsive element                                            |
| Arabidopsis thaliana | light responsive element                                            |
| Nicotiana tabacum    | cis-acting regulatory element involved in auxin responsiveness      |
| Arabidopsis thaliana | cis-acting element involved in the abscisic acid responsiveness     |
| Arabidopsis thaliana | cis-acting regulatory element involved in light responsiveness      |
| Solanum tuberosum    | part of a light responsive element                                  |
| Petroselinum crispum | MYB binding site involved in light responsiveness                   |
| Pisum sativum        | common cis-acting element in promoter and enhancer regions          |
| Nicotiana tabacum    | cis-acting element involved in defense and stress responsiveness    |
| Hordeum vulgare      | cis-acting regulatory element involved in the MeJA-responsiveness   |
| Petroselinum crispum | cis-acting element involved in light responsiveness                 |
| Petroselinum crispum | cis-acting element involved in light responsiveness                 |
| Arabidopsis thaliana | cis-acting element involved in the abscisic acid responsiveness     |
| Arabidopsis thaliana | cis-acting element involved in the abscisic acid responsiveness     |
| Arabidopsis thaliana | cis-acting element involved in the abscisic acid responsiveness     |
| Arabidopsis thaliana | cis-acting element involved in the abscisic acid responsiveness     |
| Oryza sativa         | gibberellin-responsive element                                      |
| Pisum sativum        | part of a conserved DNA module involved in light responsiveness     |
| Pisum sativum        | cis-acting regulatory element involved in light responsiveness      |
| Pisum sativum        | cis-acting regulatory element involved in light responsiveness      |
| Hordeum vulgare      | cis-acting regulatory element involved in the MeJA-responsiveness   |
| Arabidopsis thaliana | part of a light responsive element                                  |
| Arabidopsis thaliana | part of a light responsive element                                  |
| Helianthus annuus    | cis-acting regulatory element involved in seed-specific regulation  |
| Petroselinum crispum | part of a conserved DNA module involved in light responsiveness     |
| Petroselinum crispum | part of a conserved DNA module involved in light responsiveness     |
| Arabidopsis thaliana | element involved in differentiation of the palisade mesophyll cells |
| Arabidopsis thaliana | part of a light responsive element                                  |
| Solanum tuberosum    | part of a light responsive element                                  |
| Hordeum vulgare      | cis-acting regulatory element involved in the MeJA-responsiveness   |
| Flaveria trinervia   | part of a light responsive element                                  |
| Nicotiana tabacum    | cis-acting element involved in defense and stress responsiveness    |
| Nicotiana tabacum    | cis-acting element involved in defense and stress responsiveness    |
| Arabidopsis thaliana | part of a module for light response                                 |
| Petroselinum crispum | cis-acting regulatory element                                       |
| Petroselinum crispum | MYB binding site involved in light responsiveness                   |
| Petroselinum crispum | MYB binding site involved in light responsiveness                   |

|                      |                                                                  |
|----------------------|------------------------------------------------------------------|
| Arabidopsis thaliana | cis-acting regulatory element involved in light responsiveness   |
| Arabidopsis thaliana | cis-acting regulatory element involved in light responsiveness   |
| Arabidopsis thaliana | cis-acting regulatory element involved in light responsiveness   |
| Hordeum vulgare      | cis-acting element involved in low-temperature responsiveness    |
| Brassica oleracea    | gibberellin-responsive element                                   |
| Glycine max          | binding site of AT-rich DNA binding protein (ATBP-1)             |
| Brassica oleracea    | cis-acting regulatory element involved in light responsiveness   |
| Zea mays             | cis-acting regulatory element involved in light responsiveness   |
| Zea mays             | cis-acting regulatory element involved in light responsiveness   |
| Nicotiana tabacum    | cis-acting element involved in defense and stress responsiveness |
| Petroselinum crispum | part of a conserved DNA module involved in light responsiveness  |
| Petroselinum crispum | part of a conserved DNA module involved in light responsiveness  |
| Petroselinum crispum | part of a conserved DNA module involved in light responsiveness  |
| Petroselinum crispum | part of a conserved DNA module involved in light responsiveness  |
| Pisum sativum        | cis-acting regulatory element involved in light responsiveness   |
| Pisum sativum        | cis-acting regulatory element involved in light responsiveness   |
| Brassica oleracea    | cis-acting element involved in salicylic acid responsiveness     |
| Oryza sativa         | cis-regulatory element involved in endosperm expression          |
| Arabidopsis thaliana | cis-acting element involved in the abscisic acid responsiveness  |
| Arabidopsis thaliana | cis-acting element involved in the abscisic acid responsiveness  |
| Arabidopsis thaliana | cis-acting element involved in the abscisic acid responsiveness  |
| Hordeum vulgare      | cis-acting element involved in the abscisic acid responsiveness  |
| Nicotiana tabacum    | cis-acting regulatory element involved in auxin responsiveness   |
| Nicotiana tabacum    | cis-acting regulatory element involved in auxin responsiveness   |
| Petroselinum crispum | part of a conserved DNA module involved in light responsiveness  |
| Petroselinum crispum | part of a conserved DNA module involved in light responsiveness  |
| Petroselinum crispum | part of a conserved DNA module involved in light responsiveness  |
| Petroselinum crispum | part of a conserved DNA module involved in light responsiveness  |
| Pisum sativum        | cis-acting regulatory element involved in light responsiveness   |
| Pisum sativum        | cis-acting regulatory element involved in light responsiveness   |
| Oryza sativa         | cis-regulatory element involved in endosperm expression          |
| Brassica oleracea    | cis-acting element involved in salicylic acid responsiveness     |
| Nicotiana tabacum    | cis-acting regulatory element involved in auxin responsiveness   |
| Nicotiana tabacum    | cis-acting regulatory element involved in auxin responsiveness   |
| Arabidopsis thaliana | cis-acting element involved in the abscisic acid responsiveness  |
| Arabidopsis thaliana | cis-acting element involved in the abscisic acid responsiveness  |
| Arabidopsis thaliana | cis-acting element involved in the abscisic acid responsiveness  |
| Hordeum vulgare      | cis-acting element involved in the abscisic acid responsiveness  |
| Glycine max          | binding site of AT-rich DNA binding protein (ATBP-1)             |
| Brassica oleracea    | gibberellin-responsive element                                   |
| Brassica oleracea    | cis-acting regulatory element involved in light responsiveness   |
| Zea mays             | cis-acting regulatory element involved in light responsiveness   |
| Zea mays             | cis-acting regulatory element involved in light responsiveness   |
| Petroselinum crispum | cis-acting regulatory element                                    |
| Arabidopsis thaliana | part of a module for light response                              |
| Petroselinum crispum | cis-acting regulatory element                                    |

|                      |                                                                     |
|----------------------|---------------------------------------------------------------------|
| Hordeum vulgare      | cis-acting regulatory element involved in the MeJA-responsiveness   |
| Hordeum vulgare      | cis-acting regulatory element involved in the MeJA-responsiveness   |
| Hordeum vulgare      | cis-acting regulatory element involved in the MeJA-responsiveness   |
| Arabidopsis thaliana | cis-acting regulatory element involved in light responsiveness      |
| Daucus carota        | part of a light responsive element                                  |
| Petroselinum crispum | MYB binding site involved in light responsiveness                   |
| Nicotiana tabacum    | cis-acting element involved in salicylic acid responsiveness        |
| Arabidopsis thaliana | cis-acting element involved in the abscisic acid responsiveness     |
| Nicotiana tabacum    | cis-acting regulatory element involved in auxin responsiveness      |
| Arabidopsis thaliana | part of a light responsive element                                  |
| Solanum tuberosum    | part of a light responsive module                                   |
| Zea mays             | cis-acting regulatory element essential for the anaerobic induction |
| Zea mays             | cis-acting regulatory element essential for the anaerobic induction |
| Zea mays             | cis-acting regulatory element essential for the anaerobic induction |
| Petroselinum crispum | part of a conserved DNA module involved in light responsiveness     |
| Hordeum vulgare      | cis-acting regulatory element involved in the MeJA-responsiveness   |
| Hordeum vulgare      | cis-acting regulatory element involved in the MeJA-responsiveness   |
| Hordeum vulgare      | cis-acting regulatory element involved in the MeJA-responsiveness   |
| Arabidopsis thaliana | MYB binding site involved in drought-inducibility                   |
| Glycine max          | binding site of AT-rich DNA binding protein (ATBP-1)                |
| Zea mays             | cis-acting regulatory element involved in light responsiveness      |
| Hordeum vulgare      | cis-acting regulatory element involved in the MeJA-responsiveness   |
| Hordeum vulgare      | cis-acting regulatory element involved in the MeJA-responsiveness   |
| Hordeum vulgare      | cis-acting regulatory element involved in the MeJA-responsiveness   |
| Spinacia oleracea    | part of a light responsive element                                  |
| Arabidopsis thaliana | MYB binding site involved in drought-inducibility                   |
| Arabidopsis thaliana | MYB binding site involved in drought-inducibility                   |
| Arabidopsis thaliana | MYB binding site involved in drought-inducibility                   |
| Pisum sativum        | cis-acting regulatory element involved in light responsiveness      |
| Hordeum vulgare      | cis-acting regulatory element involved in the MeJA-responsiveness   |
| Hordeum vulgare      | cis-acting regulatory element involved in the MeJA-responsiveness   |
| Hordeum vulgare      | cis-acting regulatory element involved in the MeJA-responsiveness   |
| Petroselinum crispum | part of a conserved DNA module involved in light responsiveness     |
| Petroselinum crispum | part of a conserved DNA module involved in light responsiveness     |
| Petroselinum crispum | part of a conserved DNA module involved in light responsiveness     |
| Petroselinum crispum | part of a conserved DNA module involved in light responsiveness     |
| Arabidopsis thaliana | element involved in differentiation of the palisade mesophyll cells |
| Arabidopsis thaliana | cis-acting element involved in the abscisic acid responsiveness     |
| Arabidopsis thaliana | cis-acting element involved in the abscisic acid responsiveness     |
| Oryza sativa         | gibberellin-responsive element                                      |
| Petroselinum crispum | part of a conserved DNA module involved in light responsiveness     |
| Petroselinum crispum | part of a conserved DNA module involved in light responsiveness     |
| Petroselinum crispum | part of a conserved DNA module involved in light responsiveness     |
| Petroselinum crispum | part of a conserved DNA module involved in light responsiveness     |
| Pisum sativum        | cis-acting regulatory element involved in light responsiveness      |
| Pisum sativum        | cis-acting regulatory element involved in light responsiveness      |



|                      |                                                                       |
|----------------------|-----------------------------------------------------------------------|
| Arabidopsis thaliana | MYB binding site involved in drought-inducibility                     |
| Oryza sativa         | cis-regulatory element involved in endosperm expression               |
| Brassica oleracea    | cis-acting element involved in salicylic acid responsiveness          |
| Nicotiana tabacum    | cis-acting regulatory element involved in auxin responsiveness        |
| Nicotiana tabacum    | cis-acting regulatory element involved in auxin responsiveness        |
| Arabidopsis thaliana | cis-acting element involved in the abscisic acid responsiveness       |
| Arabidopsis thaliana | cis-acting element involved in the abscisic acid responsiveness       |
| Arabidopsis thaliana | cis-acting element involved in the abscisic acid responsiveness       |
| Hordeum vulgare      | cis-acting element involved in the abscisic acid responsiveness       |
| Brassica oleracea    | cis-acting regulatory element involved in light responsiveness        |
| Zea mays             | cis-acting regulatory element involved in light responsiveness        |
| Zea mays             | cis-acting regulatory element involved in light responsiveness        |
| Brassica oleracea    | gibberellin-responsive element                                        |
| Hordeum vulgare      | cis-acting regulatory element involved in the MeJA-responsiveness     |
| Arabidopsis thaliana | cis-acting regulatory element involved in light responsiveness        |
| Solanum tuberosum    | part of a light responsive element                                    |
| Solanum tuberosum    | part of a light responsive element                                    |
| Brassica oleracea    | gibberellin-responsive element                                        |
| Hordeum vulgare      | cis-acting element involved in low-temperature responsiveness         |
| Solanum tuberosum    | light responsive element                                              |
| Arabidopsis thaliana | light responsive element                                              |
| Hordeum vulgare      | cis-acting element involved in the abscisic acid responsiveness       |
| Arabidopsis thaliana | cis-acting element involved in the abscisic acid responsiveness       |
| Arabidopsis thaliana | cis-acting element involved in the abscisic acid responsiveness       |
| Hordeum vulgare      | cis-acting regulatory element involved in the MeJA-responsiveness     |
| Pisum sativum        | cis-acting regulatory element involved in light responsiveness        |
| Arabidopsis thaliana | MYB binding site involved in drought-inducibility                     |
| Arabidopsis thaliana | MYB binding site involved in drought-inducibility                     |
| Zea mays             | cis-acting regulatory element involved in zein metabolism regulation  |
| Arabidopsis thaliana | part of a light responsive element                                    |
| Petroselinum crispum | part of a conserved DNA module involved in light responsiveness       |
| Petroselinum crispum | part of a conserved DNA module involved in light responsiveness       |
| Petroselinum crispum | part of a conserved DNA module involved in light responsiveness       |
| Petroselinum crispum | part of a conserved DNA module involved in light responsiveness       |
| Petroselinum crispum | part of a conserved DNA module involved in light responsiveness       |
| Petroselinum crispum | gibberellin-responsive element and part of a light responsive element |
| Oryza sativa         | involved in endosperm-specific negative expression                    |
| Oryza sativa         | cis-regulatory element involved in endosperm expression               |
| Nicotiana tabacum    | cis-acting regulatory element involved in auxin responsiveness        |
| Nicotiana tabacum    | cis-acting regulatory element involved in auxin responsiveness        |
| Avena sativa         | light responsive element                                              |
| Arabidopsis thaliana | light responsive element                                              |
| Arabidopsis thaliana | cis-acting element involved in the abscisic acid responsiveness       |
| Petroselinum crispum | part of a conserved DNA module involved in light responsiveness       |
| Arabidopsis thaliana | cis-acting regulatory element related to meristem expression          |
| Hordeum vulgare      | cis-acting regulatory element involved in the MeJA-responsiveness     |

|                      |                                                                      |
|----------------------|----------------------------------------------------------------------|
| Hordeum vulgare      | cis-acting regulatory element involved in the MeJA-responsiveness    |
| Hordeum vulgare      | cis-acting regulatory element involved in the MeJA-responsiveness    |
| Hordeum vulgare      | cis-acting regulatory element involved in the MeJA-responsiveness    |
| Hordeum vulgare      | cis-acting regulatory element involved in the MeJA-responsiveness    |
| Hordeum vulgare      | cis-acting regulatory element involved in the MeJA-responsiveness    |
| Nicotiana tabacum    | cis-acting element involved in defense and stress responsiveness     |
| Brassica oleracea    | auxin-responsive element                                             |
| Zea mays             | cis-acting regulatory element involved in light responsiveness       |
| Zea mays             | cis-acting regulatory element involved in light responsiveness       |
| Zea mays             | cis-acting regulatory element involved in light responsiveness       |
| Hordeum vulgare      | cis-acting regulatory element involved in the MeJA-responsiveness    |
| Hordeum vulgare      | cis-acting regulatory element involved in the MeJA-responsiveness    |
| Hordeum vulgare      | cis-acting regulatory element involved in the MeJA-responsiveness    |
| Brassica oleracea    | auxin-responsive element                                             |
| Brassica oleracea    | gibberellin-responsive element                                       |
| Arabidopsis thaliana | cis-acting regulatory element involved in light responsiveness       |
| Arabidopsis thaliana | cis-acting regulatory element involved in light responsiveness       |
| Oryza sativa         | gibberellin-responsive element                                       |
| Petroselinum crispum | cis-acting element involved in light responsiveness                  |
| Arabidopsis thaliana | cis-acting element involved in the abscisic acid responsiveness      |
| Arabidopsis thaliana | cis-acting element involved in the abscisic acid responsiveness      |
| Oryza sativa         | cis-acting element involved in the abscisic acid responsiveness      |
| Oryza sativa         | cis-acting element involved in the abscisic acid responsiveness      |
| Arabidopsis thaliana | cis-acting element involved in the abscisic acid responsiveness      |
| Arabidopsis thaliana | cis-acting element involved in the abscisic acid responsiveness      |
| Arabidopsis thaliana | cis-acting element involved in the abscisic acid responsiveness      |
| Petroselinum crispum | part of a conserved DNA module involved in light responsiveness      |
| Petroselinum crispum | part of a conserved DNA module involved in light responsiveness      |
| Petroselinum crispum | part of a conserved DNA module involved in light responsiveness      |
| Petroselinum crispum | part of a conserved DNA module involved in light responsiveness      |
| Arabidopsis thaliana | cis-acting regulatory element related to meristem expression         |
| Arabidopsis thaliana | part of a light responsive element                                   |
| Arabidopsis thaliana | part of a light responsive element                                   |
| Zea mays             | cis-acting regulatory element essential for the anaerobic induction  |
| Zea mays             | cis-acting regulatory element involved in zein metabolism regulation |
| Pisum sativum        | part of a conserved DNA module involved in light responsiveness      |
| Pisum sativum        | part of a conserved DNA module involved in light responsiveness      |
| Hordeum vulgare      | cis-acting regulatory element involved in the MeJA-responsiveness    |
| Hordeum vulgare      | cis-acting regulatory element involved in the MeJA-responsiveness    |
| Hordeum vulgare      | cis-acting regulatory element involved in the MeJA-responsiveness    |
| Pisum sativum        | cis-acting regulatory element involved in light responsiveness       |
| Pisum sativum        | cis-acting regulatory element involved in light responsiveness       |
| Pisum sativum        | cis-acting regulatory element involved in light responsiveness       |
| Arabidopsis thaliana | cis-acting regulatory element involved in light responsiveness       |
| Arabidopsis thaliana | cis-acting regulatory element involved in light responsiveness       |
| Brassica oleracea    | cis-acting regulatory element involved in light responsiveness       |

|                             |                                                                      |
|-----------------------------|----------------------------------------------------------------------|
| <i>Zea mays</i>             | cis-acting regulatory element involved in light responsiveness       |
| <i>Larix laricina</i>       | part of a light responsive element                                   |
| <i>Solanum tuberosum</i>    | part of a light responsive element                                   |
| <i>Hordeum vulgare</i>      | cis-acting regulatory element involved in the MeJA-responsiveness    |
| <i>Hordeum vulgare</i>      | cis-acting regulatory element involved in the MeJA-responsiveness    |
| <i>Hordeum vulgare</i>      | cis-acting regulatory element involved in the MeJA-responsiveness    |
| <i>Petroselinum crispum</i> | part of a conserved DNA module involved in light responsiveness      |
| <i>Petroselinum crispum</i> | part of a conserved DNA module involved in light responsiveness      |
| <i>Zea mays</i>             | cis-acting regulatory element essential for the anaerobic induction  |
| <i>Zea mays</i>             | cis-acting regulatory element essential for the anaerobic induction  |
| <i>Zea mays</i>             | cis-acting regulatory element essential for the anaerobic induction  |
| <i>Hordeum vulgare</i>      | cis-acting regulatory element involved in the MeJA-responsiveness    |
| <i>Hordeum vulgare</i>      | cis-acting regulatory element involved in the MeJA-responsiveness    |
| <i>Hordeum vulgare</i>      | cis-acting regulatory element involved in the MeJA-responsiveness    |
| <i>Pisum sativum</i>        | cis-acting regulatory element involved in light responsiveness       |
| <i>Pisum sativum</i>        | cis-acting regulatory element involved in light responsiveness       |
| <i>Arabidopsis thaliana</i> | light responsive element                                             |
| <i>Arabidopsis thaliana</i> | cis-acting element involved in the abscisic acid responsiveness      |
| <i>Triticum aestivum</i>    | cis-acting element involved in the abscisic acid responsiveness      |
| <i>Arabidopsis thaliana</i> | cis-acting element involved in the abscisic acid responsiveness      |
| <i>Arabidopsis thaliana</i> | cis-acting element involved in the abscisic acid responsiveness      |
| <i>Arabidopsis thaliana</i> | cis-acting element involved in the abscisic acid responsiveness      |
| <i>Arabidopsis thaliana</i> | cis-acting element involved in the abscisic acid responsiveness      |
| <i>Zea mays</i>             | cis-acting regulatory element involved in zein metabolism regulation |
| <i>Zea mays</i>             | cis-acting regulatory element involved in zein metabolism regulation |
| <i>Zea mays</i>             | cis-acting regulatory element involved in zein metabolism regulation |
| <i>Arabidopsis thaliana</i> | cis-acting regulatory element related to meristem expression         |
| <i>Helianthus annuus</i>    | cis-acting regulatory element involved in seed-specific regulation   |
| <i>Petroselinum crispum</i> | part of a conserved DNA module involved in light responsiveness      |
| <i>Petroselinum crispum</i> | part of a conserved DNA module involved in light responsiveness      |
| <i>Petroselinum crispum</i> | part of a conserved DNA module involved in light responsiveness      |
| <i>Pisum sativum</i>        | cis-acting regulatory element involved in light responsiveness       |
| <i>Pisum sativum</i>        | cis-acting regulatory element involved in light responsiveness       |
| <i>Hordeum vulgare</i>      | cis-acting regulatory element involved in the MeJA-responsiveness    |
| <i>Hordeum vulgare</i>      | cis-acting regulatory element involved in the MeJA-responsiveness    |
| <i>Hordeum vulgare</i>      | cis-acting regulatory element involved in the MeJA-responsiveness    |
| <i>Arabidopsis thaliana</i> | MYB binding site involved in drought-inducibility                    |
| <i>Arabidopsis thaliana</i> | MYB binding site involved in drought-inducibility                    |
| <i>Arabidopsis thaliana</i> | MYB binding site involved in drought-inducibility                    |
| <i>Arabidopsis thaliana</i> | MYB binding site involved in drought-inducibility                    |
| <i>Arabidopsis thaliana</i> | cis-acting element involved in the abscisic acid responsiveness      |
| <i>Arabidopsis thaliana</i> | cis-acting element involved in the abscisic acid responsiveness      |
| <i>Arabidopsis thaliana</i> | cis-acting element involved in the abscisic acid responsiveness      |
| <i>Arabidopsis thaliana</i> | light responsive element                                             |
| <i>Arabidopsis thaliana</i> | light responsive element                                             |
| <i>Arabidopsis thaliana</i> | light responsive element                                             |

|                             |                                                                      |
|-----------------------------|----------------------------------------------------------------------|
| <i>Arabidopsis thaliana</i> | light responsive element                                             |
| <i>Hordeum vulgare</i>      | cis-acting element involved in low-temperature responsiveness        |
| <i>Zea mays</i>             | enhancer-like element involved in anoxic specific inducibility       |
| <i>Zea mays</i>             | enhancer-like element involved in anoxic specific inducibility       |
| <i>Arabidopsis thaliana</i> | cis-acting regulatory element involved in light responsiveness       |
| <i>Arabidopsis thaliana</i> | cis-acting regulatory element involved in light responsiveness       |
| <i>Brassica oleracea</i>    | auxin-responsive element                                             |
| <i>Brassica oleracea</i>    | auxin-responsive element                                             |
| <i>Solanum tuberosum</i>    | part of a light responsive element                                   |
| <i>Petroselinum crispum</i> | cis-acting regulatory element                                        |
| <i>Zea mays</i>             | part of a light responsive element                                   |
| <i>Nicotiana tabacum</i>    | cis-acting element involved in defense and stress responsiveness     |
| <i>Nicotiana tabacum</i>    | cis-acting element involved in defense and stress responsiveness     |
| <i>Hordeum vulgare</i>      | cis-acting regulatory element involved in the MeJA-responsiveness    |
| <i>Hordeum vulgare</i>      | cis-acting regulatory element involved in the MeJA-responsiveness    |
| <i>Hordeum vulgare</i>      | cis-acting regulatory element involved in the MeJA-responsiveness    |
| <i>Arabidopsis thaliana</i> | part of a conserved DNA module involved in light responsiveness      |
| <i>Arabidopsis thaliana</i> | part of a light response element                                     |
| <i>Daucus carota</i>        | part of a light responsive element                                   |
| <i>Zea mays</i>             | cis-acting regulatory element involved in light responsiveness       |
| <i>Arabidopsis thaliana</i> | cis-acting regulatory element involved in light responsiveness       |
| <i>Solanum tuberosum</i>    | part of a light responsive element                                   |
| <i>Brassica oleracea</i>    | auxin-responsive element                                             |
| <i>Nicotiana tabacum</i>    | cis-acting element involved in salicylic acid responsiveness         |
| <i>Oryza sativa</i>         | gibberellin-responsive element                                       |
| <i>Arabidopsis thaliana</i> | light responsive element                                             |
| <i>Arabidopsis thaliana</i> | cis-acting element involved in the abscisic acid responsiveness      |
| <i>Arabidopsis thaliana</i> | cis-acting element involved in the abscisic acid responsiveness      |
| <i>Arabidopsis thaliana</i> | cis-acting element involved in the abscisic acid responsiveness      |
| <i>Zea mays</i>             | cis-acting regulatory element involved in zein metabolism regulation |
| <i>Petroselinum crispum</i> | part of a conserved DNA module involved in light responsiveness      |
| <i>Petroselinum crispum</i> | part of a conserved DNA module involved in light responsiveness      |
| <i>Arabidopsis thaliana</i> | cis-acting regulatory element related to meristem expression         |
| <i>Arabidopsis thaliana</i> | cis-acting regulatory element related to meristem expression         |
| <i>Arabidopsis thaliana</i> | part of a light responsive element                                   |
| <i>Pisum sativum</i>        | cis-acting regulatory element involved in light responsiveness       |
| <i>Spinacia oleracea</i>    | part of a light responsive element                                   |
| <i>Hordeum vulgare</i>      | cis-acting regulatory element involved in the MeJA-responsiveness    |
| <i>Nicotiana tabacum</i>    | cis-acting element involved in defense and stress responsiveness     |
| <i>Hordeum vulgare</i>      | cis-acting element involved in low-temperature responsiveness        |
| <i>Hordeum vulgare</i>      | cis-acting element involved in low-temperature responsiveness        |
| <i>Brassica oleracea</i>    | auxin-responsive element                                             |
| <i>Zea mays</i>             | cis-acting regulatory element involved in light responsiveness       |
| <i>Oryza sativa</i>         | gibberellin-responsive element                                       |
| <i>Nicotiana tabacum</i>    | cis-acting regulatory element involved in auxin responsiveness       |
| <i>Arabidopsis thaliana</i> | cis-acting element involved in the abscisic acid responsiveness      |

|                      |                                                                      |
|----------------------|----------------------------------------------------------------------|
| Petroselinum crispum | part of a conserved DNA module involved in light responsiveness      |
| Arabidopsis thaliana | cis-acting regulatory element related to meristem expression         |
| Hordeum vulgare      | cis-acting regulatory element involved in the MeJA-responsiveness    |
| Pisum sativum        | cis-acting regulatory element involved in light responsiveness       |
| Arabidopsis thaliana | cis-acting regulatory element involved in light responsiveness       |
| Hordeum vulgare      | cis-acting regulatory element involved in the MeJA-responsiveness    |
| Nicotiana tabacum    | cis-acting element involved in defense and stress responsiveness     |
| Flaveria trinervia   | part of a light responsive element                                   |
| Hordeum vulgare      | cis-acting regulatory element involved in the MeJA-responsiveness    |
| Petroselinum crispum | part of a conserved DNA module involved in light responsiveness      |
| Petroselinum crispum | part of a conserved DNA module involved in light responsiveness      |
| Petroselinum crispum | part of a conserved DNA module involved in light responsiveness      |
| Petroselinum crispum | part of a conserved DNA module involved in light responsiveness      |
| Petroselinum crispum | part of a conserved DNA module involved in light responsiveness      |
| Arabidopsis thaliana | cis-acting regulatory element related to meristem expression         |
| Arabidopsis thaliana | cis-acting regulatory element related to meristem expression         |
| Zea mays             | cis-acting regulatory element involved in zein metabolism regulation |
| Avena sativa         | light responsive element                                             |
| Arabidopsis thaliana | light responsive element                                             |
| Triticum aestivum    | cis-acting element involved in the abscisic acid responsiveness      |
| Arabidopsis thaliana | cis-acting element involved in the abscisic acid responsiveness      |
| Oryza sativa         | cis-regulatory element involved in endosperm expression              |
| Hordeum vulgare      | cis-acting regulatory element involved in the MeJA-responsiveness    |
| Hordeum vulgare      | cis-acting regulatory element involved in the MeJA-responsiveness    |
| Pisum sativum        | cis-acting regulatory element involved in light responsiveness       |
| Pisum sativum        | cis-acting regulatory element involved in light responsiveness       |
| Petroselinum crispum | part of a conserved DNA module involved in light responsiveness      |
| Petroselinum crispum | part of a conserved DNA module involved in light responsiveness      |
| Arabidopsis thaliana | cis-acting regulatory element related to meristem expression         |
| Arabidopsis thaliana | light responsive element                                             |
| Arabidopsis thaliana | cis-acting element involved in the abscisic acid responsiveness      |
| Arabidopsis thaliana | cis-acting element involved in the abscisic acid responsiveness      |
| Arabidopsis thaliana | cis-acting element involved in the abscisic acid responsiveness      |
| Oryza sativa         | light responsive element                                             |
| Pisum sativum        | part of a light responsive element                                   |
| Arabidopsis thaliana | cis-acting regulatory element involved in light responsiveness       |
| Hordeum vulgare      | cis-acting regulatory element involved in the MeJA-responsiveness    |
| Hordeum vulgare      | cis-acting regulatory element involved in the MeJA-responsiveness    |
| Zea mays             | part of a light responsive element                                   |
| Avena sativa         | light responsive element                                             |
| Arabidopsis thaliana | cis-acting element involved in the abscisic acid responsiveness      |
| Hordeum vulgare      | cis-acting regulatory element involved in the MeJA-responsiveness    |
| Pisum sativum        | cis-acting regulatory element involved in light responsiveness       |
| Zea mays             | cis-acting regulatory element involved in zein metabolism regulation |
| Petroselinum crispum | part of a conserved DNA module involved in light responsiveness      |
| Petroselinum crispum | part of a conserved DNA module involved in light responsiveness      |

|                             |                                                                   |
|-----------------------------|-------------------------------------------------------------------|
| <i>Hordeum vulgare</i>      | cis-acting regulatory element involved in the MeJA-responsiveness |
| <i>Arabidopsis thaliana</i> | part of a module for light response                               |
| <i>Spinacia oleracea</i>    | part of a light responsive element                                |
| <i>Pisum sativum</i>        | part of a light responsive element                                |
| <i>Oryza sativa</i>         | cis-acting element involved in gibberellin-responsiveness         |
| <i>Hordeum vulgare</i>      | cis-acting regulatory element involved in the MeJA-responsiveness |
| <i>Hordeum vulgare</i>      | cis-acting regulatory element involved in the MeJA-responsiveness |
| <i>Hordeum vulgare</i>      | cis-acting regulatory element involved in the MeJA-responsiveness |
| <i>Solanum tuberosum</i>    | light responsive element                                          |
| <i>Spinacia oleracea</i>    | part of a light responsive element                                |
| <i>Petroselinum crispum</i> | MYB binding site involved in light responsiveness                 |
| <i>Petroselinum crispum</i> | MYB binding site involved in light responsiveness                 |
| <i>Zea mays</i>             | cis-acting regulatory element involved in light responsiveness    |
| <i>Oryza sativa</i>         | cis-acting element involved in gibberellin-responsiveness         |
| <i>Arabidopsis thaliana</i> | cis-acting element involved in the abscisic acid responsiveness   |
| <i>Arabidopsis thaliana</i> | cis-acting element involved in the abscisic acid responsiveness   |
| <i>Petroselinum crispum</i> | cis-acting element involved in light responsiveness               |
| <i>Avena sativa</i>         | light responsive element                                          |
| <i>Arabidopsis thaliana</i> | light responsive element                                          |
| <i>Arabidopsis thaliana</i> | light responsive element                                          |
| <i>Arabidopsis thaliana</i> | light responsive element                                          |
| <i>Oryza sativa</i>         | gibberellin-responsive element                                    |
| <i>Arabidopsis thaliana</i> | MYB binding site involved in drought-inducibility                 |
| <i>Pisum sativum</i>        | cis-acting regulatory element involved in light responsiveness    |
| <i>Hordeum vulgare</i>      | cis-acting regulatory element involved in the MeJA-responsiveness |
| <i>Hordeum vulgare</i>      | cis-acting regulatory element involved in the MeJA-responsiveness |
| <i>Hordeum vulgare</i>      | cis-acting regulatory element involved in the MeJA-responsiveness |
| <i>Petroselinum crispum</i> | part of a conserved DNA module involved in light responsiveness   |
| <i>Petroselinum crispum</i> | part of a conserved DNA module involved in light responsiveness   |
| <i>Zea mays</i>             | enhancer-like element involved in anoxic specific inducibility    |
| <i>Hordeum vulgare</i>      | cis-acting element involved in low-temperature responsiveness     |
| <i>Hordeum vulgare</i>      | cis-acting element involved in low-temperature responsiveness     |
| <i>Oryza sativa</i>         | cis-acting element involved in gibberellin-responsiveness         |
| <i>Daucus carota</i>        | part of a light responsive element                                |
| <i>Daucus carota</i>        | part of a light responsive element                                |
| <i>Zea mays</i>             | cis-acting regulatory element involved in light responsiveness    |
| <i>Pisum sativum</i>        | part of a light responsive element                                |
| <i>Arabidopsis thaliana</i> | part of a module for light response                               |
| <i>Spinacia oleracea</i>    | part of a light responsive element                                |
| <i>Spinacia oleracea</i>    | part of a light responsive element                                |
| <i>Arabidopsis thaliana</i> | part of a light responsive element                                |
| <i>Hordeum vulgare</i>      | cis-acting regulatory element involved in the MeJA-responsiveness |
| <i>Hordeum vulgare</i>      | cis-acting regulatory element involved in the MeJA-responsiveness |
| <i>Petroselinum crispum</i> | part of a conserved DNA module involved in light responsiveness   |
| <i>Petroselinum crispum</i> | part of a conserved DNA module involved in light responsiveness   |
| <i>Petroselinum crispum</i> | part of a conserved DNA module involved in light responsiveness   |

|                      |                                                                     |
|----------------------|---------------------------------------------------------------------|
| Petroselinum crispum | light responsive element                                            |
| Arabidopsis thaliana | cis-acting regulatory element related to meristem expression        |
| Hordeum vulgare      | cis-acting regulatory element involved in the MeJA-responsiveness   |
| Hordeum vulgare      | cis-acting regulatory element involved in the MeJA-responsiveness   |
| Pisum sativum        | cis-acting regulatory element involved in light responsiveness      |
| Pisum sativum        | cis-acting regulatory element involved in light responsiveness      |
| Oryza sativa         | gibberellin-responsive element                                      |
| Oryza sativa         | gibberellin-responsive element                                      |
| Arabidopsis thaliana | light responsive element                                            |
| Arabidopsis thaliana | cis-acting element involved in the abscisic acid responsiveness     |
| Arabidopsis thaliana | cis-acting element involved in the abscisic acid responsiveness     |
| Arabidopsis thaliana | cis-acting element involved in the abscisic acid responsiveness     |
| Petroselinum crispum | cis-acting element involved in light responsiveness                 |
| Arabidopsis thaliana | part of a module for light response                                 |
| Arabidopsis thaliana | part of a light responsive element                                  |
| Arabidopsis thaliana | part of a light responsive element                                  |
| Zea mays             | part of a light responsive element                                  |
| Hordeum vulgare      | cis-acting regulatory element involved in the MeJA-responsiveness   |
| Hordeum vulgare      | cis-acting regulatory element involved in the MeJA-responsiveness   |
| Oryza sativa         | cis-acting element involved in gibberellin-responsiveness           |
| Brassica oleracea    | cis-acting regulatory element involved in light responsiveness      |
| Zea mays             | cis-acting regulatory element involved in light responsiveness      |
| Daucus carota        | part of a light responsive element                                  |
| Daucus carota        | part of a light responsive element                                  |
| Oryza sativa         | gibberellin-responsive element                                      |
| Oryza sativa         | gibberellin-responsive element                                      |
| Oryza sativa         | gibberellin-responsive element                                      |
| Arabidopsis thaliana | cis-acting element involved in the abscisic acid responsiveness     |
| Arabidopsis thaliana | cis-acting element involved in the abscisic acid responsiveness     |
| Arabidopsis thaliana | cis-acting element involved in the abscisic acid responsiveness     |
| Arabidopsis thaliana | cis-acting element involved in the abscisic acid responsiveness     |
| Arabidopsis thaliana | light responsive element                                            |
| Arabidopsis thaliana | cis-acting regulatory element related to meristem expression        |
| Arabidopsis thaliana | cis-acting regulatory element related to meristem expression        |
| Zea mays             | cis-acting regulatory element essential for the anaerobic induction |
| Petroselinum crispum | part of a conserved DNA module involved in light responsiveness     |
| Petroselinum crispum | part of a conserved DNA module involved in light responsiveness     |
| Petroselinum crispum | part of a conserved DNA module involved in light responsiveness     |
| Pisum sativum        | cis-acting regulatory element involved in light responsiveness      |
| Pisum sativum        | cis-acting regulatory element involved in light responsiveness      |
| Hordeum vulgare      | cis-acting regulatory element involved in the MeJA-responsiveness   |
| Hordeum vulgare      | cis-acting regulatory element involved in the MeJA-responsiveness   |
| Hordeum vulgare      | cis-acting regulatory element involved in the MeJA-responsiveness   |
| Hordeum vulgare      | cis-acting regulatory element involved in the MeJA-responsiveness   |
| Hordeum vulgare      | cis-acting regulatory element involved in the MeJA-responsiveness   |
| Petroselinum crispum | cis-acting regulatory element                                       |

|                      |                                                                      |
|----------------------|----------------------------------------------------------------------|
| Spinacia oleracea    | part of a light responsive element                                   |
| Zea mays             | cis-acting regulatory element involved in light responsiveness       |
| Zea mays             | cis-acting regulatory element involved in light responsiveness       |
| Zea mays             | cis-acting regulatory element involved in light responsiveness       |
| Daucus carota        | part of a light responsive element                                   |
| Oryza sativa         | cis-acting element involved in gibberellin-responsiveness            |
| Arabidopsis thaliana | cis-acting element involved in the abscisic acid responsiveness      |
| Arabidopsis thaliana | cis-acting element involved in the abscisic acid responsiveness      |
| Arabidopsis thaliana | cis-acting element involved in the abscisic acid responsiveness      |
| Arabidopsis thaliana | cis-acting element involved in the abscisic acid responsiveness      |
| Arabidopsis thaliana | light responsive element                                             |
| Nicotiana tabacum    | cis-acting element involved in salicylic acid responsiveness         |
| Nicotiana tabacum    | cis-acting element involved in salicylic acid responsiveness         |
| Oryza sativa         | gibberellin-responsive element                                       |
| Pisum sativum        | cis-acting regulatory element involved in light responsiveness       |
| Pisum sativum        | cis-acting regulatory element involved in light responsiveness       |
| Hordeum vulgare      | cis-acting regulatory element involved in the MeJA-responsiveness    |
| Hordeum vulgare      | cis-acting regulatory element involved in the MeJA-responsiveness    |
| Hordeum vulgare      | cis-acting regulatory element involved in the MeJA-responsiveness    |
| Arabidopsis thaliana | MYB binding site involved in drought-inducibility                    |
| Zea mays             | cis-acting regulatory element involved in zein metabolism regulation |
| Arabidopsis thaliana | cis-acting regulatory element related to meristem expression         |
| Arabidopsis thaliana | cis-acting regulatory element related to meristem expression         |
| Petroselinum crispum | part of a conserved DNA module involved in light responsiveness      |
| Petroselinum crispum | part of a conserved DNA module involved in light responsiveness      |
| Petroselinum crispum | part of a conserved DNA module involved in light responsiveness      |
| Arabidopsis thaliana | part of a light responsive element                                   |
| Larix laricina       | part of a light responsive element                                   |
| Flaveria trinervia   | part of a light responsive element                                   |
| Brassica oleracea    | auxin-responsive element                                             |
| Brassica oleracea    | auxin-responsive element                                             |
| Glycine max          | binding site of AT-rich DNA binding protein (ATBP-1)                 |
| Brassica oleracea    | gibberellin-responsive element                                       |
| Brassica oleracea    | gibberellin-responsive element                                       |
| Solanum tuberosum    | part of a light responsive element                                   |
| Arabidopsis thaliana | part of a light responsive element                                   |
| Arabidopsis thaliana | part of a light responsive element                                   |
| Arabidopsis thaliana | cis-acting regulatory element involved in light responsiveness       |
| Zea mays             | cis-acting regulatory element involved in light responsiveness       |
| Nicotiana tabacum    | cis-acting element involved in salicylic acid responsiveness         |
| Arabidopsis thaliana | cis-acting element involved in the abscisic acid responsiveness      |
| Arabidopsis thaliana | cis-acting element involved in the abscisic acid responsiveness      |
| Petroselinum crispum | part of a conserved DNA module involved in light responsiveness      |
| Arabidopsis thaliana | MYB binding site involved in drought-inducibility                    |
| Pisum sativum        | part of a conserved DNA module involved in light responsiveness      |
| Pisum sativum        | part of a conserved DNA module involved in light responsiveness      |



|                             |                                                                       |
|-----------------------------|-----------------------------------------------------------------------|
| <i>Pisum sativum</i>        | part of a conserved DNA module involved in light responsiveness       |
| <i>Pisum sativum</i>        | part of a conserved DNA module involved in light responsiveness       |
| <i>Hordeum vulgare</i>      | cis-acting regulatory element involved in the MeJA-responsiveness     |
| <i>Pisum sativum</i>        | cis-acting regulatory element involved in light responsiveness        |
| <i>Pisum sativum</i>        | cis-acting regulatory element involved in light responsiveness        |
| <i>Petroselinum crispum</i> | part of a conserved DNA module involved in light responsiveness       |
| <i>Petroselinum crispum</i> | part of a conserved DNA module involved in light responsiveness       |
| <i>Petroselinum crispum</i> | part of a conserved DNA module involved in light responsiveness       |
| <i>Arabidopsis thaliana</i> | part of a light responsive element                                    |
| <i>Zea mays</i>             | cis-acting regulatory element involved in zein metabolism regulation  |
| <i>Solanum tuberosum</i>    | light responsive element                                              |
| <i>Arabidopsis thaliana</i> | light responsive element                                              |
| <i>Arabidopsis thaliana</i> | cis-acting element involved in the abscisic acid responsiveness       |
| <i>Arabidopsis thaliana</i> | cis-acting element involved in the abscisic acid responsiveness       |
| <i>Arabidopsis thaliana</i> | cis-acting element involved in the abscisic acid responsiveness       |
| <i>Brassica oleracea</i>    | auxin-responsive element                                              |
| <i>Zea mays</i>             | cis-acting regulatory element involved in light responsiveness        |
| <i>Pisum sativum</i>        | part of a conserved DNA module array (CMA3)                           |
| <i>Oryza sativa</i>         | cis-acting element involved in gibberellin-responsiveness             |
| <i>Pisum sativum</i>        | cis-acting element involved in phytochrome down-regulation expression |
| <i>Hordeum vulgare</i>      | cis-acting regulatory element involved in the MeJA-responsiveness     |
| <i>Arabidopsis thaliana</i> | part of a light responsive element                                    |
| <i>Arabidopsis thaliana</i> | part of a module for light response                                   |
| <i>Zea mays</i>             | cis-acting regulatory element involved in light responsiveness        |
| <i>Zea mays</i>             | cis-acting regulatory element involved in light responsiveness        |
| <i>Arabidopsis thaliana</i> | cis-acting regulatory element involved in light responsiveness        |
| <i>Zea mays</i>             | cis-acting regulatory element involved in light responsiveness        |
| <i>Arabidopsis thaliana</i> | cis-acting regulatory element involved in light responsiveness        |
| <i>Glycine max</i>          | part of an auxin-responsive element                                   |
| <i>Brassica oleracea</i>    | auxin-responsive element                                              |
| <i>Hordeum vulgare</i>      | cis-acting element involved in low-temperature responsiveness         |
| <i>Gossypium hirsutum</i>   | part of a light responsive element                                    |
| <i>Flaveria trinervia</i>   | part of a light responsive element                                    |
| <i>Hordeum vulgare</i>      | cis-acting regulatory element involved in the MeJA-responsiveness     |
| <i>Hordeum vulgare</i>      | cis-acting regulatory element involved in the MeJA-responsiveness     |
| <i>Hordeum vulgare</i>      | cis-acting regulatory element involved in the MeJA-responsiveness     |
| <i>Hordeum vulgare</i>      | cis-acting regulatory element involved in the MeJA-responsiveness     |
| <i>Hordeum vulgare</i>      | cis-acting regulatory element involved in the MeJA-responsiveness     |
| <i>Hordeum vulgare</i>      | cis-acting regulatory element involved in the MeJA-responsiveness     |
| <i>Helianthus annuus</i>    | cis-acting regulatory element involved in seed-specific regulation    |
| <i>Petroselinum crispum</i> | cis-acting element involved in light responsiveness                   |
| <i>Petroselinum crispum</i> | cis-acting element involved in light responsiveness                   |
| <i>Arabidopsis thaliana</i> | cis-acting element involved in the abscisic acid responsiveness       |
| <i>Arabidopsis thaliana</i> | cis-acting element involved in the abscisic acid responsiveness       |
| <i>Arabidopsis thaliana</i> | cis-acting element involved in the abscisic acid responsiveness       |
| <i>Oryza sativa</i>         | cis-regulatory element involved in endosperm expression               |

|                      |                                                                   |
|----------------------|-------------------------------------------------------------------|
| Hordeum vulgare      | cis-acting element involved in the abscisic acid responsiveness   |
| Arabidopsis thaliana | cis-acting element involved in the abscisic acid responsiveness   |
| Arabidopsis thaliana | cis-acting element involved in the abscisic acid responsiveness   |
| Arabidopsis thaliana | cis-acting element involved in the abscisic acid responsiveness   |
| Arabidopsis thaliana | cis-acting regulatory element related to meristem expression      |
| Arabidopsis thaliana | part of a light responsive element                                |
| Arabidopsis thaliana | part of a light responsive element                                |
| Petroselinum crispum | part of a conserved DNA module involved in light responsiveness   |
| Pisum sativum        | cis-acting regulatory element involved in light responsiveness    |
| Hordeum vulgare      | cis-acting regulatory element involved in the MeJA-responsiveness |
| Pisum sativum        | part of a conserved DNA module involved in light responsiveness   |
| Nicotiana tabacum    | cis-acting element involved in defense and stress responsiveness  |
| Hordeum vulgare      | cis-acting regulatory element involved in the MeJA-responsiveness |
| Arabidopsis thaliana | cis-acting regulatory element involved in light responsiveness    |
| Arabidopsis thaliana | cis-acting regulatory element involved in light responsiveness    |
| Arabidopsis thaliana | part of a light responsive element                                |
| Arabidopsis thaliana | part of a light responsive element                                |
| Zea mays             | cis-acting regulatory element involved in light responsiveness    |
| Petroselinum crispum | part of a light responsive element                                |
| Hordeum vulgare      | cis-acting regulatory element involved in the MeJA-responsiveness |
| Hordeum vulgare      | cis-acting regulatory element involved in the MeJA-responsiveness |
| Hordeum vulgare      | cis-acting regulatory element involved in the MeJA-responsiveness |
| Hordeum vulgare      | cis-acting regulatory element involved in the MeJA-responsiveness |
| Nicotiana tabacum    | cis-acting element involved in defense and stress responsiveness  |
| Nicotiana tabacum    | cis-acting element involved in defense and stress responsiveness  |
| Nicotiana tabacum    | cis-acting element involved in defense and stress responsiveness  |
| Nicotiana tabacum    | cis-acting element involved in defense and stress responsiveness  |
| Arabidopsis thaliana | MYB binding site involved in drought-inducibility                 |
| Pisum sativum        | cis-acting regulatory element involved in light responsiveness    |
| Hordeum vulgare      | cis-acting regulatory element involved in the MeJA-responsiveness |
| Hordeum vulgare      | cis-acting regulatory element involved in the MeJA-responsiveness |
| Hordeum vulgare      | cis-acting regulatory element involved in the MeJA-responsiveness |
| Hordeum vulgare      | cis-acting regulatory element involved in the MeJA-responsiveness |
| Arabidopsis thaliana | cis-acting regulatory element related to meristem expression      |
| Arabidopsis thaliana | part of a light responsive element                                |
| Arabidopsis thaliana | part of a light responsive element                                |
| Petroselinum crispum | part of a conserved DNA module involved in light responsiveness   |
| Arabidopsis thaliana | cis-acting element involved in the abscisic acid responsiveness   |
| Arabidopsis thaliana | cis-acting element involved in the abscisic acid responsiveness   |
| Oryza sativa         | cis-regulatory element involved in endosperm expression           |
| Hordeum vulgare      | cis-acting regulatory element involved in the MeJA-responsiveness |
| Hordeum vulgare      | cis-acting regulatory element involved in the MeJA-responsiveness |
| Hordeum vulgare      | cis-acting regulatory element involved in the MeJA-responsiveness |
| Arabidopsis thaliana | cis-acting regulatory element involved in light responsiveness    |
| Arabidopsis thaliana | cis-acting regulatory element involved in light responsiveness    |
| Arabidopsis thaliana | cis-acting regulatory element involved in light responsiveness    |

Arabidopsis thaliana light responsive element  
 Arabidopsis thaliana light responsive element  
 Arabidopsis thaliana cis-acting element involved in the abscisic acid responsiveness  
 Arabidopsis thaliana cis-acting element involved in the abscisic acid responsiveness  
 Arabidopsis thaliana cis-acting element involved in the abscisic acid responsiveness  
 Hordeum vulgare part of a light responsive element  
 Petroselinum crispum cis-acting regulatory element  
 Petroselinum crispum MYB binding site involved in light responsiveness  
 Petroselinum crispum MYB binding site involved in light responsiveness  
 Brassica oleracea auxin-responsive element  
 Oryza sativa cis-acting element involved in gibberellin-responsiveness  
 Nicotiana tabacum cis-acting regulatory element involved in auxin responsiveness  
 Hordeum vulgare cis-acting regulatory element involved in the MeJA-responsiveness  
 Hordeum vulgare cis-acting regulatory element involved in the MeJA-responsiveness  
 Hordeum vulgare cis-acting regulatory element involved in the MeJA-responsiveness  
 Petroselinum crispum part of a conserved DNA module involved in light responsiveness  
 Petroselinum crispum part of a conserved DNA module involved in light responsiveness  
 Arabidopsis thaliana cis-acting regulatory element related to meristem expression  
 Arabidopsis thaliana part of a light responsive element  
 Arabidopsis thaliana part of a light responsive element  
 Hordeum vulgare cis-acting regulatory element involved in the MeJA-responsiveness  
 Zea mays part of a light responsive element  
 Nicotiana tabacum cis-acting element involved in defense and stress responsiveness  
 Brassica oleracea cis-acting regulatory element involved in light responsiveness  
 Brassica oleracea cis-acting regulatory element involved in light responsiveness  
 Brassica oleracea cis-acting regulatory element involved in light responsiveness  
 Avena sativa light responsive element  
 Brassica oleracea cis-acting element involved in salicylic acid responsiveness  
 Hordeum vulgare cis-acting regulatory element involved in the MeJA-responsiveness  
 Arabidopsis thaliana cis-acting regulatory element related to meristem expression  
 Petroselinum crispum part of a conserved DNA module involved in light responsiveness  
 Petroselinum crispum part of a conserved DNA module involved in light responsiveness  
 Petroselinum crispum part of a conserved DNA module involved in light responsiveness  
 Hordeum vulgare cis-acting element involved in the abscisic acid responsiveness  
 Arabidopsis thaliana cis-acting element involved in the abscisic acid responsiveness  
 Arabidopsis thaliana cis-acting element involved in the abscisic acid responsiveness  
 Arabidopsis thaliana cis-acting element involved in the abscisic acid responsiveness  
 Oryza sativa gibberellin-responsive element  
 Pisum sativum cis-acting regulatory element involved in light responsiveness  
 Pisum sativum cis-acting regulatory element involved in light responsiveness  
 Arabidopsis thaliana element involved in differentiation of the palisade mesophyll cells  
 Arabidopsis thaliana cis-acting regulatory element related to meristem expression  
 Petroselinum crispum part of a conserved DNA module involved in light responsiveness  
 Petroselinum crispum part of a conserved DNA module involved in light responsiveness  
 Petroselinum crispum part of a conserved DNA module involved in light responsiveness  
 Petroselinum crispum part of a conserved DNA module involved in light responsiveness

|                      |                                                                   |
|----------------------|-------------------------------------------------------------------|
| Petroselinum crispum | part of a conserved DNA module involved in light responsiveness   |
| Petroselinum crispum | cis-acting regulatory element                                     |
| Arabidopsis thaliana | cis-acting regulatory element involved in light responsiveness    |
| Hordeum vulgare      | cis-acting regulatory element involved in the MeJA-responsiveness |
| Nicotiana tabacum    | cis-acting element involved in defense and stress responsiveness  |
| Brassica oleracea    | auxin-responsive element                                          |
| Oryza sativa         | cis-regulatory element involved in endosperm expression           |
| Arabidopsis thaliana | light responsive element                                          |
| Arabidopsis thaliana | light responsive element                                          |
| Avena sativa         | light responsive element                                          |
| Arabidopsis thaliana | light responsive element                                          |
| Avena sativa         | light responsive element                                          |
| Avena sativa         | light responsive element                                          |
| Nicotiana tabacum    | cis-acting regulatory element involved in auxin responsiveness    |
| Arabidopsis thaliana | cis-acting element involved in the abscisic acid responsiveness   |
| Arabidopsis thaliana | cis-acting element involved in the abscisic acid responsiveness   |
| Petroselinum crispum | part of a conserved DNA module involved in light responsiveness   |
| Arabidopsis thaliana | cis-acting regulatory element related to meristem expression      |
| Pisum sativum        | part of a conserved DNA module involved in light responsiveness   |
| Hordeum vulgare      | cis-acting regulatory element involved in the MeJA-responsiveness |
| Pisum sativum        | cis-acting regulatory element involved in light responsiveness    |
| Brassica oleracea    | auxin-responsive element                                          |
| Arabidopsis thaliana | cis-acting regulatory element involved in light responsiveness    |
| Zea mays             | cis-acting regulatory element involved in light responsiveness    |
| Zea mays             | cis-acting regulatory element involved in light responsiveness    |
| Arabidopsis thaliana | part of a module for light response                               |
| Hordeum vulgare      | cis-acting regulatory element involved in the MeJA-responsiveness |
| Hordeum vulgare      | cis-acting regulatory element involved in the MeJA-responsiveness |
| Hordeum vulgare      | cis-acting regulatory element involved in the MeJA-responsiveness |
| Petroselinum crispum | part of a conserved DNA module involved in light responsiveness   |
| Petroselinum crispum | part of a conserved DNA module involved in light responsiveness   |
| Petroselinum crispum | part of a conserved DNA module involved in light responsiveness   |
| Pisum sativum        | cis-acting regulatory element involved in light responsiveness    |
| Pisum sativum        | cis-acting regulatory element involved in light responsiveness    |
| Hordeum vulgare      | cis-acting regulatory element involved in the MeJA-responsiveness |
| Hordeum vulgare      | cis-acting regulatory element involved in the MeJA-responsiveness |
| Hordeum vulgare      | cis-acting regulatory element involved in the MeJA-responsiveness |
| Arabidopsis thaliana | cis-acting element involved in the abscisic acid responsiveness   |
| Arabidopsis thaliana | cis-acting element involved in the abscisic acid responsiveness   |
| Arabidopsis thaliana | cis-acting element involved in the abscisic acid responsiveness   |
| Arabidopsis thaliana | cis-acting element involved in the abscisic acid responsiveness   |
| Arabidopsis thaliana | cis-acting element involved in the abscisic acid responsiveness   |
| Arabidopsis thaliana | light responsive element                                          |
| Nicotiana tabacum    | cis-acting element involved in salicylic acid responsiveness      |
| Oryza sativa         | gibberellin-responsive element                                    |

*Arabidopsis thaliana* cis-acting element involved in the abscisic acid responsiveness  
*Arabidopsis thaliana* part of a light responsive element  
*Petroselinum crispum* part of a conserved DNA module involved in light responsiveness  
*Petroselinum crispum* part of a conserved DNA module involved in light responsiveness  
*Petroselinum crispum* part of a conserved DNA module involved in light responsiveness  
*Petroselinum crispum* part of a conserved DNA module involved in light responsiveness  
*Petroselinum crispum* part of a conserved DNA module involved in light responsiveness  
*Pisum sativum* cis-acting regulatory element involved in light responsiveness  
*Hordeum vulgare* cis-acting regulatory element involved in the MeJA-responsiveness  
*Hordeum vulgare* cis-acting regulatory element involved in the MeJA-responsiveness  
*Brassica oleracea* auxin-responsive element  
*Petroselinum crispum* MYB binding site involved in light responsiveness  
*Nicotiana tabacum* cis-acting regulatory element involved in auxin responsiveness  
*Arabidopsis thaliana* light responsive element  
*Petroselinum crispum* cis-acting element involved in light responsiveness  
*Arabidopsis thaliana* cis-acting element involved in the abscisic acid responsiveness  
*Arabidopsis thaliana* cis-acting element involved in the abscisic acid responsiveness  
*Oryza sativa* cis-regulatory element involved in endosperm expression  
*Oryza sativa* light responsive element  
*Oryza sativa* gibberellin-responsive element  
*Hordeum vulgare* cis-acting regulatory element involved in the MeJA-responsiveness  
*Hordeum vulgare* cis-acting regulatory element involved in the MeJA-responsiveness  
*Hordeum vulgare* cis-acting regulatory element involved in the MeJA-responsiveness  
*Hordeum vulgare* cis-acting regulatory element involved in the MeJA-responsiveness  
*Hordeum vulgare* cis-acting regulatory element involved in the MeJA-responsiveness  
*Pisum sativum* cis-acting regulatory element involved in light responsiveness  
*Petroselinum crispum* part of a conserved DNA module involved in light responsiveness  
*Petroselinum crispum* part of a conserved DNA module involved in light responsiveness  
*Petroselinum crispum* part of a conserved DNA module involved in light responsiveness  
*Petroselinum crispum* part of a conserved DNA module involved in light responsiveness  
*Petroselinum crispum* part of a conserved DNA module involved in light responsiveness  
*Hordeum vulgare* cis-acting regulatory element involved in the MeJA-responsiveness  
*Hordeum vulgare* cis-acting regulatory element involved in the MeJA-responsiveness  
*Hordeum vulgare* cis-acting regulatory element involved in the MeJA-responsiveness  
*Hordeum vulgare* cis-acting regulatory element involved in the MeJA-responsiveness  
*Hordeum vulgare* cis-acting regulatory element involved in the MeJA-responsiveness  
*Arabidopsis thaliana* cis-acting regulatory element involved in light responsiveness  
*Solanum tuberosum* part of a light responsive element  
*Oryza sativa* cis-acting element involved in gibberellin-responsiveness  
*Hordeum vulgare* cis-acting regulatory element involved in the MeJA-responsiveness  
*Hordeum vulgare* cis-acting regulatory element involved in the MeJA-responsiveness  
*Arabidopsis thaliana* part of a light responsive element  
*Brassica oleracea* cis-acting regulatory element involved in light responsiveness  
*Zea mays* cis-acting regulatory element involved in light responsiveness  
*Glycine max* part of an auxin-responsive element  
*Petroselinum crispum* part of a light responsive element

|                      |                                                                   |
|----------------------|-------------------------------------------------------------------|
| Hordeum vulgare      | cis-acting regulatory element involved in the MeJA-responsiveness |
| Hordeum vulgare      | cis-acting regulatory element involved in the MeJA-responsiveness |
| Arabidopsis thaliana | part of a light responsive element                                |
| Arabidopsis thaliana | part of a light responsive element                                |
| Arabidopsis thaliana | part of a light responsive element                                |
| Arabidopsis thaliana | cis-acting regulatory element related to meristem expression      |
| Arabidopsis thaliana | cis-acting regulatory element related to meristem expression      |
| Petroselinum crispum | part of a conserved DNA module involved in light responsiveness   |
| Petroselinum crispum | part of a conserved DNA module involved in light responsiveness   |
| Petroselinum crispum | part of a conserved DNA module involved in light responsiveness   |
| Arabidopsis thaliana | light responsive element                                          |
| Arabidopsis thaliana | cis-acting element involved in the abscisic acid responsiveness   |
| Hordeum vulgare      | cis-acting element involved in the abscisic acid responsiveness   |
| Arabidopsis thaliana | cis-acting element involved in the abscisic acid responsiveness   |
| Hordeum vulgare      | cis-acting element involved in the abscisic acid responsiveness   |
| Arabidopsis thaliana | cis-acting element involved in the abscisic acid responsiveness   |
| Arabidopsis thaliana | cis-acting element involved in the abscisic acid responsiveness   |
| Glycine max          | part of an auxin-responsive element                               |
| Nicotiana tabacum    | cis-acting element involved in salicylic acid responsiveness      |
| Brassica oleracea    | cis-acting element involved in salicylic acid responsiveness      |
| Hordeum vulgare      | cis-acting regulatory element involved in the MeJA-responsiveness |
| Hordeum vulgare      | cis-acting regulatory element involved in the MeJA-responsiveness |
| Hordeum vulgare      | cis-acting regulatory element involved in the MeJA-responsiveness |
| Hordeum vulgare      | cis-acting regulatory element involved in the MeJA-responsiveness |
| Pisum sativum        | cis-acting regulatory element involved in light responsiveness    |
| Pisum sativum        | cis-acting regulatory element involved in light responsiveness    |
| Arabidopsis thaliana | part of a light responsive element                                |
| Hordeum vulgare      | cis-acting regulatory element involved in the MeJA-responsiveness |
| Hordeum vulgare      | cis-acting regulatory element involved in the MeJA-responsiveness |
| Hordeum vulgare      | cis-acting regulatory element involved in the MeJA-responsiveness |
| Hordeum vulgare      | cis-acting regulatory element involved in the MeJA-responsiveness |
| Arabidopsis thaliana | cis-acting regulatory element involved in light responsiveness    |
| Brassica oleracea    | cis-acting regulatory element involved in light responsiveness    |
| Zea mays             | cis-acting regulatory element involved in light responsiveness    |
| Petroselinum crispum | part of a conserved DNA module involved in light responsiveness   |
| Petroselinum crispum | part of a conserved DNA module involved in light responsiveness   |
| Petroselinum crispum | part of a conserved DNA module involved in light responsiveness   |
| Petroselinum crispum | part of a conserved DNA module involved in light responsiveness   |
| Petroselinum crispum | part of a conserved DNA module involved in light responsiveness   |
| Petroselinum crispum | part of a conserved DNA module involved in light responsiveness   |
| Pisum sativum        | cis-acting regulatory element involved in light responsiveness    |
| Hordeum vulgare      | cis-acting regulatory element involved in the MeJA-responsiveness |
| Hordeum vulgare      | cis-acting regulatory element involved in the MeJA-responsiveness |
| Nicotiana tabacum    | cis-acting element involved in salicylic acid responsiveness      |
| Arabidopsis thaliana | cis-acting element involved in the abscisic acid responsiveness   |
| Arabidopsis thaliana | cis-acting element involved in the abscisic acid responsiveness   |

|                             |                                                                   |
|-----------------------------|-------------------------------------------------------------------|
| <i>Avena sativa</i>         | light responsive element                                          |
| <i>Solanum tuberosum</i>    | light responsive element                                          |
| <i>Arabidopsis thaliana</i> | cis-acting regulatory element involved in light responsiveness    |
| <i>Brassica oleracea</i>    | auxin-responsive element                                          |
| <i>Nicotiana tabacum</i>    | cis-acting element involved in defense and stress responsiveness  |
| <i>Hordeum vulgare</i>      | cis-acting regulatory element involved in the MeJA-responsiveness |
| <i>Hordeum vulgare</i>      | cis-acting regulatory element involved in the MeJA-responsiveness |
| <i>Solanum tuberosum</i>    | light responsive element                                          |
| <i>Arabidopsis thaliana</i> | light responsive element                                          |
| <i>Hordeum vulgare</i>      | cis-acting regulatory element involved in the MeJA-responsiveness |
| <i>Spinacia oleracea</i>    | part of a light responsive element                                |
| <i>Nicotiana tabacum</i>    | cis-acting element involved in defense and stress responsiveness  |
| <i>Hordeum vulgare</i>      | cis-acting regulatory element involved in the MeJA-responsiveness |
| <i>Arabidopsis thaliana</i> | part of a light responsive element                                |
| <i>Hordeum vulgare</i>      | cis-acting regulatory element involved in the MeJA-responsiveness |
| <i>Pisum sativum</i>        | cis-acting regulatory element involved in light responsiveness    |
| <i>Oryza sativa</i>         | gibberellin-responsive element                                    |
| <i>Oryza sativa</i>         | cis-regulatory element involved in endosperm expression           |
| <i>Arabidopsis thaliana</i> | light responsive element                                          |
| <i>Arabidopsis thaliana</i> | cis-acting element involved in the abscisic acid responsiveness   |
| <i>Triticum aestivum</i>    | cis-acting element involved in the abscisic acid responsiveness   |
| <i>Arabidopsis thaliana</i> | cis-acting element involved in the abscisic acid responsiveness   |
| <i>Arabidopsis thaliana</i> | cis-acting element involved in the abscisic acid responsiveness   |
| <i>Solanum tuberosum</i>    | part of a light responsive element                                |
| <i>Zea mays</i>             | cis-acting regulatory element involved in light responsiveness    |
| <i>Brassica napus</i>       | cis-acting regulatory element involved in light responsiveness    |
| <i>Arabidopsis thaliana</i> | cis-acting regulatory element involved in light responsiveness    |
| <i>Spinacia oleracea</i>    | part of a light responsive element                                |
| <i>Arabidopsis thaliana</i> | part of a module for light response                               |
| <i>Petroselinum crispum</i> | cis-acting regulatory element                                     |
| <i>Hordeum vulgare</i>      | cis-acting regulatory element involved in the MeJA-responsiveness |
| <i>Larix laricina</i>       | part of a light responsive element                                |
| <i>Spinacia oleracea</i>    | part of a light responsive element                                |
| <i>Arabidopsis thaliana</i> | part of a light responsive element                                |
| <i>Nicotiana tabacum</i>    | cis-acting element involved in defense and stress responsiveness  |
| <i>Nicotiana tabacum</i>    | cis-acting element involved in defense and stress responsiveness  |
| <i>Brassica oleracea</i>    | auxin-responsive element                                          |
| <i>Petroselinum crispum</i> | part of a conserved DNA module involved in light responsiveness   |
| <i>Arabidopsis thaliana</i> | part of a light responsive element                                |
| <i>Arabidopsis thaliana</i> | cis-acting regulatory element related to meristem expression      |
| <i>Arabidopsis thaliana</i> | MYB binding site involved in drought-inducibility                 |
| <i>Hordeum vulgare</i>      | cis-acting regulatory element involved in the MeJA-responsiveness |
| <i>Hordeum vulgare</i>      | cis-acting regulatory element involved in the MeJA-responsiveness |
| <i>Hordeum vulgare</i>      | cis-acting regulatory element involved in the MeJA-responsiveness |
| <i>Hordeum vulgare</i>      | cis-acting regulatory element involved in the MeJA-responsiveness |
| <i>Hordeum vulgare</i>      | cis-acting regulatory element involved in the MeJA-responsiveness |

|                      |                                                                     |
|----------------------|---------------------------------------------------------------------|
| Hordeum vulgare      | cis-acting regulatory element involved in the MeJA-responsiveness   |
| Solanum tuberosum    | part of a light responsive element                                  |
| Brassica oleracea    | gibberellin-responsive element                                      |
| Zea mays             | cis-acting regulatory element involved in light responsiveness      |
| Zea mays             | cis-acting regulatory element involved in light responsiveness      |
| Brassica napus       | cis-acting regulatory element involved in light responsiveness      |
| Arabidopsis thaliana | cis-acting regulatory element involved in light responsiveness      |
| Oryza sativa         | gibberellin-responsive element                                      |
| Oryza sativa         | gibberellin-responsive element                                      |
| Nicotiana tabacum    | cis-acting element involved in salicylic acid responsiveness        |
| Nicotiana tabacum    | cis-acting element involved in salicylic acid responsiveness        |
| Nicotiana tabacum    | cis-acting element involved in salicylic acid responsiveness        |
| Arabidopsis thaliana | light responsive element                                            |
| Arabidopsis thaliana | light responsive element                                            |
| Arabidopsis thaliana | cis-acting element involved in the abscisic acid responsiveness     |
| Arabidopsis thaliana | cis-acting element involved in the abscisic acid responsiveness     |
| Triticum aestivum    | cis-acting element involved in the abscisic acid responsiveness     |
| Arabidopsis thaliana | cis-acting element involved in the abscisic acid responsiveness     |
| Arabidopsis thaliana | cis-acting element involved in the abscisic acid responsiveness     |
| Arabidopsis thaliana | element involved in differentiation of the palisade mesophyll cells |
| Pisum sativum        | cis-acting regulatory element involved in light responsiveness      |
| Oryza sativa         | light responsive element                                            |
| Oryza sativa         | cis-regulatory element involved in endosperm expression             |
| Pisum sativum        | part of a light responsive element                                  |
| Arabidopsis thaliana | cis-acting element involved in the abscisic acid responsiveness     |
| Avena sativa         | light responsive element                                            |
| Solanum tuberosum    | light responsive element                                            |
| Arabidopsis thaliana | light responsive element                                            |
| Arabidopsis thaliana | part of a light responsive element                                  |
| Arabidopsis thaliana | cis-acting regulatory element related to meristem expression        |
| Arabidopsis thaliana | cis-acting regulatory element related to meristem expression        |
| Arabidopsis thaliana | cis-acting regulatory element related to meristem expression        |
| Petroselinum crispum | part of a conserved DNA module involved in light responsiveness     |
| Hordeum vulgare      | cis-acting regulatory element involved in the MeJA-responsiveness   |
| Hordeum vulgare      | cis-acting regulatory element involved in the MeJA-responsiveness   |
| Brassica oleracea    | auxin-responsive element                                            |
| Solanum tuberosum    | part of a light responsive element                                  |
| Arabidopsis thaliana | part of a light responsive element                                  |
| Petroselinum crispum | MYB binding site involved in light responsiveness                   |
| Zea mays             | cis-acting regulatory element involved in light responsiveness      |
| Arabidopsis thaliana | cis-acting regulatory element involved in light responsiveness      |
| Spinacia oleracea    | part of a conserved DNA module involved in light responsiveness     |
| Spinacia oleracea    | part of a conserved DNA module involved in light responsiveness     |
| Hordeum vulgare      | cis-acting regulatory element involved in the MeJA-responsiveness   |
| Hordeum vulgare      | cis-acting regulatory element involved in the MeJA-responsiveness   |
| Hordeum vulgare      | cis-acting regulatory element involved in the MeJA-responsiveness   |



|                      |                                                                    |
|----------------------|--------------------------------------------------------------------|
| Hordeum vulgare      | cis-acting regulatory element involved in the MeJA-responsiveness  |
| Arabidopsis thaliana | cis-acting regulatory element related to meristem expression       |
| Arabidopsis thaliana | cis-acting regulatory element related to meristem expression       |
| Arabidopsis thaliana | cis-acting regulatory element related to meristem expression       |
| Petroselinum crispum | part of a conserved DNA module involved in light responsiveness    |
| Petroselinum crispum | part of a conserved DNA module involved in light responsiveness    |
| Hordeum vulgare      | cis-acting element involved in the abscisic acid responsiveness    |
| Arabidopsis thaliana | cis-acting element involved in the abscisic acid responsiveness    |
| Avena sativa         | light responsive element                                           |
| Arabidopsis thaliana | light responsive element                                           |
| Avena sativa         | light responsive element                                           |
| Arabidopsis thaliana | light responsive element                                           |
| Petroselinum crispum | part of a conserved DNA module involved in light responsiveness    |
| Petroselinum crispum | part of a conserved DNA module involved in light responsiveness    |
| Arabidopsis thaliana | part of a light responsive element                                 |
| Hordeum vulgare      | cis-acting regulatory element involved in the MeJA-responsiveness  |
| Oryza sativa         | light responsive element                                           |
| Petroselinum crispum | cis-acting element involved in light responsiveness                |
| Petroselinum crispum | MYB binding site involved in light responsiveness                  |
| Spinacia oleracea    | part of a conserved DNA module involved in light responsiveness    |
| Petroselinum crispum | cis-acting element involved in light responsiveness                |
| Oryza sativa         | cis-acting element involved in gibberellin-responsiveness          |
| Petroselinum crispum | MYB binding site involved in light responsiveness                  |
| Pisum sativum        | cis-acting regulatory element involved in light responsiveness     |
| Oryza sativa         | cis-regulatory element involved in endosperm expression            |
| Oryza sativa         | involved in endosperm-specific negative expression                 |
| Oryza sativa         | involved in endosperm-specific negative expression                 |
| Oryza sativa         | gibberellin-responsive element                                     |
| Arabidopsis thaliana | cis-acting element involved in the abscisic acid responsiveness    |
| Arabidopsis thaliana | light responsive element                                           |
| Arabidopsis thaliana | light responsive element                                           |
| Arabidopsis thaliana | light responsive element                                           |
| Zea mays             | cis-acting regulatory element involved in light responsiveness     |
| Hordeum vulgare      | cis-acting regulatory element involved in the MeJA-responsiveness  |
| Hordeum vulgare      | cis-acting regulatory element involved in the MeJA-responsiveness  |
| Pisum sativum        | cis-acting regulatory element involved in light responsiveness     |
| Pisum sativum        | cis-acting regulatory element involved in light responsiveness     |
| Hordeum vulgare      | cis-acting regulatory element involved in the MeJA-responsiveness  |
| Pisum sativum        | part of a conserved DNA module involved in light responsiveness    |
| Petroselinum crispum | part of a conserved DNA module involved in light responsiveness    |
| Helianthus annuus    | cis-acting regulatory element involved in seed-specific regulation |
| Arabidopsis thaliana | cis-acting element involved in the abscisic acid responsiveness    |
| Arabidopsis thaliana | cis-acting element involved in the abscisic acid responsiveness    |
| Arabidopsis thaliana | cis-acting element involved in the abscisic acid responsiveness    |
| Arabidopsis thaliana | cis-acting element involved in the abscisic acid responsiveness    |
| Avena sativa         | light responsive element                                           |

|                      |                                                                   |
|----------------------|-------------------------------------------------------------------|
| Arabidopsis thaliana | light responsive element                                          |
| Nicotiana tabacum    | cis-acting element involved in salicylic acid responsiveness      |
| Oryza sativa         | light responsive element                                          |
| Arabidopsis thaliana | cis-acting regulatory element involved in light responsiveness    |
| Arabidopsis thaliana | cis-acting regulatory element involved in light responsiveness    |
| Brassica oleracea    | auxin-responsive element                                          |
| Brassica oleracea    | auxin-responsive element                                          |
| Hordeum vulgare      | cis-acting regulatory element involved in the MeJA-responsiveness |
| Solanum tuberosum    | light responsive element                                          |
| Oryza sativa         | cis-acting element involved in gibberellin-responsiveness         |
| Brassica oleracea    | auxin-responsive element                                          |
| Zea mays             | cis-acting regulatory element involved in light responsiveness    |
| Petroselinum crispum | cis-acting regulatory element                                     |
| Petroselinum crispum | cis-acting regulatory element                                     |
| Hordeum vulgare      | cis-acting regulatory element involved in the MeJA-responsiveness |
| Hordeum vulgare      | cis-acting regulatory element involved in the MeJA-responsiveness |
| Larix laricina       | part of a light responsive element                                |
| Arabidopsis thaliana | part of a light responsive element                                |
| Hordeum vulgare      | cis-acting regulatory element involved in the MeJA-responsiveness |
| Hordeum vulgare      | cis-acting regulatory element involved in the MeJA-responsiveness |
| Nicotiana tabacum    | cis-acting element involved in salicylic acid responsiveness      |
| Brassica oleracea    | cis-acting element involved in salicylic acid responsiveness      |
| Brassica oleracea    | cis-acting element involved in salicylic acid responsiveness      |
| Petroselinum crispum | cis-acting element involved in light responsiveness               |
| Arabidopsis thaliana | cis-acting element involved in the abscisic acid responsiveness   |
| Nicotiana tabacum    | cis-acting regulatory element involved in auxin responsiveness    |
| Arabidopsis thaliana | light responsive element                                          |
