# Supplementary material for: Genome-Wide Identification of Expansin Gene Family and Their Response under Hormone Exposure in Ginkgo biloba L
Source: MDPI journal article supplement (doi:10.3390/ijms24065901), 2023-03-21
Supplement: s1 [file s1]

Table S1. List of expansin (EXP) genes in *Ginkgo biloba*

| Gene name                  | ID                   | Formula                                                                               | Number of amino acids | Molecular Weight/kD | Theoretical pI | Instability index | Aliphatic index | Grand average of hydropathicity (GRAVY) | Predicted subcellular localization |
|----------------------------|----------------------|---------------------------------------------------------------------------------------|-----------------------|---------------------|----------------|-------------------|-----------------|-----------------------------------------|------------------------------------|
| <i>GbEXPA<sub>1</sub></i>  | evm.model.chr1.1594  | C <sub>1210</sub> H <sub>1827</sub> N <sub>339</sub> O <sub>351</sub> S <sub>16</sub> | 247                   | 27251.84            | 8.90           | 37.13             | 67.17           | -0.253                                  | chloroplast                        |
| <i>GbEXPA<sub>2</sub></i>  | evm.model.chr1.1892  | C <sub>1238</sub> H <sub>1880</sub> N <sub>336</sub> O <sub>372</sub> S <sub>18</sub> | 262                   | 27999.65            | 8.06           | 42.10             | 65.99           | -0.069                                  | extracellular                      |
| <i>GbEXPA<sub>3</sub></i>  | evm.model.chr1.2822  | C <sub>1216</sub> H <sub>1813</sub> N <sub>325</sub> O <sub>360</sub> S <sub>14</sub> | 252                   | 27193.57            | 7.55           | 33.32             | 66.59           | -0.122                                  | extracellular                      |
| <i>GbEXPA<sub>4</sub></i>  | evm.model.chr1.2823  | C <sub>1144</sub> H <sub>1711</sub> N <sub>319</sub> O <sub>337</sub> S <sub>13</sub> | 233                   | 25741.88            | 8.76           | 30.97             | 60.64           | -0.404                                  | nucleus                            |
| <i>GbEXPA<sub>5</sub></i>  | evm.model.chr1.2830  | C <sub>1380</sub> H <sub>2089</sub> N <sub>379</sub> O <sub>392</sub> S <sub>15</sub> | 283                   | 30741.97            | 9.03           | 36.48             | 74.77           | -0.036                                  | chloroplast                        |
| <i>GbEXPA<sub>6</sub></i>  | evm.model.chr1.2831  | C <sub>1225</sub> H <sub>1822</sub> N <sub>332</sub> O <sub>358</sub> S <sub>14</sub> | 251                   | 27376.79            | 8.60           | 31.56             | 65.70           | -0.194                                  | extracellular                      |
| <i>GbEXPA<sub>7</sub></i>  | evm.model.chr1.2832  | C <sub>1294</sub> H <sub>1927</sub> N <sub>353</sub> O <sub>386</sub> S <sub>15</sub> | 267                   | 29085.57            | 8.05           | 32.35             | 62.81           | -0.263                                  | nucleus                            |
| <i>GbEXPA<sub>8</sub></i>  | evm.model.chr1.2833  | C <sub>1207</sub> H <sub>1793</sub> N <sub>331</sub> O <sub>356</sub> S <sub>14</sub> | 250                   | 27085.36            | 8.41           | 35.46             | 64.40           | -0.200                                  | extracellular                      |
| <i>GbEXPA<sub>9</sub></i>  | evm.model.chr1.2834  | C <sub>1207</sub> H <sub>1802</sub> N <sub>330</sub> O <sub>353</sub> S <sub>16</sub> | 250                   | 27096.54            | 8.61           | 35.03             | 64.80           | -0.177                                  | extracellular                      |
| <i>GbEXPA<sub>10</sub></i> | evm.model.chr1.2835  | C <sub>1750</sub> H <sub>2653</sub> N <sub>483</sub> O <sub>503</sub> S <sub>19</sub> | 357                   | 39115.39            | 8.87           | 37.34             | 71.88           | -0.198                                  | cytoplasm                          |
| <i>GbEXPA<sub>11</sub></i> | evm.model.chr1.2836  | C <sub>1149</sub> H <sub>1692</sub> N <sub>314</sub> O <sub>337</sub> S <sub>15</sub> | 238                   | 25776.88            | 7.56           | 33.88             | 59.03           | -0.215                                  | chloroplast                        |
| <i>GbEXPA<sub>12</sub></i> | evm.model.chr3.288   | C <sub>1127</sub> H <sub>1704</sub> N <sub>316</sub> O <sub>332</sub> S <sub>15</sub> | 235                   | 25472.74            | 9.19           | 33.21             | 62.34           | -0.190                                  | plasma membrane                    |
| <i>GbEXPA<sub>13</sub></i> | evm.model.chr4.1947  | C <sub>1231</sub> H <sub>1834</sub> N <sub>328</sub> O <sub>361</sub> S <sub>13</sub> | 253                   | 27420.86            | 8.34           | 33.11             | 69.01           | -0.081                                  | extracellular                      |
| <i>GbEXPA<sub>14</sub></i> | evm.model.chr4.2179  | C <sub>1255</sub> H <sub>1857</sub> N <sub>337</sub> O <sub>373</sub> S <sub>18</sub> | 256                   | 28210.66            | 5.50           | 35.68             | 62.46           | -0.205                                  | chloroplast                        |
| <i>GbEXPA<sub>15</sub></i> | evm.model.chr7.379   | C <sub>1216</sub> H <sub>1826</sub> N <sub>332</sub> O <sub>368</sub> S <sub>12</sub> | 257                   | 27368.60            | 6.79           | 31.87             | 67.59           | -0.167                                  | chloroplast                        |
| <i>GbEXPA<sub>16</sub></i> | evm.model.chr8.517   | C <sub>1349</sub> H <sub>1998</sub> N <sub>358</sub> O <sub>405</sub> S <sub>16</sub> | 282                   | 30223.82            | 4.61           | 32.38             | 70.60           | -0.009                                  | chloroplast                        |
| <i>GbEXPA<sub>17</sub></i> | evm.model.chr8.518   | C <sub>1209</sub> H <sub>1809</sub> N <sub>339</sub> O <sub>356</sub> S <sub>14</sub> | 254                   | 27237.56            | 8.63           | 33.11             | 65.71           | -0.166                                  | extracellular                      |
| <i>GbEXPA<sub>18</sub></i> | evm.model.chr9.1784  | C <sub>1241</sub> H <sub>1868</sub> N <sub>342</sub> O <sub>375</sub> S <sub>19</sub> | 259                   | 28187.69            | 5.92           | 44.21             | 64.05           | -0.182                                  | chloroplast                        |
| <i>GbEXPA<sub>19</sub></i> | evm.model.chr9.473   | C <sub>1254</sub> H <sub>1925</sub> N <sub>365</sub> O <sub>356</sub> S <sub>18</sub> | 260                   | 28387.39            | 9.57           | 33.44             | 69.46           | -0.070                                  | nucleus                            |
| <i>GbEXPA<sub>20</sub></i> | evm.model.chr10.1814 | C <sub>1286</sub> H <sub>1959</sub> N <sub>361</sub> O <sub>346</sub> S <sub>13</sub> | 259                   | 28429.69            | 9.98           | 38.13             | 76.45           | -0.059                                  | chloroplast                        |

|                             |                      |                       |     |          |      |       |       |        |                       |
|-----------------------------|----------------------|-----------------------|-----|----------|------|-------|-------|--------|-----------------------|
| <i>GbEXPA</i> <sub>21</sub> | evm.model.chr10.1818 | C1251H1908N346O355S17 | 253 | 28020.04 | 9.09 | 33.45 | 68.58 | -0.251 | chloroplast           |
| <i>GbEXPA</i> <sub>22</sub> | evm.model.chr11.4    | C1403H2103N379O424S19 | 292 | 31672.56 | 5.47 | 24.01 | 65.75 | -0.139 | chloroplast           |
| <i>GbEXPA</i> <sub>23</sub> | evm.model.chr11.464  | C1215H1811N341O367S18 | 255 | 27643.89 | 8.10 | 33.93 | 58.55 | -0.250 | plasma member         |
| <i>GbEXPA</i> <sub>24</sub> | evm.model.chr11.483  | C1106H1644N318O330S12 | 231 | 25059.87 | 8.63 | 34.00 | 60.39 | -0.343 | nucleus               |
| <i>GbEXPA</i> <sub>25</sub> | evm.model.chr11.484  | C1210H1805N331O368S16 | 253 | 27389.60 | 6.79 | 38.20 | 60.91 | -0.231 | chloroplast           |
| <i>GbEXPA</i> <sub>26</sub> | evm.model.chr11.485  | C1207H1799N331O368S16 | 253 | 27347.52 | 6.79 | 38.20 | 60.16 | -0.241 | Chloroplast           |
| <i>GbEXPA</i> <sub>27</sub> | evm.model.chr11.486  | C1204H1792N332O369S15 | 253 | 27302.38 | 7.53 | 36.02 | 58.62 | -0.279 | chloroplast           |
| <i>GbEXPA</i> <sub>28</sub> | evm.model.chr11.488  | C1208H1802N332O368S16 | 253 | 27376.56 | 7.53 | 37.74 | 59.37 | -0.252 | chloroplast           |
| <i>GbEXPA</i> <sub>29</sub> | evm.model.chr11.489  | C1181H1767N333O360S18 | 252 | 26967.12 | 8.03 | 35.17 | 58.93 | -0.183 | extracellular         |
| <i>GbEXPA</i> <sub>30</sub> | evm.model.chr11.490  | C1200H1791N333O367S18 | 254 | 27331.51 | 6.79 | 38.03 | 57.64 | -0.218 | extracellular         |
| <i>GbEXPA</i> <sub>31</sub> | evm.model.chr11.491  | C1104H1645N307O336S13 | 234 | 25010.84 | 8.11 | 25.34 | 59.66 | -0.248 | chloroplast           |
| <i>GbEXPA</i> <sub>32</sub> | evm.model.chr11.6    | C1837H2819N513O522S25 | 370 | 41244.22 | 9.36 | 37.86 | 65.62 | -0.252 | endoplasmic reticulum |
| <i>GbEXPB</i> <sub>1</sub>  | evm.model.chr1.947   | C1271H1941N339O391S13 | 272 | 28643.21 | 4.95 | 35.10 | 76.43 | -0.048 | plasma member         |
| <i>GbEXPB</i> <sub>2</sub>  | evm.model.chr9.667   | C1363H2088N364O398S19 | 279 | 30550.91 | 5.70 | 32.25 | 75.88 | -0.128 | extracellular         |
| <i>GbEXPB</i> <sub>3</sub>  | evm.model.chr9.669   | C1298H1977N347O391S16 | 269 | 29212.03 | 5.33 | 37.51 | 75.06 | -0.131 | extracellular         |
| <i>GbEXPB</i> <sub>4</sub>  | evm.model.chr9.670   | C1347H2065N363O394S17 | 275 | 30193.43 | 6.08 | 38.23 | 75.89 | -0.147 | extracellular         |
| <i>GbEXLA</i> <sub>1</sub>  | evm.model.chr2.1505  | C1344H2054N366O386S19 | 273 | 30124.45 | 8.61 | 37.26 | 75.02 | -0.160 | extracellular         |
| <i>GbEXLA</i> <sub>2</sub>  | evm.model.chr2.1506  | C1315H2031N343O385S15 | 267 | 29286.56 | 8.59 | 34.82 | 77.83 | -0.043 | extracellular         |
| <i>GbEXLA</i> <sub>3</sub>  | evm.model.chr7.777   | C1267H1941N335O353S14 | 254 | 27963.22 | 7.96 | 29.20 | 90.55 | 0.044  | chloroplast           |
| <i>GbEXLA</i> <sub>4</sub>  | evm.model.chr7.785   | C1326H2062N354O405S18 | 271 | 30020.17 | 5.59 | 35.87 | 78.67 | -0.191 | chloroplast           |
| <i>GbEXLA</i> <sub>5</sub>  | evm.model.chr7.786   | C1323H2056N353O404S17 | 268 | 29389.94 | 8.75 | 39.40 | 86.90 | -0.027 | chloroplast           |
| <i>GbEXLB</i> <sub>1</sub>  | evm.model.chr2.1504  | C1190H1823N319O368S20 | 250 | 27127.68 | 4.97 | 32.79 | 72.16 | -0.081 | extracellular         |
| <i>GbEXLB</i> <sub>2</sub>  | evm.model.chr2.1507  | C1205H1820N310O371S18 | 249 | 27162.64 | 4.62 | 29.00 | 76.02 | -0.030 | chloroplast           |
| <i>GbEXLB</i> <sub>3</sub>  | evm.model.chr2.1508  | C1203H1815N311O372S18 | 249 | 27163.59 | 4.62 | 28.40 | 74.46 | -0.070 | chloroplast           |
| <i>GbEXLB</i> <sub>4</sub>  | evm.model.chr5.818   | C1844H2849N515O540S25 | 373 | 41674.53 | 7.87 | 43.77 | 76.33 | -0.248 | extracellular         |
| <i>GbEXLB</i> <sub>5</sub>  | evm.model.chr5.819   | C1199H1821N323O359S19 | 245 | 27113.74 | 6.12 | 37.59 | 73.59 | -0.134 | chloroplast           |

Table S2. GbEXPs primer sequences.

| Gene name            | Forward primer (5' to 3')                    | Reverse primer (5' to 3')                  |
|----------------------|----------------------------------------------|--------------------------------------------|
| <i>GbEXPA31(ORF)</i> | ATGGCCCAGTTTCTCCAGACA                        | TCAATTGCCAAGTTGGGCTCC                      |
| <i>GbEXPA31</i>      | ATGGCCCAGTTTCTCCAGAC                         | CCGTGTTTCGTGCCATATCCTTG                    |
| <i>GbEXPA24</i>      | CTGCAACCAACTTCTGCCCCG                        | GCACAATGCCTGCCCTGTAC                       |
| <i>GbEXPA32</i>      | GGAAGCGATGCCTCAGACACTATG                     | GTGGGTCGTCGTAACACTTGATCTC                  |
| <i>GbEXLA5</i>       | AGGACAAACAGACATAGTGGCAGTG                    | ACCACACCCATTTCCCATCATAACC                  |
| <i>GbEXPA16</i>      | GTTGGAGGAGCAGGAGATGTCATTG                    | GAGAGGCTTTGGGCAGTCAAGTG                    |
| <i>GbEXPB4</i>       | CGGATGAATGCCCAGGAGGATATTG                    | GTCGGTAGAGCCTTCGTTCACATG                   |
| <i>GbEXLB5</i>       | CTATGCACGGGCGAGGGTAA                         | TCCCGAGGTCACTAGGTCGT                       |
| <i>GbEXLB1</i>       | ATGTGGTGCTTGCTATCAGGTGAAG                    | ACTGGATTGCTACAACCTCCCATTGC                 |
| <i>GAPDH</i>         | CTGCCAAGGCTGTAGGTAAGG                        | TCAGATTCCTCCTTGATGGCG                      |
| <i>GbEXPA31-EGFP</i> | ttggagaggacacgctcgag<br>ATGGCCCAGTTTCTCCAGAC | cccttgctcaccatgaattc<br>ATTGCCAAGTTGGGCTCC |
