# Supplementary material for: Genome-Wide Identification of Expansin Gene Family and Their Response under Hormone Exposure in Ginkgo biloba L
Source: MDPI journal article supplement (doi:10.3390/ijms24065901), 2023-03-21
Supplement: s1 [file s1]

| Gene name | Description                |      | Biologic          |  |
|-----------|----------------------------|------|-------------------|--|
|           | Estimated PPV, description |      | Estimated PPV, GO |  |
| GBEXPA1   | 0.69 Expansin              | 0.83 | GO:0009664        |  |
| GBEXPA2   | 0.66 Expansin              | 0.83 | GO:0009664        |  |
| GBEXPA3   | 0.67 Expansin              | 0.83 | GO:0009664        |  |
|           |                            | 0.36 | GO:0006949        |  |
|           |                            | 0.36 | GO:0009635        |  |
| GBEXPA4   | 0.66 Expansin              | 0.83 | GO:0009664        |  |
|           |                            | 0.36 | GO:0006949        |  |
|           |                            | 0.36 | GO:0009635        |  |
|           |                            | 0.83 | GO:0009664        |  |
| GBEXPA5   | 0.68 Expansin              | 0.38 | GO:0006949        |  |
|           |                            | 0.36 | GO:0010114        |  |
|           |                            | 0.36 | GO:0010119        |  |
| GBEXPA6   | 0.67 Expansin              | 0.83 | GO:0009664        |  |
| GBEXPA7   | 0.68 Expansin              | 0.83 | GO:0009664        |  |
| GBEXPA8   | 0.67 Expansin              | 0.83 | GO:0009664        |  |
| GBEXPA9   | 0.64 Expansin              | 0.83 | GO:0009664        |  |
|           |                            | 0.39 | GO:0006949        |  |
|           |                            | 0.38 | GO:0009635        |  |
| GBEXPA10  | 0.68 Expansin              | 0.83 | GO:0009664        |  |
| GBEXPA11  | 0.67 Expansin              | 0.83 | GO:0009664        |  |
| GBEXPB1   | 0.88 Expansin-B16 like     |      |                   |  |
| GBEXPA20  | 0.66 Expansin              | 0.83 | GO:0009664        |  |
|           |                            | 0.37 | GO:0010311        |  |
| GBEXPA21  | 0.67 Expansin              | 0.83 | GO:0009664        |  |

|          |                                    |      |            |
|----------|------------------------------------|------|------------|
| GBEXLB1  | 0.81 Putative expansin/Lol pI      |      |            |
| GBEXLA1  | 0.82 Beta-expansin                 |      |            |
| GBEXLA2  | 0.79 Beta-expansin                 |      |            |
| GBEXLB2  | 0.85 Major pollen allergen Lol pI  |      |            |
| GBEXLB3  | 0.89 Major pollen allergen Lol pI  |      |            |
| GBEXPA12 | 0.67 Expansin                      | 0.83 | GO:0009664 |
| GBEXPA13 | 0.66 Expansin                      | 0.83 | GO:0009664 |
|          |                                    | 0.83 | GO:0009664 |
|          |                                    | 0.41 | GO:0009826 |
|          |                                    | 0.4  | GO:0090376 |
| GBEXPA14 | 0.67 Expansin                      | 0.37 | GO:0000904 |
|          |                                    | 0.37 | GO:0080022 |
|          |                                    | 0.36 | GO:0009834 |
|          |                                    | 0.36 | GO:0042545 |
| GBEXLB4  | 0.2 Major pollen allergen Ory s 1  |      |            |
| GBEXLB5  | 0.76 Major pollen allergen Lol pI  |      |            |
| GBEXPA15 | 0.67 Expansin                      | 0.83 | GO:0009664 |
| GBEXLA3  | 0.66 Major pollen allergen Ory s 1 |      |            |

|          |                                   |      |            |
|----------|-----------------------------------|------|------------|
| GBEXLA4  | 0.65 Major pollen allergen Lol pI |      |            |
| GBEXLA5  | 0.73 Major pollen allergen Lol pI |      |            |
| GBEXPA16 | 0.68 Expansin                     | 0.83 | GO:0009664 |
|          |                                   | 0.38 | GO:0006949 |
|          |                                   | 0.38 | GO:0009635 |
| GBEXPA17 | 0.67 Expansin                     | 0.83 | GO:0009664 |
| GBEXPA18 | 0.65 Expansin                     | 0.83 | GO:0009664 |
| GBEXPA19 | 0.69 Expansin                     | 0.83 | GO:0009664 |
| GBEXPB2  | 0.87 Expansin-B16 like            |      |            |
| GBEXPB3  | 0.85 Expansin-B16 like            |      |            |
| GBEXPB4  | 0.86 Expansin-B16 like            |      |            |
| GBEXPA22 | 0.64 Expansin                     | 0.83 | GO:0009664 |
|          |                                   | 0.43 | GO:0080022 |
|          |                                   | 0.42 | GO:0009826 |
| GBEXPA23 | 0.67 Expansin                     | 0.83 | GO:0009664 |
| GBEXPA24 | 0.67 Expansin                     | 0.82 | GO:0009664 |
|          |                                   | 0.36 | GO:0006949 |
|          |                                   | 0.36 | GO:0042545 |
| GBEXPA25 | 0.66 Expansin                     | 0.83 | GO:0009664 |
|          |                                   | 0.36 | GO:0006949 |
|          |                                   | 0.36 | GO:0009635 |
| GBEXPA26 | 0.68 Expansin                     | 0.83 | GO:0009664 |
| GBEXPA27 | 0.69 Expansin                     | 0.83 | GO:0009664 |

|          |               |      |            |
|----------|---------------|------|------------|
| GBEXPA28 | 0.68 Expansin | 0.83 | GO:0009664 |
| GBEXPA29 | 0.66 Expansin | 0.83 | GO:0009664 |
|          |               | 0.36 | GO:0006949 |
|          |               | 0.36 | GO:0009635 |
| GBEXPA30 | 0.67 Expansin | 0.83 | GO:0009664 |
| GBEXPA31 | 0.66 Expansin | 0.83 | GO:0009664 |
| GBEXPA32 | 0.65 Expansin | 0.83 | GO:0009664 |

| biological process                                                                | Molecular function                | Cellular component                |                      |  |
|-----------------------------------------------------------------------------------|-----------------------------------|-----------------------------------|----------------------|--|
| GO-id, description                                                                | Estimated PPV, GO-id, description | Estimated PPV, GO-id, description |                      |  |
| plant-type cell wall organization                                                 | 0.65                              | GO:0005576                        | extracellular region |  |
|                                                                                   | 0.43                              | GO:0016020                        | membrane             |  |
| plant-type cell wall organization                                                 | 0.65                              | GO:0005576                        | extracellular region |  |
|                                                                                   | 0.43                              | GO:0016020                        | membrane             |  |
| plant-type cell wall organization<br>syncytium formation                          | 0.65                              | GO:0005576                        | extracellular region |  |
|                                                                                   | 0.43                              | GO:0016020                        | membrane             |  |
| response to herbicide<br>plant-type cell wall organization<br>syncytium formation | 0.65                              | GO:0005576                        | extracellular region |  |
|                                                                                   | 0.43                              | GO:0016020                        | membrane             |  |
| response to herbicide<br>plant-type cell wall organization<br>syncytium formation | 0.65                              | GO:0005576                        | extracellular region |  |
|                                                                                   | 0.43                              | GO:0016020                        | membrane             |  |
| response to red light<br>regulation of stomatal movement                          | 0.65                              | GO:0005576                        | extracellular region |  |
|                                                                                   | 0.43                              | GO:0016020                        | membrane             |  |
| plant-type cell wall organization                                                 | 0.65                              | GO:0005576                        | extracellular region |  |
|                                                                                   | 0.43                              | GO:0016020                        | membrane             |  |
| plant-type cell wall organization                                                 | 0.65                              | GO:0005576                        | extracellular region |  |
|                                                                                   | 0.43                              | GO:0016020                        | membrane             |  |
| plant-type cell wall organization                                                 | 0.65                              | GO:0005576                        | extracellular region |  |
|                                                                                   | 0.43                              | GO:0016020                        | membrane             |  |
| plant-type cell wall organization<br>syncytium formation                          | 0.65                              | GO:0005576                        | extracellular region |  |
|                                                                                   | 0.43                              | GO:0016020                        | membrane             |  |
| response to herbicide<br>plant-type cell wall organization                        | 0.65                              | GO:0005576                        | extracellular region |  |
|                                                                                   | 0.43                              | GO:0016020                        | membrane             |  |
| plant-type cell wall organization                                                 | 0.65                              | GO:0005576                        | extracellular region |  |
|                                                                                   | 0.43                              | GO:0016020                        | membrane             |  |
| plant-type cell wall organization<br>lateral root formation                       | 0.65                              | GO:0005576                        | extracellular region |  |
|                                                                                   | 0.43                              | GO:0016020                        | membrane             |  |
| plant-type cell wall organization                                                 | 0.65                              | GO:0005576                        | extracellular region |  |
|                                                                                   | 0.43                              | GO:0016020                        | membrane             |  |

|                                                   |      |            |                                   |
|---------------------------------------------------|------|------------|-----------------------------------|
|                                                   | 0.65 | GO:0005576 | extracellular region              |
|                                                   | 0.32 | GO:0016021 | integral component<br>of membrane |
|                                                   | 0.65 | GO:0005576 | extracellular region              |
|                                                   | 0.65 | GO:0005576 | extracellular region              |
|                                                   | 0.65 | GO:0005576 | extracellular region              |
|                                                   | 0.32 | GO:0016021 | integral component<br>of membrane |
|                                                   | 0.65 | GO:0005576 | extracellular region              |
|                                                   | 0.32 | GO:0016021 | integral component<br>of membrane |
| plant-type cell wall<br>organization              | 0.65 | GO:0005576 | extracellular region              |
| plant-type cell wall<br>organization              | 0.43 | GO:0016020 | membrane                          |
| plant-type cell wall<br>organization              | 0.65 | GO:0005576 | extracellular region              |
| plant-type cell wall<br>organization              | 0.43 | GO:0016020 | membrane                          |
| unidimensional cell growth                        | 0.65 | GO:0005576 | extracellular region              |
| seed trichome<br>differentiation                  | 0.43 | GO:0016020 | membrane                          |
| cell morphogenesis<br>involved in differentiation |      |            |                                   |
| primary root development                          | 0.36 | GO:0005618 | cell wall                         |
| plant-type secondary cell<br>wall biogenesis      |      |            |                                   |
| cell wall modification                            |      |            |                                   |
|                                                   | 0.65 | GO:0005576 | extracellular region              |
|                                                   | 0.65 | GO:0005576 | extracellular region              |
| plant-type cell wall<br>organization              | 0.65 | GO:0005576 | extracellular region              |
|                                                   | 0.43 | GO:0016020 | membrane                          |
|                                                   | 0.65 | GO:0005576 | extracellular region              |
|                                                   | 0.65 | GO:0005576 | extracellular region              |

|                                   |      |            |                                |
|-----------------------------------|------|------------|--------------------------------|
|                                   | 0.34 | GO:0016021 | integral component of membrane |
|                                   | 0.65 | GO:0005576 | extracellular region           |
|                                   | 0.34 | GO:0016021 | integral component of membrane |
| plant-type cell wall organization | 0.65 | GO:0005576 | extracellular region           |
| syncytium formation               | 0.43 | GO:0016020 | membrane                       |
| response to herbicide             |      |            |                                |
| plant-type cell wall organization | 0.65 | GO:0005576 | extracellular region           |
|                                   | 0.43 | GO:0016020 | membrane                       |
| plant-type cell wall organization | 0.65 | GO:0005576 | extracellular region           |
|                                   | 0.43 | GO:0016020 | membrane                       |
| plant-type cell wall organization | 0.65 | GO:0005576 | extracellular region           |
|                                   | 0.43 | GO:0016020 | membrane                       |
|                                   |      |            |                                |
| plant-type cell wall organization | 0.65 | GO:0005576 | extracellular region           |
| primary root development          | 0.43 | GO:0016020 | membrane                       |
| unidimensional cell growth        |      |            |                                |
| plant-type cell wall organization | 0.65 | GO:0005576 | extracellular region           |
|                                   | 0.43 | GO:0016020 | membrane                       |
| plant-type cell wall organization | 0.65 | GO:0005576 | extracellular region           |
| syncytium formation               | 0.43 | GO:0016020 | membrane                       |
| cell wall modification            |      |            |                                |
| plant-type cell wall organization | 0.65 | GO:0005576 | extracellular region           |
| syncytium formation               | 0.43 | GO:0016020 | membrane                       |
| response to herbicide             |      |            |                                |
| plant-type cell wall organization | 0.65 | GO:0005576 | extracellular region           |
| plant-type cell wall organization | 0.65 | GO:0005576 | extracellular region           |

|                                      |      |            |                      |
|--------------------------------------|------|------------|----------------------|
| organization                         | 0.43 | GO:0016020 | membrane             |
| plant-type cell wall<br>organization | 0.65 | GO:0005576 | extracellular region |
| plant-type cell wall<br>organization | 0.43 | GO:0016020 | membrane             |
| syncytium formation                  | 0.65 | GO:0005576 | extracellular region |
| response to herbicide                | 0.43 | GO:0016020 | membrane             |
| plant-type cell wall<br>organization | 0.65 | GO:0005576 | extracellular region |
| plant-type cell wall<br>organization | 0.43 | GO:0016020 | membrane             |
| plant-type cell wall<br>organization | 0.65 | GO:0005576 | extracellular region |
| plant-type cell wall<br>organization | 0.43 | GO:0016020 | membrane             |
| plant-type cell wall<br>organization | 0.65 | GO:0005576 | extracellular region |
| plant-type cell wall<br>organization | 0.43 | GO:0016020 | membrane             |
