# Supplementary material for: Genome-Wide Identification of Expansin Gene Family and Their Response under Hormone Exposure in Ginkgo biloba L
Source: MDPI journal article supplement (doi:10.3390/ijms24065901), 2023-03-21
Supplement: s1 [file s1]

>AtEXP1

MALVTFLFIATLGA

MTSHVNGYAGGGWVNAHATFYGGGDASGTMGGACGYGNLYSQGYGTNTAALSTALFNNGLSGACFEIRCQNDGKWCLP  
GSIVVTATNFCPPNNALPNNAGGCNPPQQHFDLSQPVFQRIAQYRAGIVPVAYRRVPCVRRGGIRFTINGHSYFNLVL  
ITNVGGAGDVHSAMVKGSRGTGWQAMSRNWGNWQSNQSYLNGQSLSFKVTTSDGQTIVSNNVANAGWSFGQTFGAQLR

>AtEXP2

MNLTEYSHILFSLCTLNFCLYSINS

DDNGGWERGHATFYGGDASGTMGGACGYGNLHSQGYGLQTAALSTALFNNGSQKCGACFELQCEDDPEWCIPGSIIVSA  
TNFCPPNFALANDNGGCNPPKHFDAEPFLQIAQYRAGIVPVAFRRVPCVRRGGIRFTINGNPYFDLVLITNVGGA  
GDIRAVSLKGSKTDQWQSMRNWGNWQSNQSYLNGQSLSFQVTTSDGRTVVSYDVVPHDWQFGQTFEGGQF

>AtEXP3

MTATAFRVGLWLAVTASFLLTATNA

KIPGVYSGGPWQNAHATFYGGSDASGTMGGACGYGNLYSQGYGVNTAALSTALFNNGFSCGACFEIKCTDDPRWCVPGN  
PSILVTATNFCPPNFAQPSDDGGWCNPPREHFDLAMPFLKIGLYRAGIVPVSYRRVPCRKIGGIRFTVNGFRYFNLVL  
VTNVAGAGDINGVSVKGSKTDWVRMSRNWGNWQSNQSYLNGQSLSFRTASDRRSSTSWNVAPATWQFGQTFSGKNFRV

>AtEXP4

MAIKLAILFTTFVLFLSLADA

RIPGIYSGGAWQNAHATFYGGSDASGTMGGACGYGNLYSQGYGTNTAALSTALFNNGMSCGACFELKCANDPQWCHSGS  
PSILITATNFCPPNLAQPSDNGGCNPPREHFDLAMPVFLKIAQYRAGIVPVSYRRVPCRKRGGIRFTINGHRYFNLVL  
ITNVAGAGDIVRASVKGSRGTGWMSLSRNWGNWQSNQSYLNGQSLSFRTGSDRRSTSWNMVPSNWQFGQTFVGKNFRV

>AtEXP5

MGVLVISLLVHLLAFSVCVQG

GYRRGGHHPGGHMGPWINAHATFYGGGDASGTMGGACGYGNLYSQGYGLETAALSTALFDQGLSCGACFELMCVNDPQW  
CIKGRSIVVTATNFCPPGACDPPNHHFDLSQPIYEKIALYKSGIIPVMYRRVRCKRSGGIRFTINGHSYFNLVLVTNV  
GGAGDVHSVSMKGSRTKWQLMSRNWGNWQSNQSYLNGQSLSFVTTSDRRSVVSFNVAPPTWSFGQTYTGGQFRY

>AtEXP6

MAMLGLVLSVLTTILALSEA

RIPGVYNGGGWETAHATFYGGSDASGTMGGACGYGNLYSQGYGVNTAALSTALFNNGFSCGACFELKCASDPKWCHSGS  
PSIFITATNFCPPNFAQPSDNGGCNPPRPHFDLAMPFLKIAEYRAGIVPVSFRRVPCRKRGGIRFTINGFRYFNLVL  
VTNVAGAGNIVRLGVKGHTHTSWMTMSRNWGNWQSNQSYLNGQSLSFRTSSDRRSSTSWNIAPANWKFGQTFMGKNFRV

>AtEXP7

MGPISSWSFNKFFSIVFVFAISGEFVAG

YYRPGPWRYAHATFYGDETGGETMGGACGYGNLFNSGYGLSTAALSTTLFNDGYGCGQCFQITCSKSPHCYSGKSTVVT  
ATNLCPNPWYQDSNAGGCNPPRTHFDMAKPAFMKLAYWRAGIIPVAYRRVPCQRSGGMRQFQGNQSYWLLIFVMNVGG

AGDIKSMAVKGSRTNWISMSHNWGASYQAFSSLYGQSLSRVTSYTTGETIYAWNVPANWSSGKTYKSTANFR

>AtEXP8

MYTPSYLKYSIISIISVLFQGTG

DDGGWQGGHATFYGGEDASGTMGGACGYGNLYGQGYGTNTAALSTALFNNGLTCGACYEMKCNDPRWCLGSTITVTAT  
NFCPPNPGLSNDNGGWCNPPLQHFDLAEP AFLQIAQYRAGIVPVSFRRVPCMKKGGIRFTINGHSYFNLVLISNVGGAG  
DVHAVSIKGSKTQSWQAMSRNWGNWQSN SYMNDQSLSFQVTTSDGRTLVSNDVAPSNWQFGQTYQGGQF

>AtEXP9

MAAKVITFMAVMVTAFTANA

KIPGVYTGGPWINAHATFYGEADASGTMGGACGYGNLYSQGYGVNTAALSTALFNNGLSCGSCFELKCINDPGWCLPGN  
PSILITATNFCPPNFNQASDNGGWCNPPREHFDLAMPF LSI AKYKAGIVPVSYRRIPCRKKGGIRFTINGFKYFNLVL  
VTNVAGAGDVIKVSVKGSNTQWLDLSRNWGNWQSNALLVGQSLSRVKTSDGRSSTSNNIAPSNWQFGQTYSGKNFRV

>AtEXP10

MGHLGFLVMIMVGVMASVSG

YGGGWINAHATFYGGGDASGTMGGACGYGNLYSQGYGTSTAALSTALFNNGLSCGSCFEIRCENDGKWCLPGSIVVTAT  
NFCPPNNALANNNGGWCNPPL EHFDLAQPVFQRIAQYRAGIVPVSYRRVPCRRRGIRFTINGHSYFNLVLITNVGGAG  
DVHSAAIKGSRTVWQAMSRNWGNWQSN SYLNGQALSFKVTTSDGRTVVSFNAAPAGWSYGQTFAGGQFR

>AtEXP11

MSKSLAGLAVLAALFIAVDAFR

PSGLTNGHATFYGGSDASGTMGGACGYGDLYSAGYGTMTAALSTALFNDGASCGECYRITCDHAADSRWCLKGASVVIT  
ATNFCPPNFALPNNNGGWCNPPLKHFDMAQPAWEKIGIYRGGIVPVVFQRVSCYKKGGVRF RINGRDYFELVNIQNVGG  
AGSIKSVSIKGSKTGWLAMSRNWGANWQSNAYLDGQALSFSITTTDGATRVFLNVVPSSWSFGQIYSSNVQF

>AtEXP12

MDMKGTYLVTVILLVSTLSVGM

SNGWIRAHATYYGVNDSPASLGGACGYDNPYHAGFGAHTAALSGELFRSGESCGGCYQVRCDFPADPKWCLRGAAVTVT  
ATNFCPTNNNGWCNLPRHHFDMSSPAFFRIARRGNEGIVPVFYRRVGCKRRGGVRF TMRGQGNFMVMISNVGGGGSV  
RSVAVRGSGKGTWLQMTNRNWGANWQSSGDLRGQRLSFKVTLTDSKTQTF LNVVPSSWWFGQTFSSRGRQFV

>AtEXP13

MQRFLPLLLFLALSPPAIC

HYSSSTSSPSSSSVSSDASEWRPARATYYAATNPRDAVGGACGYGDLVKS GYGMATVGLSETL FER GQICGACFELRCV  
DDLRCIPGTSIIL TATNFCAPNYGFD PDGGGHCNPPNKH FVLPIEAFEKIAIWKAGNMPVQYRRINCRKEGSMRFTVD  
GGGIFISVLITNVAGSGDIAAVKIKGSRTGWLPMGRNWGNWHINADLRNQAXSFEVTSSDRSXVTSYNVSPKNWNYGQ  
TFEGKQFETP

>AtEXP14

MEFFGKMIISLSLMMMIMWKSVDG

YSSGWVNARATFYGGADASGTMGGACGYGNLYSQGYGTNTAALSTALFNGGQSCGACFQIKCVDDPKWCIGGTITVTGT  
NFCPPNFAQANNAGWCNPPQHFDLAQPIFLRIAQYKAGVVPVQYRRVACRRKGGIRFTINGHSYFNLVLITNVAGAG  
DVISVSIKGTNTRWQMSRNWQNWQSNAKLDGQALSFKVTTSDGRTVISNNATPRNWSFGQTYTGKQFRAQR

>AtEXP15

MGLLGIALFCFAAMVCSVHG

YDAGWVNAHATFYGGSDASGTMGGACGYGNLYSQGYGTNTAALSTALFNNGLSCGACFEIKCQSDGAWCLPGAIIVTAT  
NFCPPNNALPNNAGWCNPP LHFDLSQPVFQRIAQYKAGVVPVSYRRVPCMRGGIRFTINGHSYFNLVLVTNVGGAG  
DVHSVAVKGSRTRWQQMSRNWQNWQSNL LNGQALSFKVTASDGRTVVSNNIAPASWSFGQTFGTGRQFR

>AtEXP16

MAINPLILLTIFPLFLLLSFTDA

GIPRVFSGGSWQTAHATFYGGNDASGTMGGACGYGNLYSQGYGTNTAALSTSLFNSGQSCGACFEIKCVNDPKWCHPGN  
PSVFTATNFCPPNLAQPSDNGGCNPPRSHFDLAMPVFLKIAEYRAGIVPISYRRVACRKSGGIRFTINGHRYFNLVL  
ITNVAGAGDIARTSVKGSKTGWMSLTRNWQNWQSNVAVLGQSLSFRTSSDRRTSTSWNIAPSNWQFGQTFVGKNFRV

>AtEXP17

MTKIFSLLVAMIFSTMFFMKISSVSA

GWLQAHATFYGGSDASGTMGGACGYGNLYTDGYKTNTAALSTALFNDGKSCGGCYQILCDATKVPQWCLKGKSITITAT  
NFCPPNFAQASDNGGCNPPRPHFDMAQPAFLTIAKYKAGIVPILYKKVGCRRSGGMRFTINGRNYFELVLISNVAGGG  
EISKVWIKGSKSNKWTMSRNWGANYQSNTYLNQSLSFVKVQLSDGSIKAALNVVPSNWRFGQSFKSNVNF

>AtEXP18

MDQNL YRKCLVILSMMAMIGTSMA

TYAGTPWRTASATFYGDDTGSATMGGACGYGNMYDSGYGVATTALSTALFNEGYACGQCFQLKCVSSPNCYYGSPATVV  
TATNICPPNYGQASNNGGCNPPRVHFDLT KPAFMKIANWKAGIIPVSYRRVACKKIGGIRFKFEGNGYWLLVYVMNVG  
GPGDIKTMAVKGSRTGWINMSHNWGASYQAFSSLYGQSLSFRLTSYTTTQTIYAYNAAPASWSAGKTYQSKANFN

>AtEXP19

MNRSITFVLLAVLVSVANLGLA

HVGLTNIDPSWYDAHATFYGDMSGGETMQGACGYGDLFKQGYGLETAALSTALFNNGQTCGACFELMCVSSKWCKPNAG  
SIKITATNFCPPNYQEPVQYHWCNPPNKHFDLSMKMFTTVAEYRAGIVPVKFRRVACHKRGGVRFEIKGNPYIIMVLVY  
NVGGAGDVSNEIRGQKSNWIVMKRNWQIWDTGDLVGQSLSFIVRTSDGRSMTFFNVAPPNWGFGQTYEAKSNF

>AtEXP20

MDSGLQQ LALCLFFILCRLFQATA

EDDWKIATATLSRDRDGSSSVATGGACGYGDLRQSSFAGYSAGLSGKLFNRGSSCGACLEVRCVNHIRWCLQGSPSVVV  
TATDFCPPNSGLSSDYGGWCNFPKEHLELSHAFTGIAETRAEMIPQYRRVKCGRRGGLRFSLSGSSHFFQVLISNVG  
LDGEVVGKVKGHTTAWIPMARNWQNWHSDDLIGQSLSFVTLKGGKTIASYDVAPPYWRFGMTYQGKQFHS

>AtEXP21

MTYVECF MII MATWFMFISYSHG

ANVAAAPGTNGLDTAWYDARAAYYGDHGGGTELEGACGYGDLNKHGYGLATAALSTALFNSGASCGACYEIMCSPNPQ  
GCLSGSIKITATDLCPPGSAWCYLPNKHFDLSLPMFIKIAQVKAKMVPVRYRRVPCAKTGGVKFEVKGNPNILTILPYN  
VGGAGDIIAVSAKGSKTAWVMSRYWGQNWTTNVNLTGQSVSLRVTTSDGITKDFTDVMPASWGFQTFDGKTNF

>AtEXP22

MIYVEFLMIIMVIWVPMMSG

HGAMIGNAVEAPDVAEAPGINDPSKALDTNWDARATFYGDIHGGDTQQGACGYGNLFRQGYGLATAALSTALFNDGYT  
CGACYEIMCTRDPPQWCLPGSVKITATNFCPANYSKTTDLWCNPPQKHFDLSLAMFLKIAKYKAGVVPVRYRRIPCSKTG  
GVKFETKGNPYFLMVLIIYNVGGAGDIKYVQVKGNKTGWITMKNWQNWTTITVLTGQGLSFRVTTSDGITKDFWNVMP  
KNWGFQTFDGRINF

>AtEXP23

MIYVEGFMMIMATLLVMSMSG

HRAMINDVAEAPVFDDVSPNGLDSSWDARATFYGDIHGGDTQQGACGYGDLFKQGYGLETAALSTALFNEGTCGAC  
YQIMCVNDPPQWCLPGSVKITATNFCPPDYSKTEGVWCNPPQKHFDLSLPMFLKIAQYKAGVVPVKYRRISCARTGGVKF  
ETKGNPYFLMILPYNVGGAGDIKLMQVKGDKTGWITMQKNWQNWTTGVNLTGQGISFRVTTSDGVTKDFNNVMPNNWG  
FGQTFDGKINF

>AtEXP24

MELLKRKLYAKILMMVMVIWIAPMTNG

HDHASHVPGGRPGAHPHGAHPAHGAHPHGAHPHGAHPHGAHPHGAHPHGAHPHSHGALPSHGGQVPHSGWGHGRATFYGDINGGET  
QQGACGYGDLHKQGYGLETAALSTALFNNGSRCGACYEIMCEHAPQWCLPGSIKITATNFCPPDFTKPNNDWCNPPQKH  
FDLSQPMFLKIAKYKAGVVPVKFRRVPCAKIGGVKFEIKGNPHFLMILPYNVGGAGAVRAMQIKGTRTQWIAMKNWQ  
IWSGTVLTGQCLSFRLTSDGVMKEFIDVTPPDWKCNGQSFQDKVNF

>AtEXP25

MKLLEQMVYVECFMIIMATLLVMSMSG

HRAMINDVAEAPVIDNVGSPTNGLDSSWDARATFYGDIHGGDTQQGACGYGDLFKQGYGLETAALSTALFNEGTCGA  
CYQIMCVHDPQWCLPGTIKITATNFCPPDYSKTEGVWCNPPQKHFDLSLPMFLKIAQYKAGVVPVKYRRISCARTGGVK  
FETKGNPYFLMILPYNVGGAGDIKLMQVKGDKTGWITMQKNWQNWTTGVNLTGQGISFRVTTSDGVTKDFNNVMPNNW  
GFGQTFDGKINF

>AtEXP26

MKLLEKMIYVEFLMIIMAMWVPMMSG

HGAMIGNAVEAPDVAEAPGINDPSKALDPNWDARATFYGDIHGGDTQQGACGYGNLFRQGYGLATAALSTALFNDGYT  
CGACYEIMCTRDPPQWCLPGSVKITATNFCPANYSKTTDLWCNPPQKHFDLSLAMFLKIAKYKAGVVPVRYRRIPCSKTG  
GVKFETKGNPYFLMVLIIYNVGGAGDIKYVQVKENKTGWITMKNWQNWTTSTVLTGQGLSFRVTTTSDGITKDFWNVMP  
KNWGFQTFDGKINF

>AtEXPB1

MLFPVILPTLCVFLHLLISGSGS

TPPLTHSNQQVAATRWLPATATWYGSAEGDGSSGGACGYGSLVDVKPFKARVGAVSPILFKGGEGCGACYKVRCLDKTI  
CSKRAVTIIATDQSPSGPSAKAKHTHFDLSGAAGFHMAIPGHNGVIRNRGLLNILYRRTACKYRGKNIAFHVNAGSTDY  
WLSLLIEYEDGEDIGSMHIRQAGSKEWISMKHIWGANWCIVEGPLKGPFSVKLTTLSSNNKTLSATDVIPSNWVPKATY  
TSRLNFSPL

>AtEXPB2

MTILVVDRYYML MNLLFALTCLLLNLTHC

FSPKKFNISAATTSDSDWSIAGSTWYGNPTGYGSDGGACGYGNAVAQPPFSKMVSAGGPSLFSKSGKGCACYQVKCTSK  
SACSKNPVTVVITDECPGCVKESVHFDLSGTAFGAMAISGQDSQLRNVGELQILYKKVECNIGKTVTFQVDKGSNANS  
FAVLVAYVNGDGEIGRIELKQALDSKWL SMSQSWGAVWKL DVSSPLRAPLSLRVTSLESGKTVASNVIPANWQPGAI  
YKSNVNF

>AtEXPB3

MLFPVMLATLCIVLQLLIGSSA

LATTNRHVSNSHWLPAVATWYGSPNGDSDGGACGYGTLVDVKPLHARVGAVNPILFKNGEGCGACYKVRCLDKSICSR  
RAVTVIIITDECPGCKSTSTHFDLSGAVFGR LAIAGESGPLNRGLIPVIYRRTACKYRGKNIAFHVNEGSTD FWLSLLV  
EFEDGEDIGSMHIRQAGAREWLEMKHVWGANWCIIIGGPLKGPFSIKLTTL SAGKTL SATDVVPRNWAPKATYSSRLNF  
SPVL

>AtEXPB4

MASSQRYFALLALFAVSLKFCYC

QNETIDVAGSGTAGVTWYGEFPGAGSTGGACGYGSAVANPPLYAMVSAGGPSLFNNGKGCCTCYQVVCIGH PACSGSPI  
TVTITDECPGGPCASEPVHIDL SGKAMGALAKPGQADQLRSAGVIRVNYKRAACLYRGTNIVFRMDAGANPYIISFVVE  
YENG DGLSNVEIQPAGGSFISMQEMRS AVWKVNSGSALRGPFNIRL TSGESHKVIVAYNVIPANWKPDESYSIVNF

>AtEXPB5

MASSSLKCFSFIVLTTFFAISLKPCYC

HNKTHWNTAGITWYGDREGPGTTGGACGYGDAVAKHPYRCMV SAGGPSLFDKGKGCACYRLKCDHPLCTKKPIKVMIS  
DECPGCTKESVHFDLSGKAFGALAKRGKGDQLRNLGELKVS YKRACCKHPKTMIAIHVDAGANPYMSFAVKFANGDGN  
FACIEVQ PAGGQYMKMEEMRS AVWRLSPGVPLKGPFNIRLTS AVSGKKIIAKGV IPEKWSPGAIYHSKVNFPVQRKQK

>AtEXPL1

MGSFLFLIVIFLFSSSVNA

CDRCLHRSKAAYFSSASALSSGACAYGSMATSF FAGHIAAAIPSIYKDGAGCGACFQVRCKNPKLCSTKGTIVMITDLN  
KSNQTDLVLSRAFRAMAKPIVGADKDL LKQGIVDIEYQRVPCDYGNKNMNV RVEEASKKPNYLEIKLLYQGGQTEVVS  
IDIAQVGSSPNWGYMTRSHGAVWVTDKVPTGAIQFRFVVTGGYDGKMIWSQSVLPSNWEAGKIYDAGVQITDIAQEGCD  
PCDAHIWN

>AtEXPL2

MLQGFLLSVLLFSSSAAA

CDRCLHSSKAAYFSSASALSSGACAYGSMATGFFAGHIAAALPSIYKDGSGCGACFQVRCKNPTLCSSKGTIVITDLN  
KTNQTDLVLSRAFRAMAKPVVGADRDLLKQGIVDIEYRRVPCDYGNKKMNV RVEESSKNPNYLAIKLLYQGGQTEVVA  
IYIAQVGSSSHWSYMTRSHGAVWVTDKVPNGALQFRFVVTAGYDGKMVWSQRVLPANWEAGKSYDAGVQITDIAQEGCDP  
CDDHIWN

>AtEXPL3

MRSFLYLIVIFLFSSSVNA

CDRCLHRSKASYFSSASALSSGACAYGPMATSFAGHIAAAIPSIYKDGAGCGACFQVRCKNPCLNSKGTIVMVDLN  
TSNQTDLVLSRAFRAMAKPVGVGDKYLLKQGIVDVEYQRPVPCNYGKRNLNVRVEEASKKPNYLAIKLLYQGGQTEVVG  
IDIAPVGSSQWSYMSRSHGAVWATDKVPTGALQKFVTVGGYDGKTVWSKRVLPANWNSGRIYDAGVQITDIAQEGCDT  
CGHIWN

>AtEXLB

MKHSVLLLLLVQVIVLLPLLCLS

DDFVNSRATYYGSPDCKANPRGHCYGEFGRDINNGEVSGVSWRLWNNGTGCGACYQVRCKIPPHCSEEGVYVWATDSG  
EGDGTDFILSPKAYGRMARPGTENQLYSFGVVNVEYQRIPCRYAGYNLVYKIHEKSYNPHYLAIVLVYGGVNDILAVE  
VWQEDCKEWRMRMRVFGAVHDLQNPGRGTLTLRFLVYGSAGINWIQSPNAIPADWTAGATYDSNILLT

>GbEXPA1

MGLVNDLWYLLFILIAQLFQCDAKQRWSNAHATFYGGSTYAESMGGACGYGSAEEYGRNTAALSTALFNNGQACGSCYE  
IKCSDDPMWCLKGSKVTATN  
FCPPNNALPNDNGGWCNPPLQHFDMSQAFTTIALYHAGIVPVLYRRVHCARKGGIRFSINGNKYFNLVLISNVGGRGD  
VQRVWMKGSKTQWIEMKRNWG  
QNWESGENVCGQSLFRITVSNGKSATSYNVAPSNWQFGQTFVGKQL\*

>GbEXPA2

MAMPSQHGRLLMMGIITLALAMAMAGLKSCTATSDEWSHGATFYGGSDASGMTGGACGYGDLYSSGYGTKAALSTALF  
HNGASCGECFLIKDVAADSQ  
WCLPGKSITITATNFCPPNYDLPSNDGGWCNPPLQHFDMAEPAWEQIAIYRGGIVPVLFKRVPCCKSGGVRFTINGRSY  
FDLVLISNVGGSGVISAVSIK  
GSRTEWQAMSRNWGANWQSNYSINGQSLFRITTSDGKTITFPNVAPSNWQFGQTFSTSLQF\*

>GbEXPA3

MAPATQSITLIFTLLVFLWLISSALGYDGWQTAHATFYGGSDASGMTGGACGYGNLYSQGYGTNTAALSTALFTNGLTC  
GACYEMKCNDDPQWCLPGTVV  
VTATNFCPPNNALPNDNGGWCNPPLQHFDMAEPAYQQIAKYSSGIVPILFRRVPCLKKGGIRFTVNGHSYFNLVLVSNV  
GGAGDVHAVWIKGSKTGWQPM  
SRNWQNWQSNNSNMNGQSLSFKVTTSDGRITVSYNVAPSNWEFGQTFQGTQF\*

>GbEXPA4

MKENCLTVSRFYVLNGTCNTEHNTYIHIEARGYGNLYGQGYGTNTAALSTALFNGLTCGAYYEMKCNDDPQWCLPGT  
VVVTATNFCPPNNALPKHNGG  
WCNPPLQHFDMAEPAYQQIAKYSSGIVPILFRRVPCLKKGGIRFTVNGHSYFNLVLVSNVGGAGDVHPVWIKGSKTGWQ  
PMSRNWQNWQSNNSNMNGQSL  
SFKVTASDGRITVSYNVAPSNWEFGQTFQGTQF\*

>GbEXPA5

MIEILCIPDSRGLGLQILLFVGMEEFRKRCVLKFEPEMASLGFILLGFLSLARFVLVQSWTNAHATFYGGSDASGMTGG  
ACGYGNLYSQGYGTNTAALST  
ALFNGGLSCGACYEVKCSGDPQWCLPRISIVTATNFCPPNFALPNNAGGWCNPPLQHFDLSQPVFQNIKYRAGVVPV  
YRRVPCHRGKGIYTINGHSY  
FNLVLITNVGGAGDVHSVSIKSGKTGWQPMNRNWQNWQSNNTYLNQSLSFKVTTSDGRITVSYNVAPSNWQFGQTFSG  
AQFH\*

>GbEXPA6

MALIYSISLTLLLEFLWLAPRIYGYVDGWQTAHATFYGGSDASGMTGGACGYGNLYSQGYGTNTAALSTALFNGLSCG  
ACYEMKCNDDPQWCLPGTVV  
TATNFCPPNNALPNNNGGWCNPPLQHFDMAEPAYQQIAKYRSGIVPIVFRVPCLKKGGIRFTINGHSYFNLVLVSNV  
GAGDVQAVWIKGSRGWQPM  
RNWQNWQSNNSNMNGQSLSFKVTTSDGRITVSYNVAPSNWQFGQTFQGTQF\*

>GbEXPA7

MKENFLTVSRFYVLNGTCNTEHNTYIHIVGLLWLISSALGYDGWQTAHATFYGGSDASGMTGGACGYGNLYSQGYGTN  
TAALSTALFNGLTCGACYEM  
KCNDDPQWCLPGTVVVTATNFCPPNNALPNDNGGWCNPPLQHFDMAEPAYQQIAKYSSGIVPILFRRVPCLKKGGIRFT  
VNGHSYFNLVLVSNVGGAGDV  
HAVWIKGSKTGWQPMNRNWQNWQSNNSNMNGQSLSFKVTTSDGRITVSYNVAPSKWEFGQTFQGTQF\*

>GbEXPA8

MALVQSIALVASLGFLWLLPRAYGYDGWQTAHATFYGGSDASGTMGGACGYGNLYSQGYGTNTAALSTALFNNGLSCGA  
CYEMQCNDPQWCLPGTVVVT  
ATNFCPPNNALPNDNGGWCNPPLQHFDMAEPAYQQIAKYRSGIVPILFRRVPCLKKGGIRFSINGHSYFNLVLVSNVGG  
AGDVQAVWIKSRTGWQPMR  
NWGQNWQSNYSYMNQSLSFKVTTSDGRTSVSYNVAPSNWQFGQTFQGTQF\*

>GbEXPA9

MALLQSMVLTTLLGFLLLLPRAYGYDGWQTAHATFYGGSDASGTMGGACGYGNLYNQGYGTNTAAVSTALFNNGLSCGA  
CYEMKCNDPQWCLPGTVVVT  
ATNFCPPNNALPNNNGGWCNPPLQHFDMAEPAYQQIAMYRSGIVPILFRRVPCLKKGGIRFTINGHSYFNLVLVSNVGG  
AGDVHAVWIKSGKTGWQPMR  
NWGQNWQSNYSYMNQSLSFKVTTSDGRTAVSYNAAPSNWQFGQTFQGTQF\*

>GbEXPA10

MADLAAYCTYNCLQEHFPAVGKTSQMRMESWKVVRNATKPSNWARDPSPDEILVPTRANIRVLLATAAGLSTTWHWFT  
GAPAHVQVAPSKALEHVHLIR  
TKRLNSMALIESIPLITVLVGLLWLLPRAYGYDGWQTAHATFYGGSDASGTMGGACGYGNLYSQGYGTNTAALSTALFN  
NGLTCGACYEMKCNDPQWCL  
PGTVVVTATNFCPPNNALPNDNGGWCNPPLQHFDMAEPAYEQIAKYRSGIVPILFRRVPCLKKGGIRFTINGHSYFNLV  
LVSNGGPGDVHAVWIKSGT  
GWQPMRWNWQNWQSNYSYMNQSLSFKVTTSDGRTTVSYNVAPSNWQFGQTFQGTQF\*

>GbEXPA11

MGFMCLAFPTLGYDGWETAHATFYGGSDASGTMGGACGYGNLYSHGYGTNTAALSTALFNNGLSCGACYEMKCNDPQW  
CLPGTVVVTATNFCPPNNALP  
NDDGGWCNPPLQHFDMAEPAFLHIKYRSGIVPILFRRVPCLKKGGIRFTINGHSYFNLVLVSNVGGAGDVHAVWIKGS  
RTGWQPLSRNWGQNWQSNYSY  
NGQSLSFKVTTSDGRTSVSYNVAPSNWQFGQTFQGTQF\*

>GbEXPB1

MFAGVSVEAIYFIVIGATLILSSKSVVCIHLKAYGLQEDGTDWQSATATWYGSPDGDGSDGGACGYGDLVKQVPFASKI  
AAGSPVLFKGGKGCACFQVK  
CTDNGLCSETPVTVVITDECPGGAYCGTGKTHFDLSGTAFGAMGAPAKASDLRNTGVVPILFRRVPCEYPGKNIAFHVN  
EGANSNWFVLEIYEDGDGDL  
AAVDLKQANSDAWQGMQVWGANWCLNGGPLKAPFSIRLKSLSGRTLAAANNAIPENWQPSATYRSLVNYND\*

>GbEXPA20

MAGFPLLKFVLFLLGFISLVGLAKGSRRLGWMSAHATFYGGSDASGTLGGACGYGNLYKQGYGIRNAALSTVLFNKGL  
TCGACFEIKCNARLDSQWCV  
GNPSIIVTATNFCPPNNALPNNNGGWCNPPLRHFDMSQPAYQHIALYRAGIVPVLVRRVPCKRRGGIQTFLNGWPYFTL  
VLITNVGGAGEVHRVWIKGSR  
TRGWQPMTRNWGQNWQTNILFSGQSLSFIVTTSDGKSVTSYNVAASNWCYQGTFQGTGKQF\*

>GbEXPA21

MRRLRQGLVLLSIAYLNIQIVSGSLQSKDGWNYGRATFYGDPDALGKMAGACGYGDLYREGYGLSTAALSTVLFNKGQSC  
GACFELRCVDDPLYCHGTSI  
VITATNFCPPNYGLPSDAGGWCNPPREHFIMPVTAFEKIAMWKIGNMNVEYRRVKCQREGGMRFKIAGKDYFYMLITN  
VGGSGEVVAVKMGSRGWLP  
MGRNWGQNWHLNTNLKGQPLSFVTTSDGRTVTSYNVAPPNWEFGQSFVGKQF\*

>GbEXLB1

MASSMMLACCFLLVALLIQKVSACENCNFVTSRATYYGSPDSEGTAGGACGYGSYGRNLNGGDVACVAQLYRNGAGCGA  
CYQVKCTNEDLCTEDGVNIV  
TDYGEGRDTRDILSYRGYTKLARSGKANELVAMGVVAIQFKRVSCQYPGTNIMFKIDENSNFPGYLAFTFWFQGGQKDV  
SAVHVCKDDTLECKLSRNYGA  
VWNVMEPPKGALSVRFLVSDGDDEEQWMTAPNVIPANWTKGALYDSGIQIN\*

>GbEXLA1

MFKSDHMEMYRANILWFMLLMIPAALACDRCLHKSKVAYFAPSHAVNAGACGYGSFGASLKGGFVAAANPKIYRRGVGC  
GACYQIRCTNSALCTKSGVKI  
VVTDLNQNNQTDVLPSPRSFSSALPNKASQLVKMGAVDVEYKRIICEYPGQNMVTKVDKSSNYPYYLAVQFLYQGGQT

DITIVDVAQVGSTDWHYMTRN  
HGA VWDIQKPPNGPLSFR LMVTGGYDGSWVWPKRNL L PANWRPGAVYDSGVQISEIAQEGCYP CETGDWGH DQ\*  
>GbEXLA2  
METFTRTVCLILIFIVTVFAGDPCYDKGKVSYYPSKHSMDAGACRYGTYGATVNGGHVAGASAKFYGGGAICGACYEI  
RCTNSALCTKTGVKVVVDL N  
QSNQTD FVL PFR TFC SLARTG RAAALVKEGIVDVEYKRIFCEYRGHNL TINIEESSKY PYYLALKFLYQGGQTQILTVA  
IYKAGFSDLHYMTRTNSAVWA  
LENPPEGSLSLQIAVTSGFDPMWLSKDNVLP AKWKAGDLFDSGFQIT AIDKGATRPCQSEDKKKFSM\*  
>GbEXLB2  
MASQCFSGGLIFLIMVQAVFCCGDCYVTSRATYYGSPDCLGTAGGACGYGSFGKNLNAGNVA AVSQLYRNGTGCGGCYQ  
VRCTNEDLCTDDGVKIAITDY  
GQGD ETD FILSSRGYSMLARSEKAKELIAAGVVDIEYKRVSCEYPGYNLMFKIDESSSFPDYFALLFWYQAGQKDV LAV  
ELCQEETYEWKAMCRNHGAVW  
DVITPPKGALSLRFLVSDGYQQEWISAANVIPANWKAGSVYDSGIQLSY\*  
>GbEXLB3  
MASQCFSGGLIFLIMVQAGFCCGDCYVTSRATYYGSPDCLGTAGGACGYGSFGKNLNAGNVA AVSQLYRNGTGCGGCYQ  
VRCTNEDLCTDDGVKIAITDY  
GQGD ETD FILSSRGYSMLARSEKAKELIAAGVVDIEYKRVSCEYPGYNLMFKIDESSNFPDYFALLFWYQAGQKDV LAV  
ELCQEETYEWKAMCRNHGAVW  
DVITPPKGALSLRFLVSDGYQQEWISSANVIPANWKAGSVYDSGIQLSY\*  
>GbEXPA12  
MQITVVEGWTA AHATFYGGSDASGT MGGACGYGNLYSTGYGTNTAALSTALFNNGQTCGACFQIKCDAAKVPQWCLSGR  
SITITATNFCPPNNALPNDNG  
GWCNLP LQHFDMSQPAFQQIAMYKAGIVPVVYRRVPCKKMGGIRFTINGLAYFDLVLISNVGGRGDVKA AWIKGSNTGW  
QQMQRNWGANWQSNSYLNQ S  
LSFRVTT SNGRTL TMYNVAPANWEFGQTFTTSRQF\*  
>GbEXPA13  
MGYYSKESILGFICLVFFSLARLVQASEWSNAHATFYGGSDASGT MGGACGYGNLYSQYGTETAALSTALFNNGMSCG  
ACYELQCND DPQWCLPGSIV  
TATNFCPPNYALPNNAGGWCNPPLQHFDLSQP VFLKIAEYRAGIVPVIYRRVPCEKKGGIRFTINGFSYFNLVLITNVG  
GAGDVSAVSIKSGKTGWQPM S  
RNWGQN WQSNSYLNQRLSFKVTTSDGRSVTSYNVVPANWLF GQTFTSGAQFH\*  
>GbEXPA14  
MGSFRLVLFWMAMVAMNCFNHLLVNGDHDNEGWN YAHATFYGGADASGT MAGACGYGNLYSQGYGTTTAALSTVLFNNGQ  
TCGACFELRCVDDPQWCLSGS  
PSVTVTATNFCPPNYALPND DGGWCNPPREHFDMSPAF EKIAIWKAGIVPIQYRRVKCEKQGGIRFTINGNYFYLV L  
ITNVGVDGDVVAVEIKGSR TG  
WMSLSRNWQNWQCNSNL MGQSLSFKVTTSDGRSLTSYDVSPPDWNFGQTFEGKQF\*  
>GbEXLB4  
MTSRILKLVPGVVLVLFMLNGVLSCDDCYIKSRATFYGSVDYLGTPGGACGYKSFG RNLNAGDVAAVAFLYRDGAGCGA  
CYQIRCTDPNLCNSEGINVVV  
TDFGHGDR TDFILSPSAYSKLAINGKSIELVASGVVEIEFRRI SCRYPGYNIMFKVDENSKYPDY LALNIWYQGGRKDI  
VAVEVSLEGSNQWKP CRRSHG  
AVWDIVSPPRGALS VRFLVTDEHQYKEPLISSPEYRWRMKRERDRSEPWERSMQMGAKKNCIHHA IADSLLEYRSAT  
RSCAPMKSLAGSGWFFDAAAG  
RMTHLFCGSDDEEQEEGMTD VFLHDVNTRVEKMYANEF LCKRNLVGSSGRLWHFMIAPL NALGKKISNGFCDP\*  
>GbEXLB5  
MSSRMYILVLFMSIHSVFGCDDCYVKS RATYYGSTDCLGT VGGACGYGVFGRNLNAGDVAGVAQLYRNGTGCGACYQLR  
CTNEDLCTGEGNKIVVTDY GQ  
GDR TDFILSLRAY SRLARAGKSYDLVTSGVVEIEFKRISCSYPGYNLMFKVDESSNYPDY LALLFWYQAGR RDMI AVEL  
SCDQGWKAMCRNHGGVWDMVI  
PPRGALYVRFLMSDGYKSEWVYAKNPI PANWGP GTVYDSGIQTSD\*  
>GbEXPA15  
MALRLIVAALFALACRVKGE GGDYDSGGVWSSAHATFYGGGDASGT MGGACGYGNLYSTGYGTNTAALSTALFKNGEAC



GSCFQIKCNVQEDPQWCLDGA  
PSVVVTATNFCPPNNALPNDNGGCNPPLQHFDSLQPAFQQIARYSGGIVPVSFRRLKCVKKGGIQFTINGHTYFNLVL  
VSNVGGSGDLKSVWIKSGKTG  
WLSMQRNWGANWQSNEYLDGQSLSRVTTGDGYTATSFDVAPADWKYGQSFEGNQIL\*  
>GbEXLA3  
TLIVMFFILSFGPLLYCFSCKEPSSKLIYYLSHCII LVNGACGYGHLGATLYGGNVGVYRKGVGCGACYQIRCTDPQLC  
NKIGTKIVVTGVSHNNKTDV  
VTQRAFVNMAAPDKDDQLLKAGIVGLE YKRIPCQYPGRNLSVNVDKSSRFPSYMAIQFLFQGDQPEIVAVDVAEVASPN  
WHYVHRNHGAVWDISDPPTGP  
LQFRLVITIGYDGKGIWAKHALPANWKPGVIYDTLAQIHDIAQEACGPCETS NW\*  
>GbEXLA4  
MATPVSGFVKEKAALTACL TLLLIVNTALGCDRCVHQSKVAYYAYKGAVNVGACGYGSSGGTLYDGKVGAVSRTMFRKG  
AGCNACYQIRCIDPKLCRNMG  
EKVMVIDFTENDQMDVFVTTQTFSNLALPEKRDELSNKGIVDIEYKRIVCEYMGQNL SVKVDERSNYP SYLVVQFWKQG  
GQTDIEAVDVAQVGSYSWSNM  
KRNFGGVWDIDTPPIGPLQFRVLVTSGYDRKWVSSKYVLP SDWKEGIVYDSGVQIEDIAQESCNPCDTSNW\*  
>GbEXLA5  
KVALTPKRWAFLTACL TLLL IANSALGCDRCVHKS K VAYYANRGAVNVGACGYGSLGATLCDGNVA AVSSTMYRKGVGC  
NACYQIRCINSKICKSGAKV  
IVIDLTENNQTDFVVTTRTFSSALPKKGHALVKMGIVDIEYKRILCEYMGQNF SVK VDESSNYPY LAVQFLYQGGQT  
DIVAVDVAQVGS SNWHYMN RN  
HGGVWDINKPPKGPLQFRFLITGGYDGKWVWSKYVLP SDWKIGIYDSGVQIEDIAQESCSPCDTSNX  
>GbEXPA16  
MELIVGADFIRSI AAAGRPDLVDLSQADFEDIFIMASCNMGVIWFFFLSFAGLVQASDWINAHATFYGGGDASGTMGGA  
CGYGNLYNQGYGTETAALSTA  
LFNNGMSCGACFEIQCTDDPQWCLPGSIVVTATNFCPPNDGLPNDAGGWCNPPLH HFDLAEPVFQKMAKYHAGIVPVVY  
RRVPCEKKG GIRFTINGNPYF  
NLVLISNVGGAGDVIGVSIKGSNTGWQPM SRNWGNWQNSHLTAQSLSFQVTASDGSTVNSYNVAPSDWQFGQTFEGA  
QFN\*  
>GbEXPA17  
MYSKMALAKILVTSFLLAFLWVSPGAHGDGGWRAAHATFYGGNDASGTMGGACGYGNLYSQGYGTNTAALSTALFNNGL  
SCGSCYEIKCNEDPQWCLAGT  
VTVTATNFCPPNNALPNNNGGCNPPLRHFDMAVPAYLHIAKYSSGIVPIIFRRVPCERKGGIRFTINGHSYFNLVLVS  
NVGGAGDVH AVS I KGSNTGWQ  
PMSRNWGNWQNSYLNQSLSMQVTT SNGRTVTS HNVAPPDWQFGQTFEGAQF\*  
>GbEXPA18  
MGSLSRATILALMALLCMHLQE EVMATESNNNDGWSHAHATFYGGSDASGTMAGACGYGNLYSQGYGTTAALSTALFN  
NGQACGACFEIRCVD DPQWCL  
QGSPSVVITATNFCPPNYALPSDDGGWCNPPLRHFDMAVPAFERIAVWKAGIVPVQFRRVKCEKDGLRFTINGNYYFY  
LVLITNVGSDGDVVGVIKGS  
RTGWVPM SRNWGNWQCSTNL MGQSLSF EATTSDGRTVTSYNVAPNHWQFGQTFEGKQY\*  
>GbEXPA19  
MMTKMNTLLL VVAMVCVIWIESSTVVEALARNGWNRGHATFYGSTNAVATMGGACGYDNVYTSYGIYTAALSSALFRE  
GAACGACFEVMCDARSDPQWC  
IRGRRITITATNFCPANTDGGPGWCNPPLQHLDMSMPAFNRIARGYKEGVV GILYRPAGCAKKGGVRFTIKGHSYFNLV  
LITNVGSGSEVRAVWVRGSGS  
NTPWQAMRRNWGANWQSN AFLDRLSLSFRITAGDGKTLTFNNAVRSNWRFGQTFATHQQF\*  
>GbEXPB2  
MAKAIRVIEWMPMPNVVINLTGACFMFLFLKEVETLAF LDQQDLADQLEWRPATATWYGSPSGDGS DGGACGYGNLVD  
QKPLKARVGAVSPVLFKGEGE  
CGACYKVKCMDKSICSDRPVTVIITDECPGGYCAFRTHFDLSGAAFGRMATAGKTPALLNTGELPVLYRRTLCEYPGK  
NITFHVNEGSTDYWF SILIEY  
EDGDGDVGAVHLKEAGSEAWMEMKHVWGANWCLLG GPMKGPFSLRVTSLS SHRTL SARNVIPQHWLPNATYKSRLNFDD  
\*

>GbEXPB3

MTKFLLLDVVSLLLAAFLFWVATHALPLHQSQHIEETDDWQQATATWYGSPNGDGSNGGACGYGSLIQMPYGSKVGA  
GSPVLFRRGGKGCCECYKVKCM  
NNDVCTEKPVTIVITDECPGGYCAFRTHFDLSGTAFSDMAATGKVSALLNVGELPVLYTRTSCEYPGKKIAFHVNEGA  
TDHWFSSVVEYEDGDGDVGAM  
DLMQAGSNSWQAMSQVWGANWCLNDGPLKAPFSIRLRSLSSTARSLRAKNVPEKWQPNATYRSLVNFDD\*

>GbEXPB4

MKTFGCLRWQLSPSTAWLVALAVVITLFIKPTLGVDRELIDAEFQWRPATATWYGSPDGDGSNGGACGYGNLVDVKPM  
RKRVGAVSPVLFKGGEGCGAC  
YKVKCMDESICSDRPVTVIITDECPGGYCAFRTHFDLSGAAFGRMATTGKTPELLNTGELSVLYRRTLCEYPGKNITF  
HVNEGSTDYWFSLIEYEDGD  
GDVGAVHLREAGSEAWMEMKHIWGANWCLLGGPMKAPFSLRVTSLSHKTL SARNVIPQHWLPNATYKSRLNFDD\*

>GbEXPA22

METLLLLCSVVFYSIYMQFLALKGPCNNSNWSFTAREDMKKESSLMILAVMLTFQSTASVRGYPIGGWDEAHATYYGG  
NDASGTNNGACGYGNQLSAGY  
GTITTALSTPLFEQKTCGACYELRCFGGEAEGCLYGSPPVIVTATNFCPPGSFGGWCDPPNVHFDLSEPAFSLHARVP  
VGHVRVGYTRVNCERSGGMR  
TINGHTYFNQVLVTNVGGAGDVEQVWIRGSNSGWMPMVRNWQNWLNNEGMDGQKLSFLVTTSDGRTATSVDVAPPNWQ  
FGQTFSGTQVLSH\*

>GbEXPA23

MASSVENYNNVAMATLLGFMWLLVRSVYGD SGWESAHAATFYGGSDATGTMGGACGYGNLYSQGYGTNTAALSTALFNNG  
LSCGACYEMKCND DPQWCLPG  
TVMVTATNFCPPNNALPNDNGGWCNPPLQHFDMAQPAYQQIAKYRSGIVPIMFRRVACVRKGGVRF TMNGHSYFNLVLI  
SNVGGAGDVHAVSIKGSNTGW  
QPM SRNWQNWQSN SYLNGQSLSFQVTTTRDGR TITSYNVAPSNWQFGQTFQGAQF\*

>GbEXPA24

MAQAVHGTNAHAATFYGGDASGTMGGACGYGNLYSQGYGTNTAALSTALFNNG LSCGACYEIRCND DPQWCLHNTIV  
TATNFCPPNNALPNDNGGWCN  
PPLQHFDLSEPVFQHI AKYRAGIVPVMYQRPVCHKRGGIRFTINGHSYFNLVLI TNVGGAGDVHAVSIKGSRTGWQPM  
RNWQNWQSN SYLNGQSLSF  
VTTSDGKT VTSYNVAPSNWQFGQTFSGRQIY\*

>GbEXPA25

MASFEQSYVILVTL LGLLWMLSRPVYGD SGWESAHAATFYGGSDASGTMGGACGYGNLYSQGYGTNTVALSTALFNNGLS  
CGACYEMKCND DPQWCLPGTV  
TVTATNFCPPNNALPNDNGGWCNPPLQHFDMAQPAYQQIAKYRSGIVPIMFRRVACVRKGGVRF TMNGHSYFNLVLISN  
VGGAGDVKA VSIKGSNTGWQ  
MSRNWQNWQSN SYLDGQSLSFQVTTSDGR TTTSYNVAPSNWQFGQTFEGAQF\*

>GbEXPA26

MASFEQSYVILVTL LGLLWMLSRPVYGD SGWESAHAATFYGGSDASGTMGGACGYGNLYSQGYGTNTAALSTALFNNGLS  
CGACYEMKCND DPQWCLPGTV  
TVTATNFCPPNNALPNDNGGWCNPPLQHFDMAQPAYQQIAKYRSGIVPIMFRRVACVRKGGVRF TMNGHSYFNLVLISN  
VGGAGDVKA VSIKGSNTGWQ  
MSRNWQNWQSN SYLDGQSLSFQVTTSDGR TSTS YNVAPSNWQFGQTFEGAQF\*

>GbEXPA27

MASFEQSYVTLVTL LGLLWKL SRPVYGD SGWQSAHAATFYGGSDASGTMGGACGYGNLYSQGYGTNTAALSTALFNNGLS  
CGACYEMKCND DPQWCLPGTV  
TVTATNFCPPNNALPNDNGGWCNPPLQHFDMAQPAYQQIAKYSSGIVPIMFRRVACVRKGGVRF TMNGHSYFNLVLINN  
VGGAGDVQAVSIKGSNTGWQ  
MSRNWQNWQSN SYLNGQSLSFQVTTSDGR TTTSYNVAPSNWQFGQTFEGAQF\*

>GbEXPA28

MASFEQSYVTLVTL LGLLWMLSRPVYGD SGWQSAHAATFYGGSDASGTMGGACGYGNLYSQGYGTNTAALSTALFNNGLS  
CGACYEMKCND DPQWCLPGTV  
TVTATNFCPPNNALPNDNGGWCNPPLQHFDMAQPAYQQIAKYRSGIVPIMFRRVACVRKGGVRF TMNGHSYFNLVLISN  
VGGAGDVKV VSIKGSNTGWQ

MSRNWQNWQNSYLDGQSLSFQVTTSDGRTTTSYNVAPSNWQFGQTFEGAQF\*  
>GbEXPA29  
MAACTADKIVSATLLGFFLLARAACADSGWQSAHATFYGGSDASGTMGGACGYGNLYSQGYGTNTAALSTSLFNNGLSC  
GACYEMQCNDPQWCLPGTVM  
VTATNFCPPNNALPNDNGGWCNPPQLHFDMAQPAYQQIAKYRSGIVPIMFRRVACVRKGGVRFTMNGHSYFNLVLISNV  
GGAGDVHAVSIKGSNTGWQPM  
SRNWQNWQNSYLNQSLSFQVTTSDGRTITSYNVAPSNWQFGQTFQGAQF\*  
>GbEXPA30  
MASSVESNIVAMATLLGFMWLLVRPVYGDGWSAHAHATFYGGSDASGTMGGACGYGNLYSQGYGTNTAALSTALFNNGL  
SCGACYEMKCNDPQWCLPGT  
VMVTATNFCPPNNALPNDNGGWCNPPQLHFDMAQPAFQQIAKYRSGIVPIMFRRVACVRKGGVRFTMNGHSYFNLVLIS  
NVGGAGDAQSVSIKGSNTGWQ  
PMSRNWQNWQNSYLNQSLSFQVTTSDGRTTTSYNVAPSNWQFGQTFEGAQF\*  
>GbEXPA31  
MAQFLQTWGWTNAHATFYGGSDATGTMGGACGYGNMYSQGYGTNTAALSTALFNNGLSCGACYEIKCNDPQWCLSNIT  
VVTATNFCPPNTALPNNAGGW  
CNPPLLHFDLSEPVFQHIKFRAGIVPVMYQRPVCQKKGGIRFTINGHSYFNLVLLTNVGGAGDVNAVSIKGSNTGWQPM  
MSRNWQNWQNSYLNQSLSFQVTTSDGRTTTSYNVAPSNWQFGQTFEGAQF\*  
FKVTTSDGQTVTSYNAAPSNWQFGQTFSGAQLGN\*  
>GbEXPA32  
MVKEIRVKGGEVSGQSSSIFVCSDDRIFDCSIRFLYICFSWPHTAGRHPQKTKTLKGKEQKNKREHFNCVVRVIA  
SIKEEKNKVKGIEKETQLEGF  
RWSAAITATRMMEYLLAVLMLLISGTSSCMAYGTRGRSFYRAGPVMQAHATFYGGSDASDTMGGACGYGNLYSQGYGVE  
TAALSTALFNDGRSCGACFEI  
KCYDDPQWCLPGRPSIYVTATNFCPPNYALPNDNGGWCNPPRPHFDLSQPIFLKMAEYRAGIVPVQYRRIPCVKGGIR  
FTINGFKYFNLILITNVGGAG  
DVVKARVKGSRGTGWMMSRNWQNWQCDTVLVGQSLSFQVTTSDGRTLTSYNVSPANWQFGQTFSGRQFF\*  
>PtEXPA1  
MAMSSLICIATSLLIIMSSLWMAEARIPGVYSGGAWQNAHATFYGGADASGTMGGACGYGNLYSQGYGVSTAALSTALF  
NNGLTCGSCFEIKC  
ASDPRWCHSGSPSIFITATNFCPPNYALPSDNGGWCNPPRPHFDLAMPFLKIAEYRAGIVPVAYRRVPCRKRGGIRFT  
INGFRYFNLVLISN  
VAGAGDIVQSVKGSKTGWMMSRNWQNWQSNVAVLVGQSLSFVRASDRRSSTSWNIAPAHWQFGQTFGTGNFRV  
>PtEXPA2  
MAAQTFASCLLLFICLHLQSIADYGGWQGGHATFYGGDATGTMGGACGYGNLYSQGYGTSTAALSTALFNNGLSCGA  
CYEMRCDDDPKWCLP  
GTITVTATNFCPPNPSPNNNGGWCNPPQLHFDMAEPALQIAQYRAGIVPVAFRRVPCVKKGGIRFTINGHSYFNLVL  
ITNVGGAGDVHSVSI  
KGSKTGWQAMSRNWQNWQSNYLNQSLSFQVTTSDGRTVTSYNAVPAWQFGQTFEGGQF  
>PtEXPA3  
MALAGIFLVGFLAMVSSVYGYGGGGWINAHATFYGGDASGTMGGACGYGNLYSQGYGTNTAALSTALFNSGLSCGSCY  
EIRCVNDPKWCLPGSI  
VITATNFCPPNNALPNNAGGWCNPPQHFDLSQPVFQHIQAQFRAGIVPVSYRRVPCRRRGGIRFTINGHSYFNLVLITN  
VGGAGDVHSVSIKGSR  
TGWQPMMSRNWQNWQSNYLNQSLSFQVTTSDGRTVVSYNAAPSSWSFGQTFSGAQFR  
>PtEXPA4  
MKMALAGFILVGLLAMVSSVNGYGGGGWINARATFYGGDASGTMGGACGYGNLYSQGYGTNTAALSTALFNSGLSCGS  
CYEIRCVNDPKWCLPGS  
ILVTATNFCPPNNALPNNAGGWCNPPQHFDLSQPVFQHIARYSAGVVPVSYRRVPCRRRGGIRFTINGHSYFNLVLIT  
NVGGAGDVHAVSVKGSR  
TGWQPMMSRNWQNWQSNYLNQSLSFQVTTSDGRTVVSYNAAPSSWSFGQTFSGAQFR  
>PtEXPA5  
MAMGSLLCFTTSLIMMSLMWKGARIPGVYSGGAWQTAHATFYGGADASGTMGGACGYGNLYSQGYGVSTAALSTALF  
NNGLSCGACFEIKCADDP

QWCHSGSPSILITATNFCPPNYALPSDNGGWCNPPRPHFDLAMPFLKIAEYHAGIVPVAYRRVPCRKRGGIRFTINGF  
RYFNLVLISNVAGAGDIV  
QVSVKSGKTGWMSMRNWQSNWQSNVAVLGQSLSFVRASDRRSSTSWNIVPAHWQFGQTFTGKNFRV  
>PtEXPA6  
MALLGFLLVGFLSSVSVHGYGGWINAHATFYGGGDASGTMGGACGYGNLYSQGYGTNTAALSTALFDNGLSCGSCFE  
IRCVNDPQWCLPGVIVTA  
TNFCPPGGWCDPPNHHFDLSQPVFQHIAQYRAGIVPVIYRRIRCRRSGGIRFTINGHSYFNLVLITNVGGAGDVHSAI  
KGSRTGWQMSMRNWQSNWQ  
SNSYLNQSLSFVTTSDGRSVSYNVAPAGWSFGQTYSGGQYRY  
>PtEXPA7  
MTDRATISFISLVLLLSLVEARIPGVYTGAAWQSAHATFYGGNDASGTMGGACGYGNLYSQGYGVNTAALSTALFNGL  
SCGACFEIKCANEPQWCHSGS  
PSIFITATNFCPPNYALPSDNGGWCNPPRPHFDLAMPFLKIAEYRAGIVPVSYRRVPCRKPGGIRFTINGHRYFNLVL  
ITNVAGAGDIVKVSVKGSRTG  
WMSMRNWQSNWQSNVAVLGQSLSFVRTGSDRRTSTSWNVVPSNWQFGQTFAGKNFRV  
>PtEXPA8  
MPPPLPQNPIHTLLKPLLLLLFIFPTATTSLTSSTTTPPLSTTLSQWQSARATYYAASDPRDTVGGACGYGLVKAGY  
GMATVGLSESMFERGQICGACF  
ELKCVDDLRCIPGTSIIVSVTNFCAPNYGFTSDGGGKCNPPNKHVLP IEAFEKIAIWKAANMPVQYRRIKCRKEGGI  
RFNISGSGIFLSVLISNVAGAG  
DVTAVKIKGSRTGWLDMGRNWQSNWQSNVAVLQNALSFVTTSSDRMTVISYNVAPKDWRFQAFEGKQFET  
>PtEXPA9  
MAPFGFLLVGFLSIVSSVHGYGGWINAHATFYGGGDASGTMGGACGYGNLYSQGYGANTAALSTALFDNGLSCGACFE  
IRCVNDPKWCLRGSIIVTATNFC  
PPGGWCDPPNKHFDLSQPVFQHIAQYRAGIVPVIYRRHVKKQLTVVRCRKSGGIRFTINGHSYFNLVLITNVGGAGDVR  
SVAIKGSRTRWQAMSRNWQSNWQ  
SNAYLDGQSLSFVTTSDGRRVSYNVAPAGWSFGQTYSGGQFRY  
>PtEXPA10  
MECLGYTIVILLTMLKIVKGYGTGWTGAHATFYGGGDASGTMGGACGYGNLYSQGYGTNTAALSTALFNGLSCGACFE  
IKCVNDNIWCLRGSIIVTATNFCPPNNALPNDGGWCNPPQHFHDLSPVFKIAQYKAGIVPVQYRRVACRKSGGIRF  
TINGHSYFNLVLITNVGGAGDVAVSIKGTKSNNQAMSRNWQSNWQSNVAVLQNALSFVTTSDGRTVVSNNVAPSNWA  
FGQTYTGRQF  
>PtEXPA11  
MNFLGICLVVFLTMSKTVHGYGGGWSDAHATFYGGGDASGTMGGACGYGNLYSQGYGTNTAALSTALFKNGLTCGACFE  
LKCVNDARWCLSGSIIVTATNFCPPNSAGGWCNPPSQHFHDLSPVFKHLARYKAGIVPVLYRRVACRKTGGIRFTINGH  
SYFNLVLITNVGGAGDVVSISIKGSRTGWQPMRNRWQSNWQSNVAVLQNALSFVTTSDGRSIISSNVAPPNWAFFGQTF  
HGGQF  
>PtEXPA12  
MTMAATISLLLFALHLCLIGTYGDSGGWQGGHATFYGGGDASGTMGGACGYGNLYSQGYGTNTAALSTALFNGLSCGS  
CYEMRCDNDPKWCLPGSITVTATNFCPPNSALSDNNGWCNPPQHFHDLSPVFKIAQYRAGIVPISFRRVPCVKKGG  
IRFTINGHSYFNLVLITNVAGAGDVHVSISIKGSKTGWQAMSRNWQSNWQSNVAVLQNALSFVTTSDGRTVTSYNVPE  
DWQFGQTFSGGQF  
>PtEXPA13  
MAIKAMQDFVQVLYLVLSFLLHGIYGDYGGWQVGHATFYGGSDASGTMGGACGYGNLYSQGYGTSTAALSTALFNGL  
SCGACFQIRCNNDPKWCHSGTITVTATNFCPPNYALSDNNGWCNPPQHFHDLSPVFKIAQYRAGIVPVLFRVPCV  
KKGGIRFTINGHSYFNLVLITNVAGAGDVHAVSIKGSRTGWQMSRNRWQSNWQSNVAVLQNALSFVTTSDGKTVTWYN  
VVPANWQFGQTFAGGQL  
>PtEXPA14  
MQFSVFLQLFLVFSLLFHGTGDRGGWQIGHATFYGGSDASGTMGGACGYGNLYSQGYGTSTAALSTALFNGLSCGAC  
FQIRCNNDPKWCHSGTITVTATNFCPPNYALANDDGGWCNPPQHFHDLSPVFKIAQYRAGIVPVLFRVPCVKKGGI  
RFTINGHSYFNLVLITNVAGAGDVHAVSVKGSRTGWQMSRNRWQSNWQSNVAVLQNALSFVTTSDGTTVTSYNIVPAN  
WQFGQTFEGGQF  
>PtEXPA15  
MAIRATICVASLVFLTLVEARIPGVYTGGAWQSAHATFYGGSDASGTMGGACGYGNLYSQGYGVNTAALSTALFNGL

SCGACFEIKCGNDPQWCHSGSPSILITATNFCPPNYALPSDNGGWCNPPRPHFDLAMPVFLKIAEYRAGIVPVSYRRVP  
CRKRGGIRFQINGHRYFNLLVITNVAGAGDIVKVSVKGSKTGWMSMSRNWQNWQSNVSVGQSLSFRTGSDRRTSTS  
WNVVPSNWQFSQTFVGKNFRV

>PtEXPA16

MAHHRLGLLCIVFLTSVFLAHARIPGVFTGGPWESAHATFYGGSDASGTMGGACGYGNLYSQGYGVNTAALSTALFNN  
GLSCGACFEIKCADDPRWCNPGNPSILVTATNFCPPNFAQPSDNGGWCNPPRPHFDLAMPFLKIAQYRAGIVPVAHRR  
VPCRKQGGIRFTINGFRYFNLLVITNVAGAGDIVNVWIKGSETDWMMSMSRNWQNWQSNVSVGQSLSFVRGSDGRTS  
TSKNVASPNWQFGQTFGKNFRI

>PtEXPA17

MGKLLLAFAIWLQFCNYFAINVNAFAPSGWTKGHATFYGGSDASGTMGGACGYGNLYSTGYGTRTAALSTALFNDGASC  
GECYRIMCDFQTDNRWCIKGRSVTITATNFCPPNFALPNNNGGWCNPPHQHFDMAQPAWEKIGIYRGGIVPVLQFQVPC  
KKHGGVRFRTINGRNYFELVLITNVAGAGSIQSVSIKGSKTGWLAMSRNWGVNWQSNAYLNGQSLSFKVTTTDGQTRFFT  
DIVPANWGFQTFQSSVQF

>PtEXPA18

MGKFLLTFAILLQFCSYLAINVNAFAPSGWRKGHATFYGGSDASGTMGGACGYGNLYSTGYGTRTAALSTALFNDGASC  
GECYRIMCDFQTDNRWCIKGSVTITATNFCPPNYALPNNNGGWCNPPHQHFDMAQPAWEKIGIYRGGIVPVLQFQVPC  
KKHGGVRFRTINGRNYFELVLISNVAGAGSIQSVSIKGSKTGWMAMSRNWGANWQSNAYLNGQSLSFKITNTDGQTRFFT  
DIAPANWGFQTFSSSVQF

>PtEXPA19

MASLSVLSCAVFLFLGIYCTQFHSASAAWQQAHAATFYGGSDASGTMGGACGYGNLYTDGYGIKTAALSTALFNDGKSCG  
GCYQIICDSTKVPQWCLRGKYITITATNFCPPNYNLPNDNGGWCNPPRPHFDMSQPAFQTIKYRAGIVPILYRKVGCD  
RSGGIRFTINGKNYFELVLISNVGGAGDISRVWIKGSKSNQWEAMSRNWGSNWQSLSYLNGQSLSFKIQTNGQTRTAL  
NVAPSNWVFGQSFKSNVQF

>PtEXPA20

MGPFVTLISVLVCQFLFFVCLLSLKGINGGWLNAHATFYGANQSPATLGGACGYDNTFHAGFGVNTAAVSGALFRGGEAC  
GACYQLMCNYRADPKWCLRRAVITVTATNFCPPNNNGGWCDDPRQHFDMSMPAFFRIARQNEGIVPVLVYRRVSCTRRG  
GVRFTLRGQSNFNLVMISNVGGSGDIKAAWVRGSRARSWVPLHRNWGANWQSSFDLRNQKLSFKLTLVDGKLEFFNVV  
PSTWMFGQTFSSRSQ

>PtEXPA21

MGALKAILLYLIIHQTKWITADDEEWKSATATYVKETSGSIIVEGACGYDLHRATYGYKYSAGLSSMLFNRGSTCGACF  
EVRCDHILWCLQGSPSVILTATDFCPPNYGLSSDYGGWCNFPKEHFDMSAAFAEIAEKKADVVPVQHRRVKCDRRGG  
LRFTMSGNFHFYQVLISNVGLDGEVIAVKVKSRTAWIPMARNWQNWQSNINLIGQPLSFVTTSSRRTLTSYNVAPA  
NWQFGQIFEGKQF

>PtEXPA22

MGALKAMLLYLIIHQTKWITADDEEWKSATATYVKETNGSIVVEGACGYADLHKATYGYKYSAGLSSMLFNRGSTCGACF  
EVRCDHILWCLQGSPSVILTATDFCPPNYGLSADYGGWCNFPKEHFDMSAAFAEIAEKKADIVPVQHRRVKCERRGG  
LRFTVSGNFHFYQVLISNVGLDGEVIAVKVKSRTAWIPMARNWQNWQSNVNLIGQPLSFVTTSSRRTLTSYNVAPA  
NWQFGQTFEGKQF

>PtEXPA23

MPPPLLQGPiHTLLKPLLLLLLLLLTLPTTTSHTSSTTTTPPLSTYLSQWQPARATYYAASDPRDTVGGACGYGDLVKA  
GYGMATVALSESMFERGQICGACFEIKCVDLRWCIPGTSIIVSVTNFCAPNYGFPDAGGKCNTPNKHVLPVIESFEK  
IAIWKAANMPVQYRRIKCRKEGGIRFTISGSGIFLSVLISNVAGAGDVTSVRIKGSRTGWLDMGRNWQNWQSNVNLQNLQ  
QALSFEVTSSSHKMTVLSYTVAPKDWRFQTFEGKQFET

>PtEXPA24

MASFFHSWSFSLFLIVLTSAMFIGKSMAGVYGKARVPTVFRPSQWSLAHATFYGDETARETMGGACGYGNLFQTYGTN  
TAALSTTLFNNGYACGTCYQIKCTNAPACYGVITTVTATNICPPNWSQDSNNGGWCNPPRVHFDMSKPAFMKIAQWKAG  
IVPVMYRRVPCARTGGLRFLKQNGYWL LVYVMNVGGGGDIASMVVKGSKTGWISMSHNWGASYQAFASLRGQALSFKI  
TSYTTKQTVIALNVAPSTWGAGMTYKSTVNF5

>PtEXPA25

MASPLKSILATLLLLAIALPDCQAKSKPSLLGKQAIHHAIGRQANHIELPKRHKPKFRPGPWKKAHATFYEGGSGTFGG  
ACNYKDVAEGEGYGMNTVALSSVLFRNGQACGACFEIKCADSPQWCKLGQPSLFVTATDHCPPNPSPNDNGGWCNVPRE  
HFDIAKPVFSQLAGYKAGIPIQYRRLPCKKQGGIRFTILGNPWFYQVIVWNVGGAGDVVSVQVKGDDKLKWTQMERDW  
GATWKTSAILHGESLSFRVRASDERYSTSWHVTPKNWQFGQTYEGKNFK

>PtEXPA26

MASPLKPM LATLLLLAI AF PNCQAKSKPSLSGKQAIHHAIGRLAHDIEIPKRNKPKFQPSPWKEAHATFYEGGSGTFGG  
ACNYKD VAGQGYGMNTAALSSVLFKNGQACGACFEIKCADNPQWCKLGQPSLIVTATDHCPPNPSPNDNGGWCNVPRE  
HFDVAKPVFSQ LAEYEAGIIP IQYRRVPCQKQGGIRFTILGNPW FYQVIVWNVGGAGDVVG VQVKGDDKLKWTQMERDW  
GTTWKTSA ILLGESLSFRVSASDDRDSTS WHVTPKNWQFGQTYEGKNFK

>PtEXPA27

MASFKNSFACLVLMALLGVARSDQISFGEKIDSSWYDAHATFYGDIKGGQTMMGACGYGDLFKQGYGLQTAALSTALFN  
NGQTCGACFELKCVNDPQWCKNHAGTIKITATNLCPN YGASNAWCNPPQQHFDLSMPMFLTIAEYRAGIVPVKYRRIL  
CSKEGGVKFDIHGNPYWMLVLRNVAGAGEVINVRIKGSQTRW IQMSRNWGNWQGTGDLVGQSLSLVTTSDYKRLYF  
NDVAGADWSFGQAYDGKINF

>PtEXPB1

MAIISFQNPFHLP IILAFFLVNSCHCFHPKLFNVSKIQSNSDWS PAGATWYGSPTGAGSDGGACGYGNAVEQAPFSSFI  
SAGGDSIYKSGQCGAC YQVKCTSSSNAACSGNPVTVITDQCPGSPCAQESFHF DLSGTAFGAM AISGKEDQLRNAGV  
LQIQHQRVPCNWP GKTVT FHVDSGSNPYFATVVEYEDGDGELKSVELKQALDSDSWVPMQKSWGAVWKLDAGSLLRAP  
LSIKLTSLESGKTIVASGVIPAGWAPGQTYRSLVNFN

>PtEXPB2

MQLLGLYVVVFLK CFLGVFGQQVHPQHNVADLHWKPATATWYGS PDGDGSDGGACGYGSLVDVKPFRARVGAVSPVLFK  
NGEGCGACYKVRCLDKSICSRRAVTIIVTDECPGGYCSNGNTHFDLSGAAFGRMAISGENGQLRNRGEIPVIYRRT PCK  
YPGKNIAFHVNEGSTDYWLSILVEFEDGDGDVGSMHIREAGGTEWLE MNHVGATWC IIRGPLKGPFSVKLTTLTTGRT  
LSAREVIPRNWAPKATYTSRLNFFH

>PtEXPB3

MQLLGLHVVM LK CFLVVFQQYH THHDVADLHWKPATATWYGS PDGDGSNGGACGYGSLVDVKPLRARVGAVSPILFK  
NGEGCGACYKVRCLDKSICSERAVTIIVTDECPGGYCSNGNTHFDLSGAAFGHMAISGENGQLRNRGEIPVIYRRT PCK  
YPGKNIAFHVNEGSTDYWLSLLVEFEDGDGDVGSMHIREAGGTEWLE MNHLWGANWC VIRGPLKGPLSVKLTTLSTGRT  
LSARDVIPRNWVPKATYTSRLNFFH

>PtEXLA1

MAIFICFLFLAISYATA CDRCVHQSKVAYFSRDSALSSGACGYGSMATGFNSGHLAAAVSSLYKDGSGCGACFQIRCKD  
TTLCSREGTRVIVTD LNRNNQTD FVLSSRAFMAMANKDKGRN I LKQGIVEVEYKRVPC EYKNQNLAVRVEESSKNSNYL  
AIKLLYQGGQTEVVAIDFAKVGSSNWGFMSRNHGAVWDS DRVPSGALQFRFVITAGFDGKWIWARNVLPEDWKPGMTYD  
SGVQITDIAQEGCSPCDDGIWK

>PtEXLA2

MAVFLCFLFLI ISSATGCDRCVHQSKVAYFSKASALSTGACGYGSMAIGFNSGHLAAAVSSLYKDGAGCGACFQIRCKN  
TALCSSRGTTVIVTD LNNNNQTD FVLSSRAFMAMANKGMGQDVLKHGILDVEYKRVPC EYKNQNLAVRVEESSKKNYL  
AIKLLYQGGQTEVVA MDVAKVGSSNWGFMSRNHGAVWDTDRVPAGALQFRFVV TAGFDGKWIWAQKVLPE DWKPGMTYD  
SGVQITDIAQEGCSPCGDGIWK

>PtEXLB1

MGF AFKYGYSLLC IMALLPAISYSQDYTF SRATYYGSPDCLGTPSGACGFGEYGR TVNDANVAGVSRLYKNGTGCGGCY  
QVRCKAPNLCTDDGVNVVVT DYGEGDKTDFILSPRAYARMAHPNMAVELIAYGVVDVEFRRI PCRYSGYNLMFKVHEHS  
RFPDYLA ILLYQAGQNEILAVELWQEDCKEWRGMRRAYGAVWDMPNPPKG AISLRFQVSGSAGVTYWAQAANVIPSDW  
KAGIAYDSTVQLS

>PtEXLB2

MGFALKYGY SILCVAVALLPAISHSQDYTC SRATYFGSPDCLGTPTGACGFGGYGR TVNDANVAGVSRLFKNGTGCGG  
CYQVRCKASNLCSDDGVNVVVT DYGEGDKTDFILSTRAYARMARPNMALELFAYGVVDVEFRRI PCRYNGYNLMFKVHE  
HSRFP EYLAIVLLYQAGQNEILAVELRQEDCKEWRGMRRAYGAVWDIPNPPKG AISLKLQVCGSAGVTWVQADNVLP SD  
WKAGVAYDSAIQLP

>PtEXLB3

MVPTLQFLFL FLSGTL LFMQTLAEAA TCSDCFIHSRAAYYPNSYENGTD TGRCGYGSFGATLNGGDVSAVSDLYRDGVGC  
GACYQVRCTDSHYCTDKGVTIVTDHGSSHNTDFILSRRAFGRMAQT TDAASLIALGVVDVEYKRVSCSYPNKNITIK  
IDENS DHPSYMGFVVWYQQGRRDITAVHLCETQNFACKVLDRSYGAVWTTTSPPSGPLSLRMLFSEEDGDETWVVPVNN  
IPNDWKAGQTYDTGVQVNS

>PtEXLB4

MAPSLRFLFL SATLFFMQTLTEAA TCSDCFIHSRAAYYPNSDENGTDTGRCGYGSFGATLNGGDVAAASDLYRDGVGC  
GACYQVKCTNSYYCTDNGVTIVITDQGSSDNTDFILSRRAFGRMAQT TDAASLLALGVVDIEYRRVSCSYPNKNITIK  
IDENS NPYYLGFVIWYQQGRSDITAVQLCETQNFVCKLLDRSYGSVWTTTSPPSGPLSLRMLFSDENGDETWVVPVNN  
IPNDWKAGETYDTGVQVNL
